# Supplementary material for: A hybrid deconvolution approach for estimation of in vivo non-displaceable binding for brain PET targets without a reference region
Source: PubMed Central journal article supplement (PMC5411064; doi:10.1371/journal.pone.0176636), 2017-05-01
Supplement: pone.0176636.s001.pdf [file pone.0176636.s001.pdf]

**[<sup>11</sup>C]DASB**

**[<sup>11</sup>C]CUMI-101**

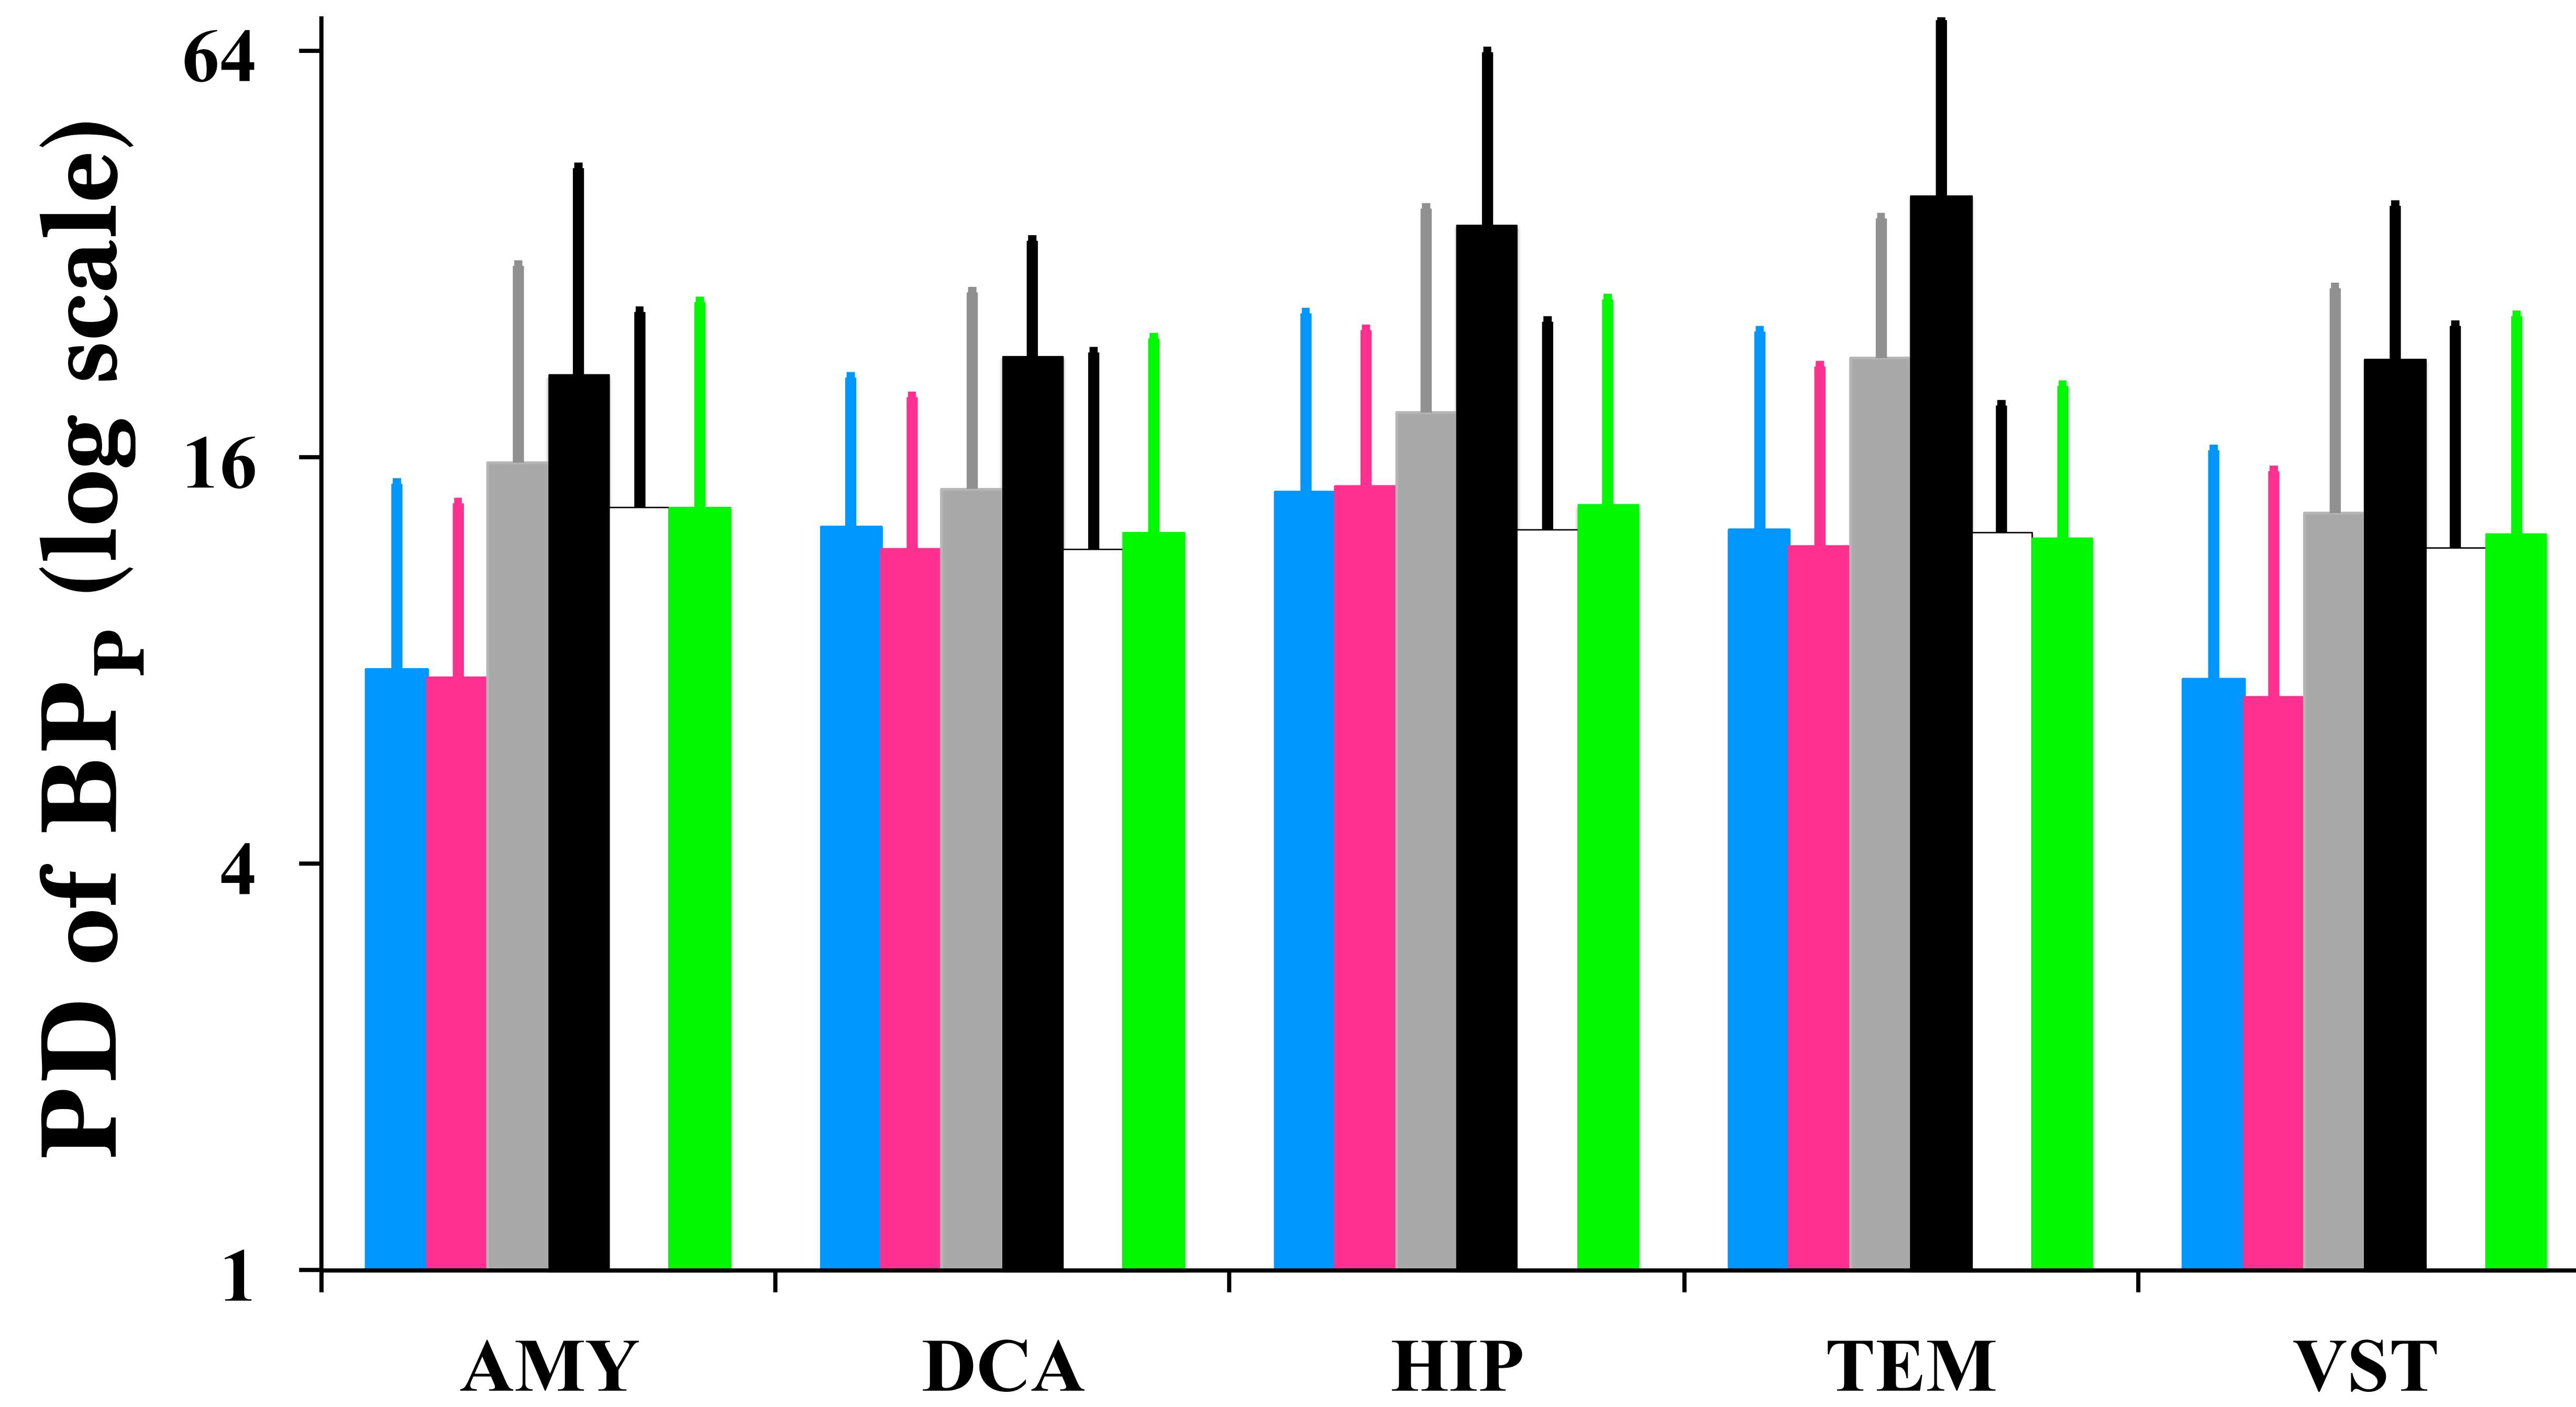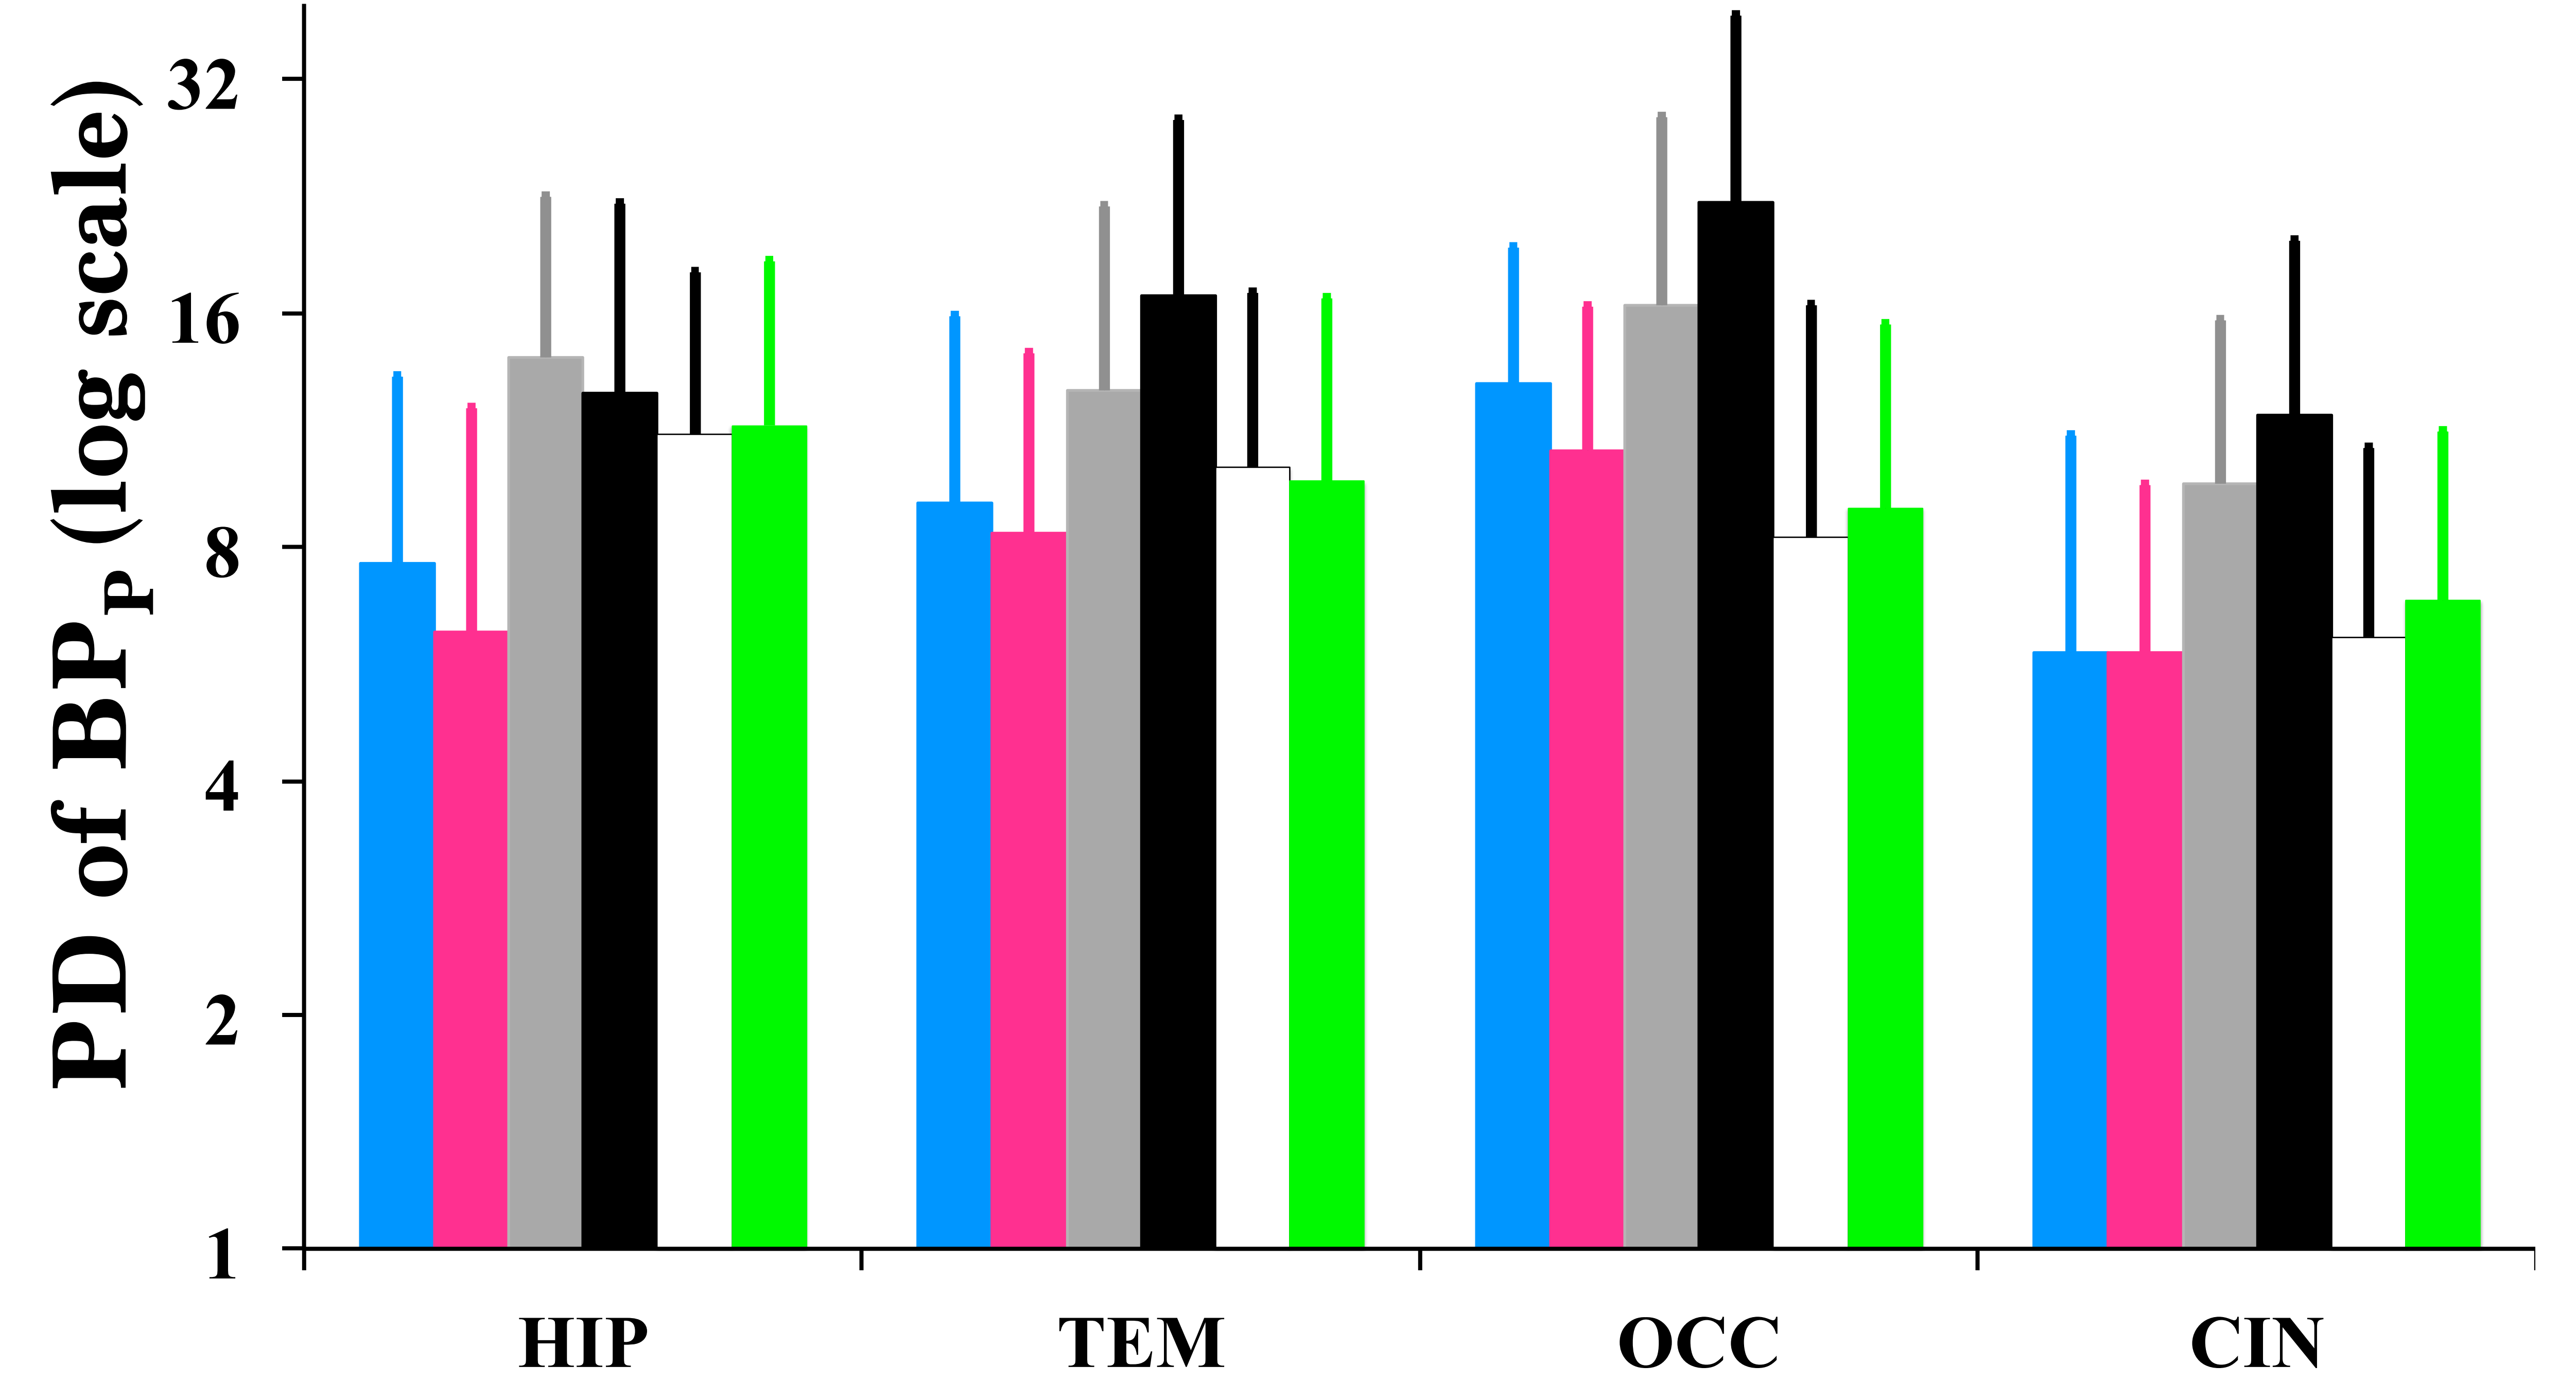

■  $BP_{P-END}(\beta_{opt-S}, \gamma_{opt-S}) = V_{T-END} - V_{ND} \text{ (HYDECA; } \beta_{opt-S}, \gamma_{opt-S})$ 
■  $BP_{P-RR,LEGA} = V_T \text{ (LEGA)} - V_{T-RR,LEGA}$ 
□  $BP_{P-\alpha} = V_T \text{ (LEGA)} - \alpha V_{T-RR,LEGA}$   
■  $BP_{P-END}(\beta_{opt-B}, \gamma_{opt-B}) = V_{T-END} - V_{ND} \text{ (HYDECA; } \beta_{opt-B}, \gamma_{opt-B})$ 
■  $BP_{P-RR,2TCM} = V_T \text{ (2TCM)} - V_{T-RR,2TCM}$ 
■  $BP_{P-d} = V_T \text{ (LEGA)} - (V_{T-RR,LEGA} - d)$

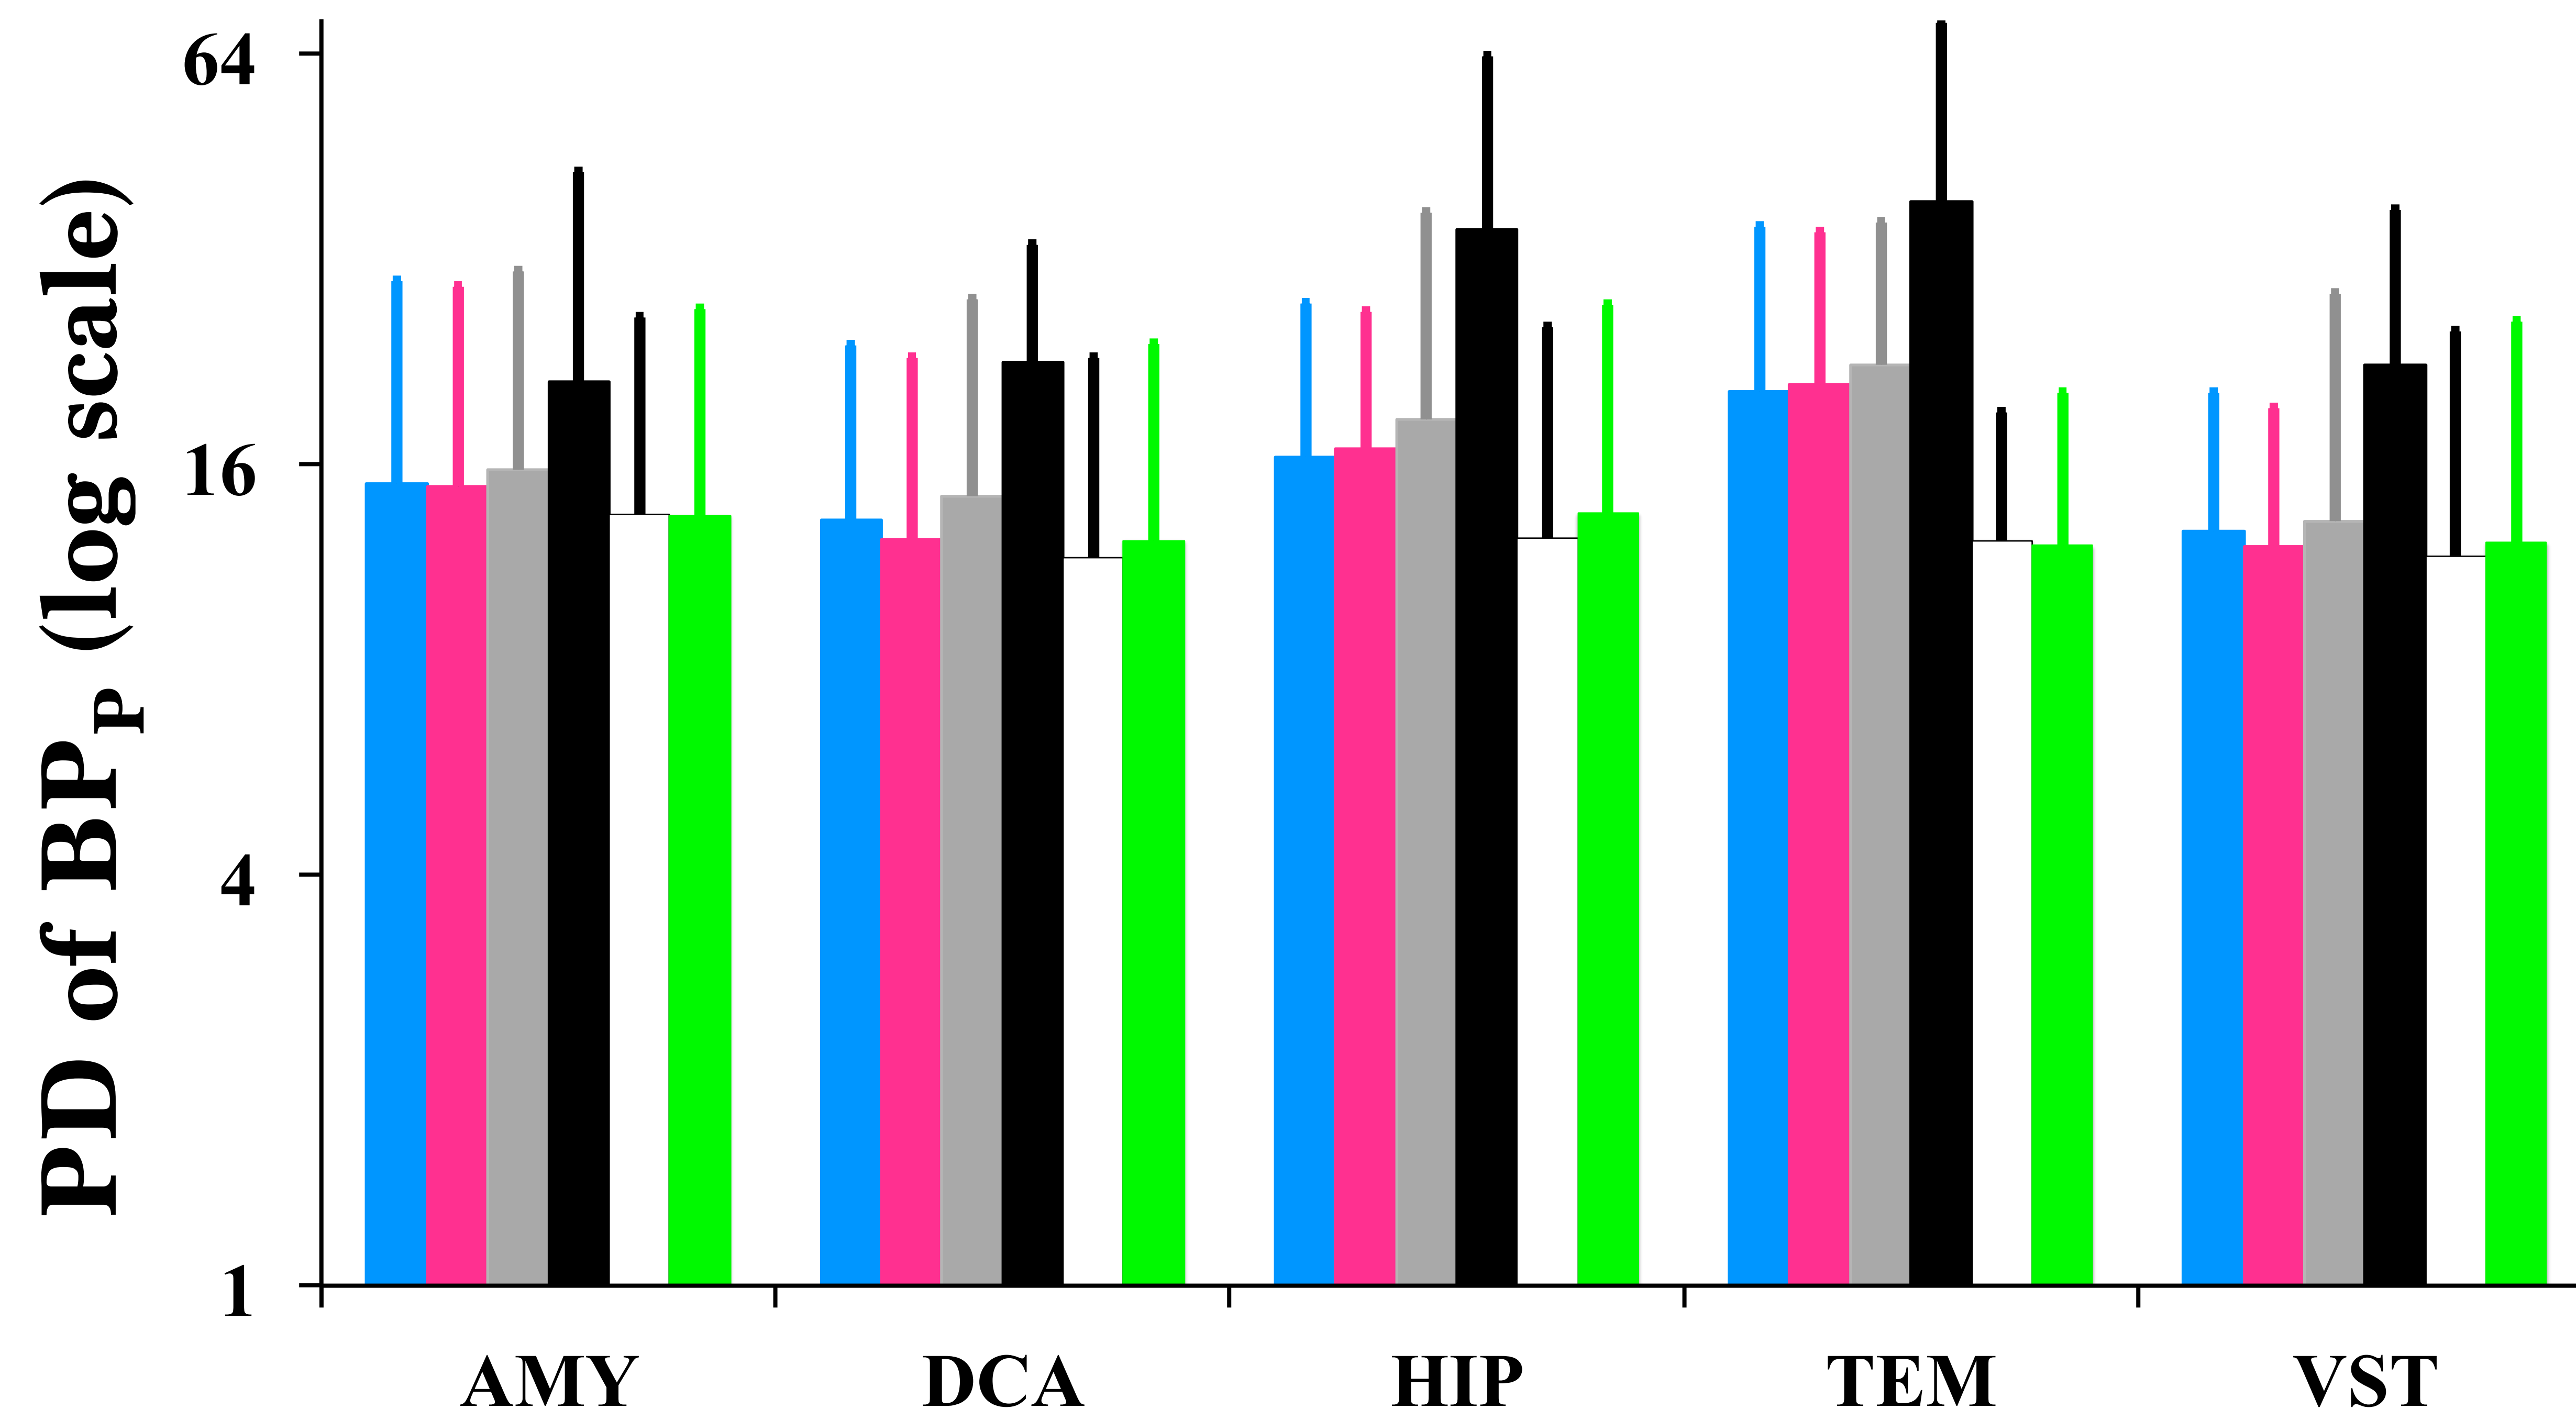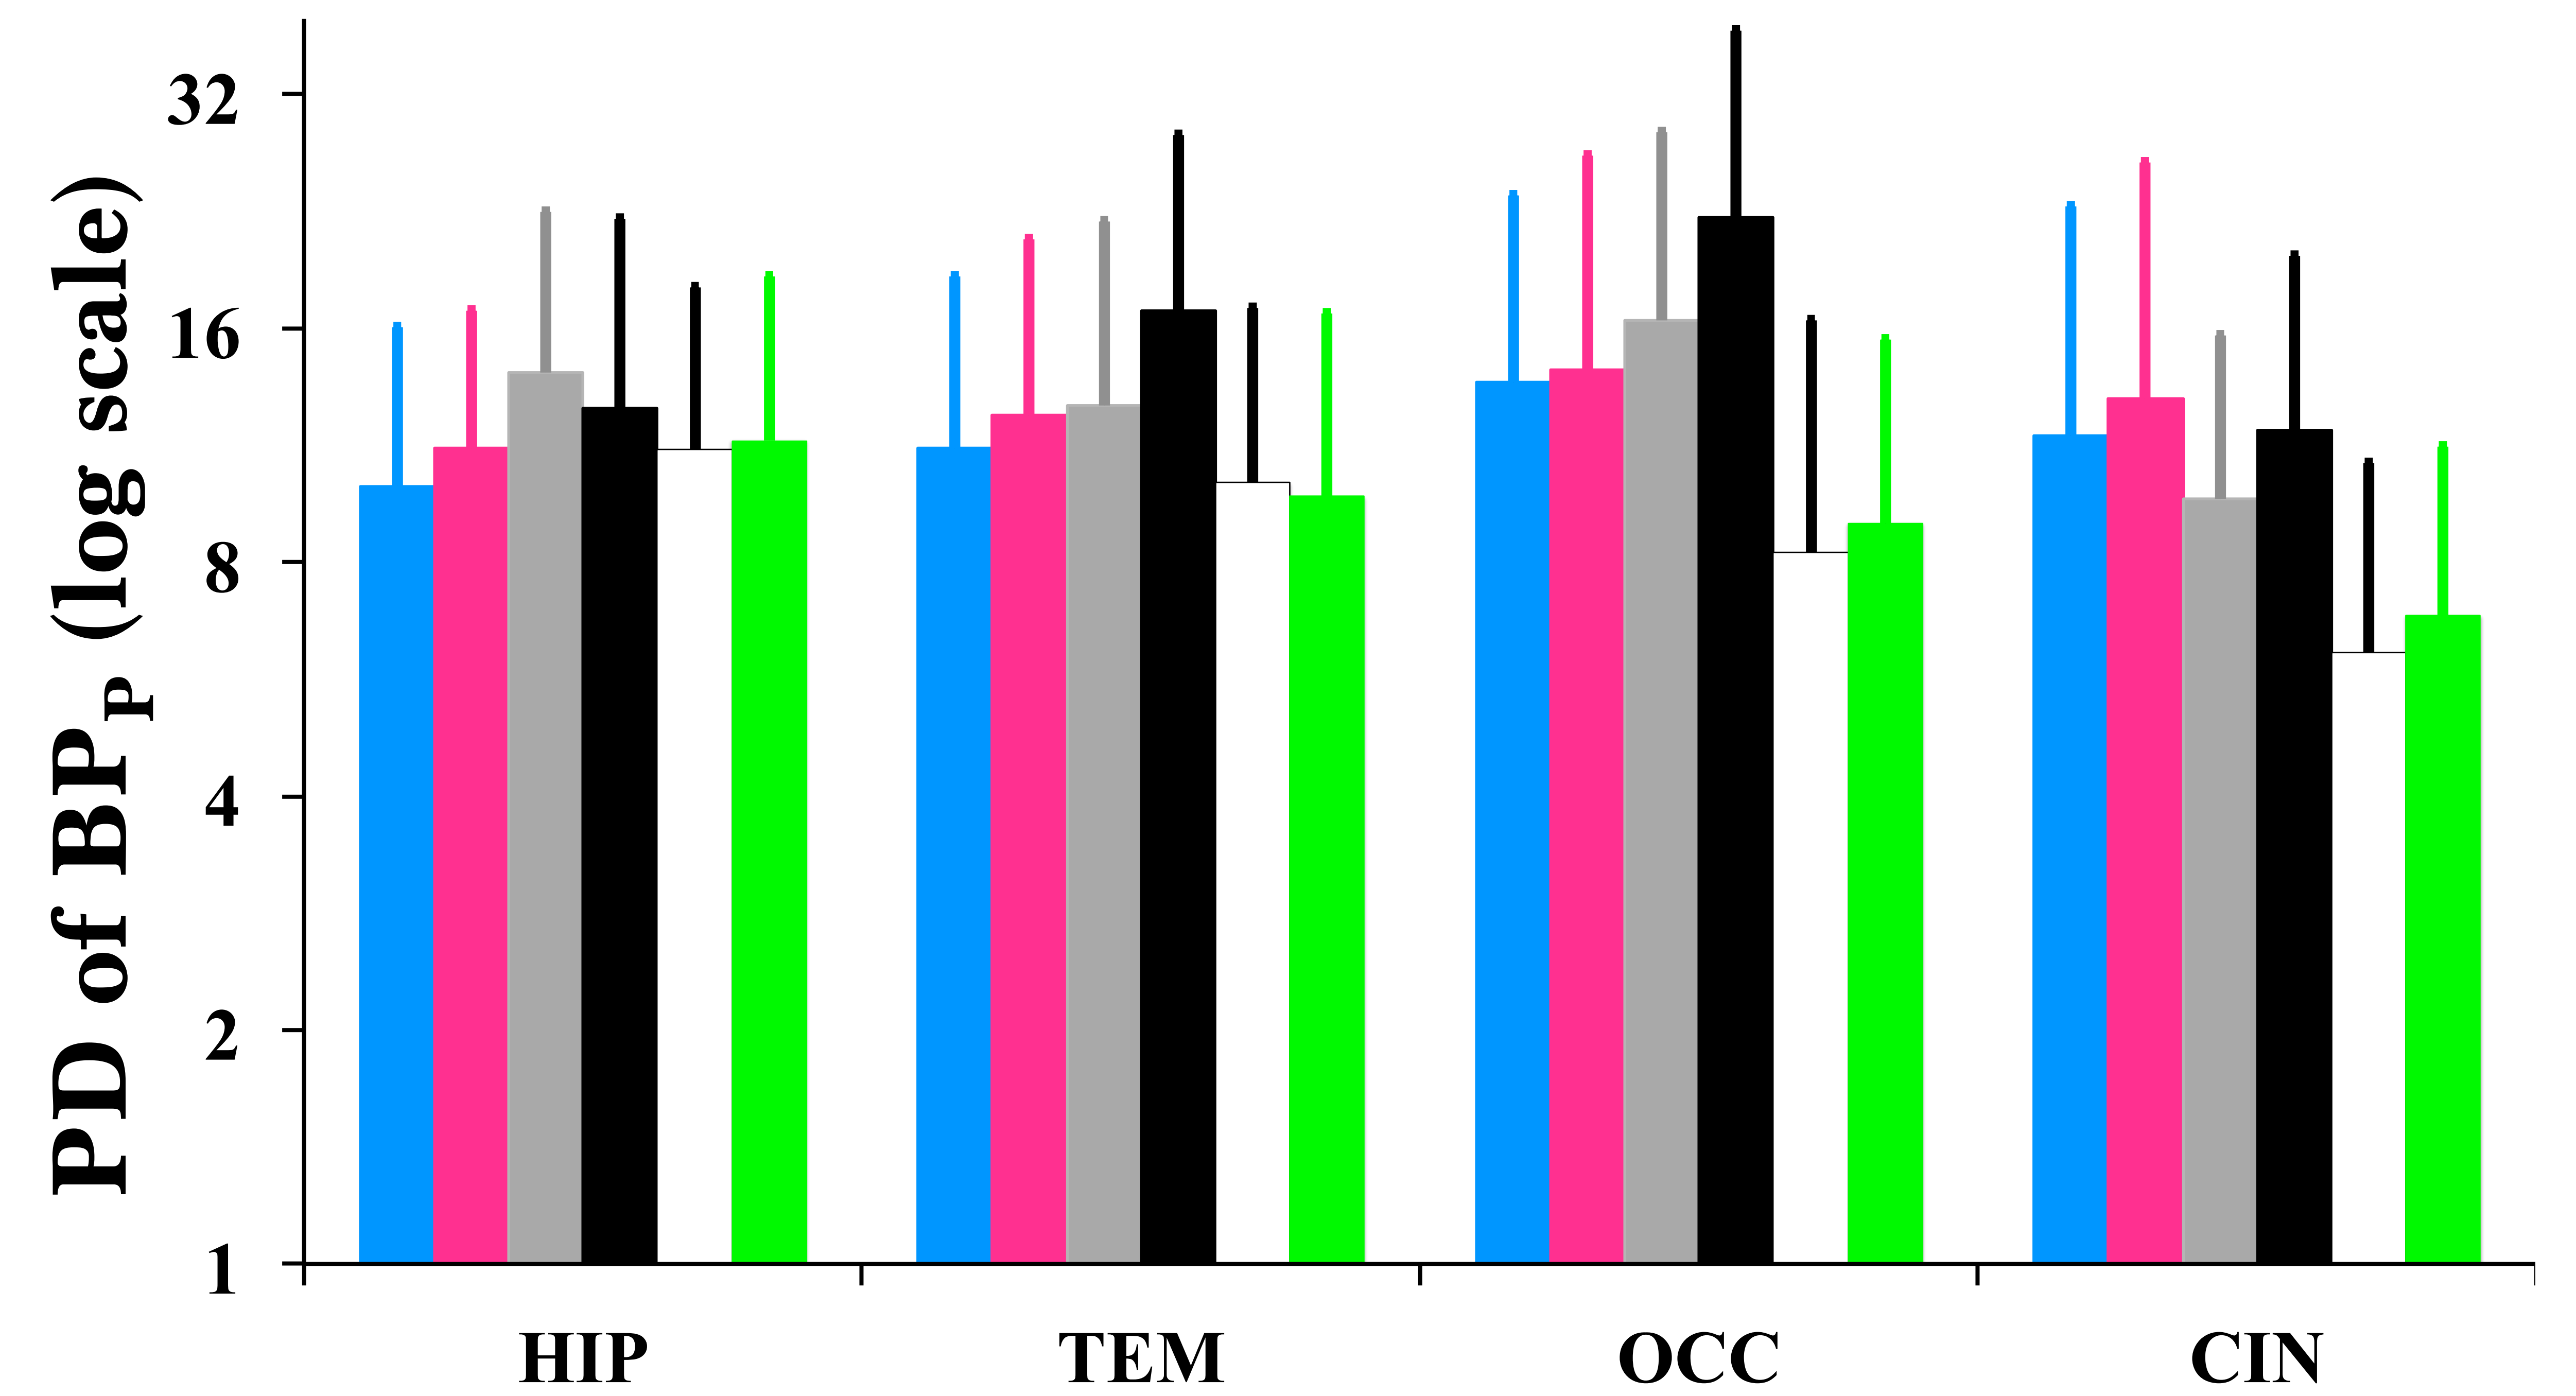

■  $BP_{P-NP2}(\beta_{opt-S}, \gamma_{opt-S}) = V_{T-NP2} - V_{ND} \text{ (HYDECA; } \beta_{opt-S}, \gamma_{opt-S})$ 
■  $BP_{P-NP2}(\beta_{opt-B}, \gamma_{opt-B}) = V_{T-NP2} - V_{ND} \text{ (HYDECA; } \beta_{opt-B}, \gamma_{opt-B})$
