# Supplementary material for: A hybrid deconvolution approach for estimation of in vivo non-displaceable binding for brain PET targets without a reference region
Source: PubMed Central journal article supplement (PMC5411064; doi:10.1371/journal.pone.0176636), 2017-05-01
Supplement: pone.0176636.s002.pdf [file pone.0176636.s002.pdf]

**[<sup>11</sup>C]DASB**

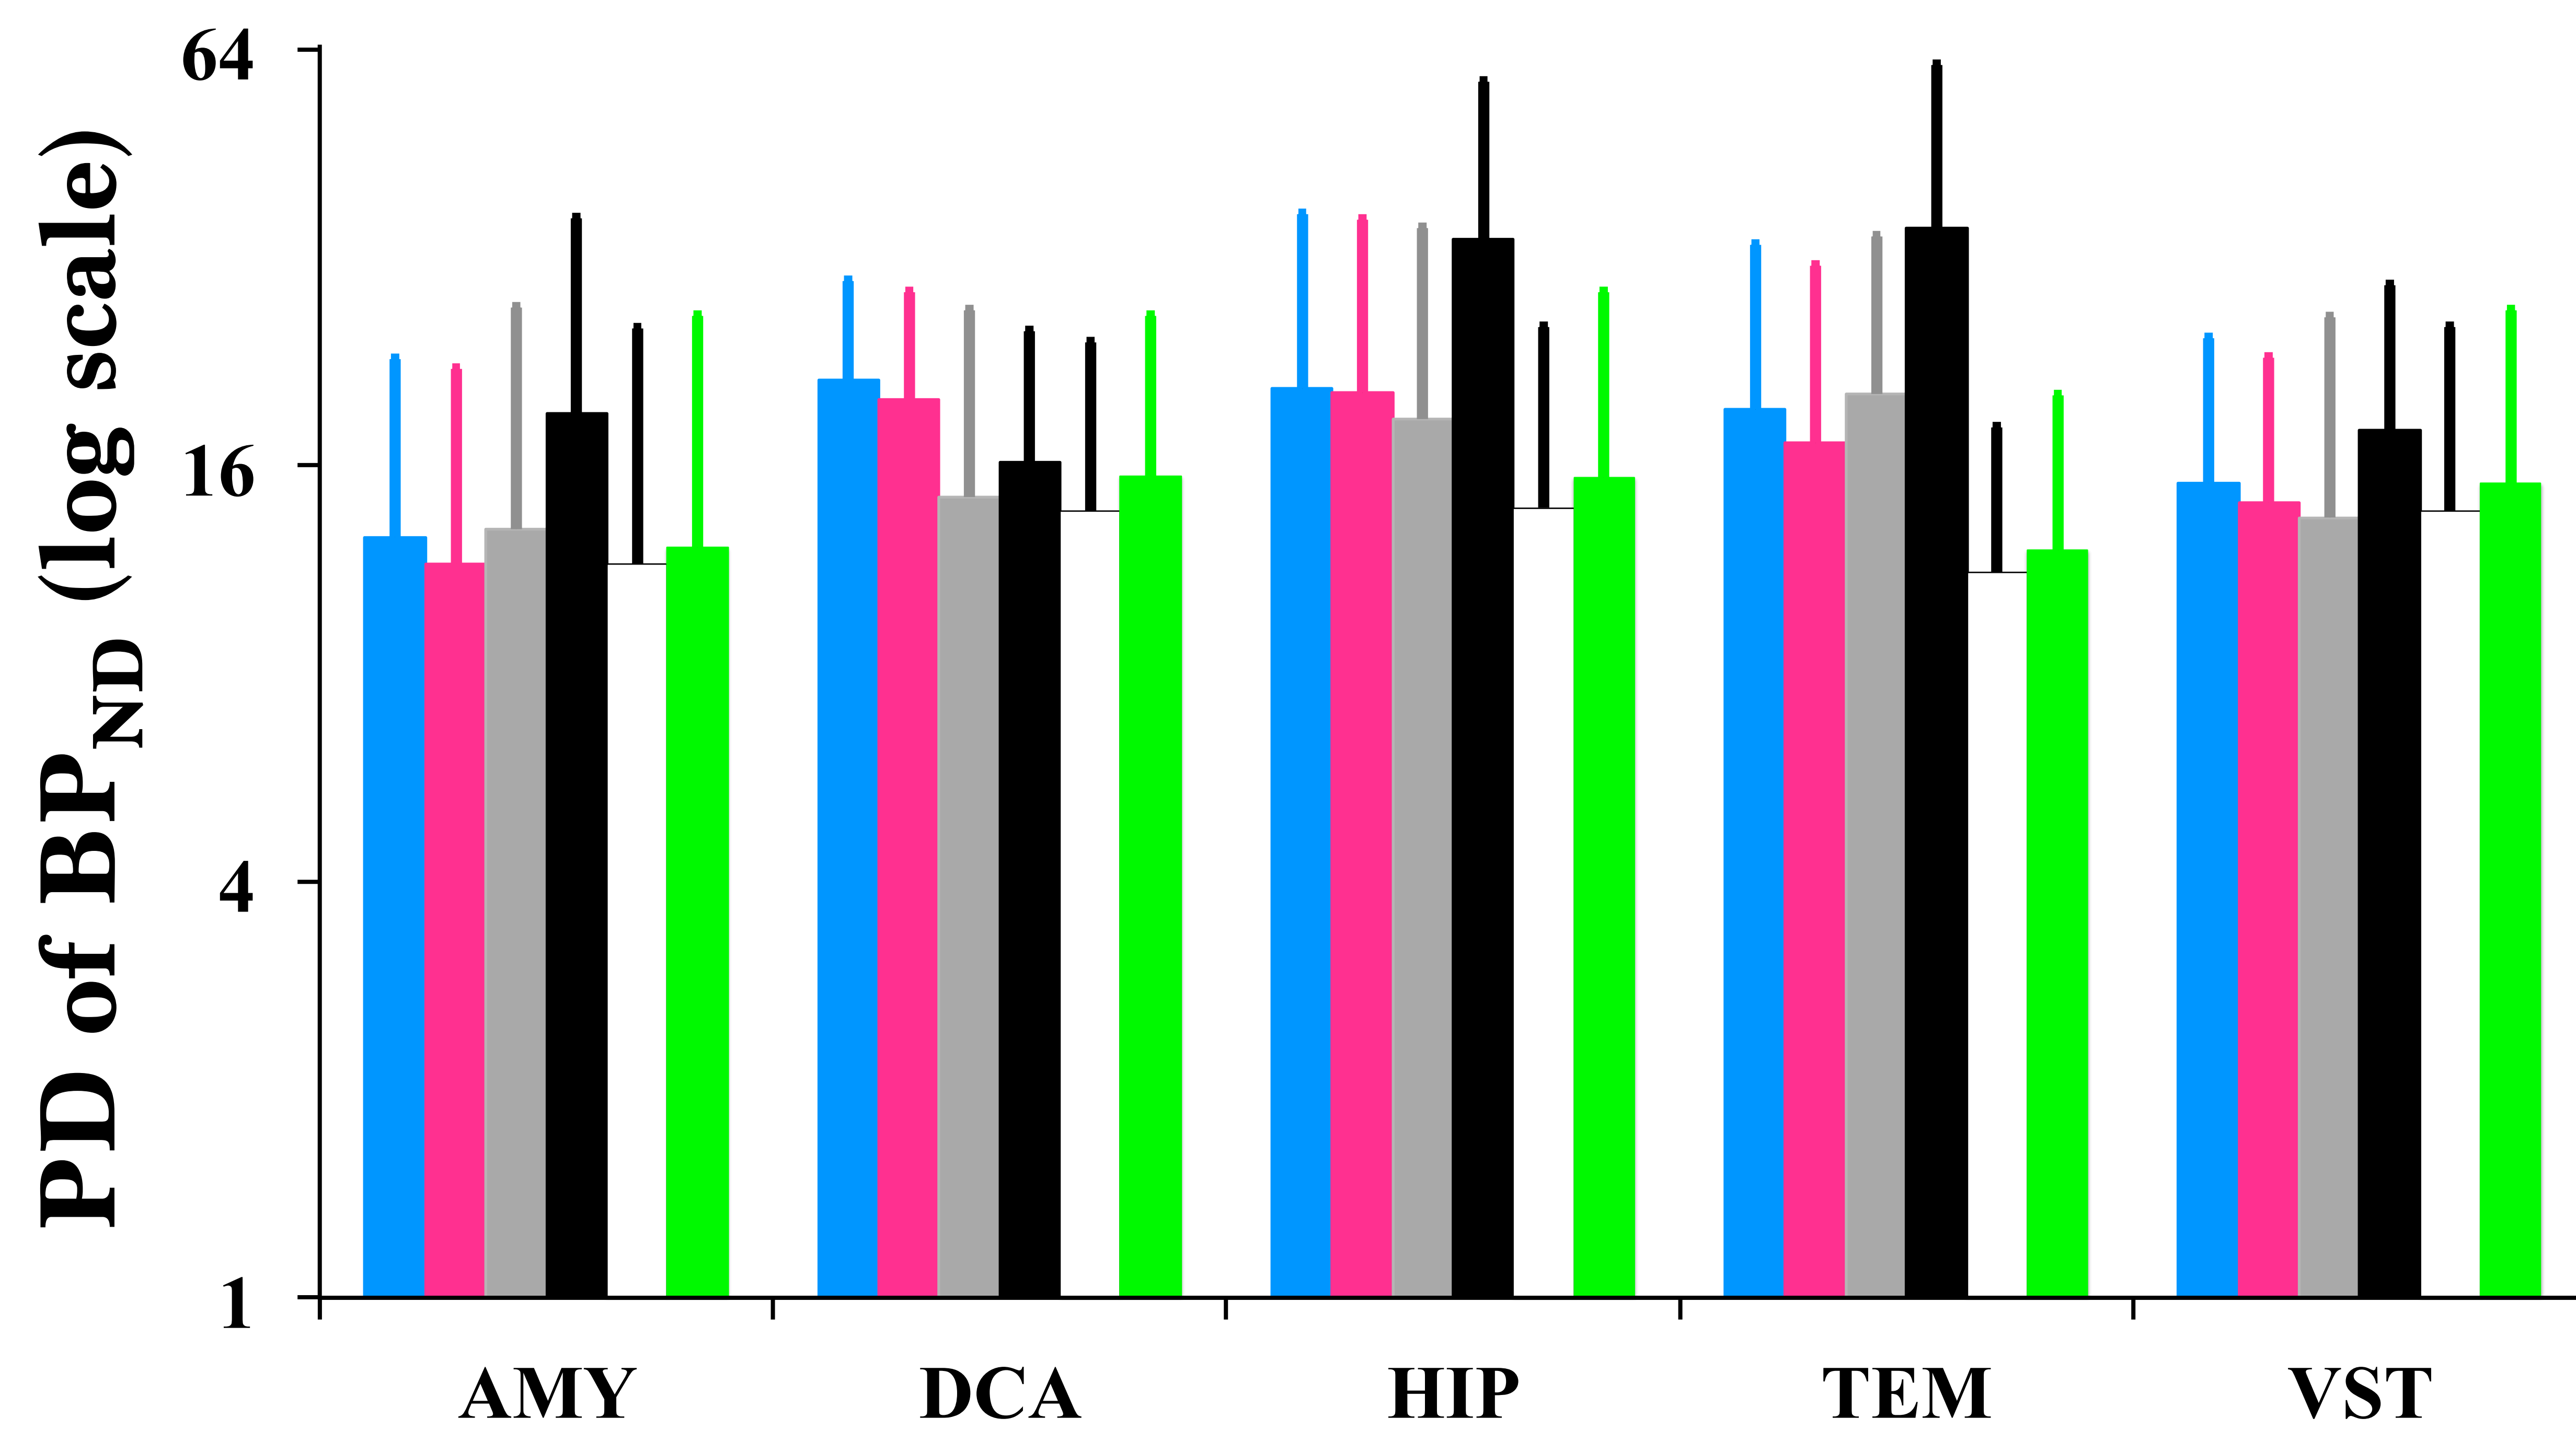

**[<sup>11</sup>C]CUMI-101**

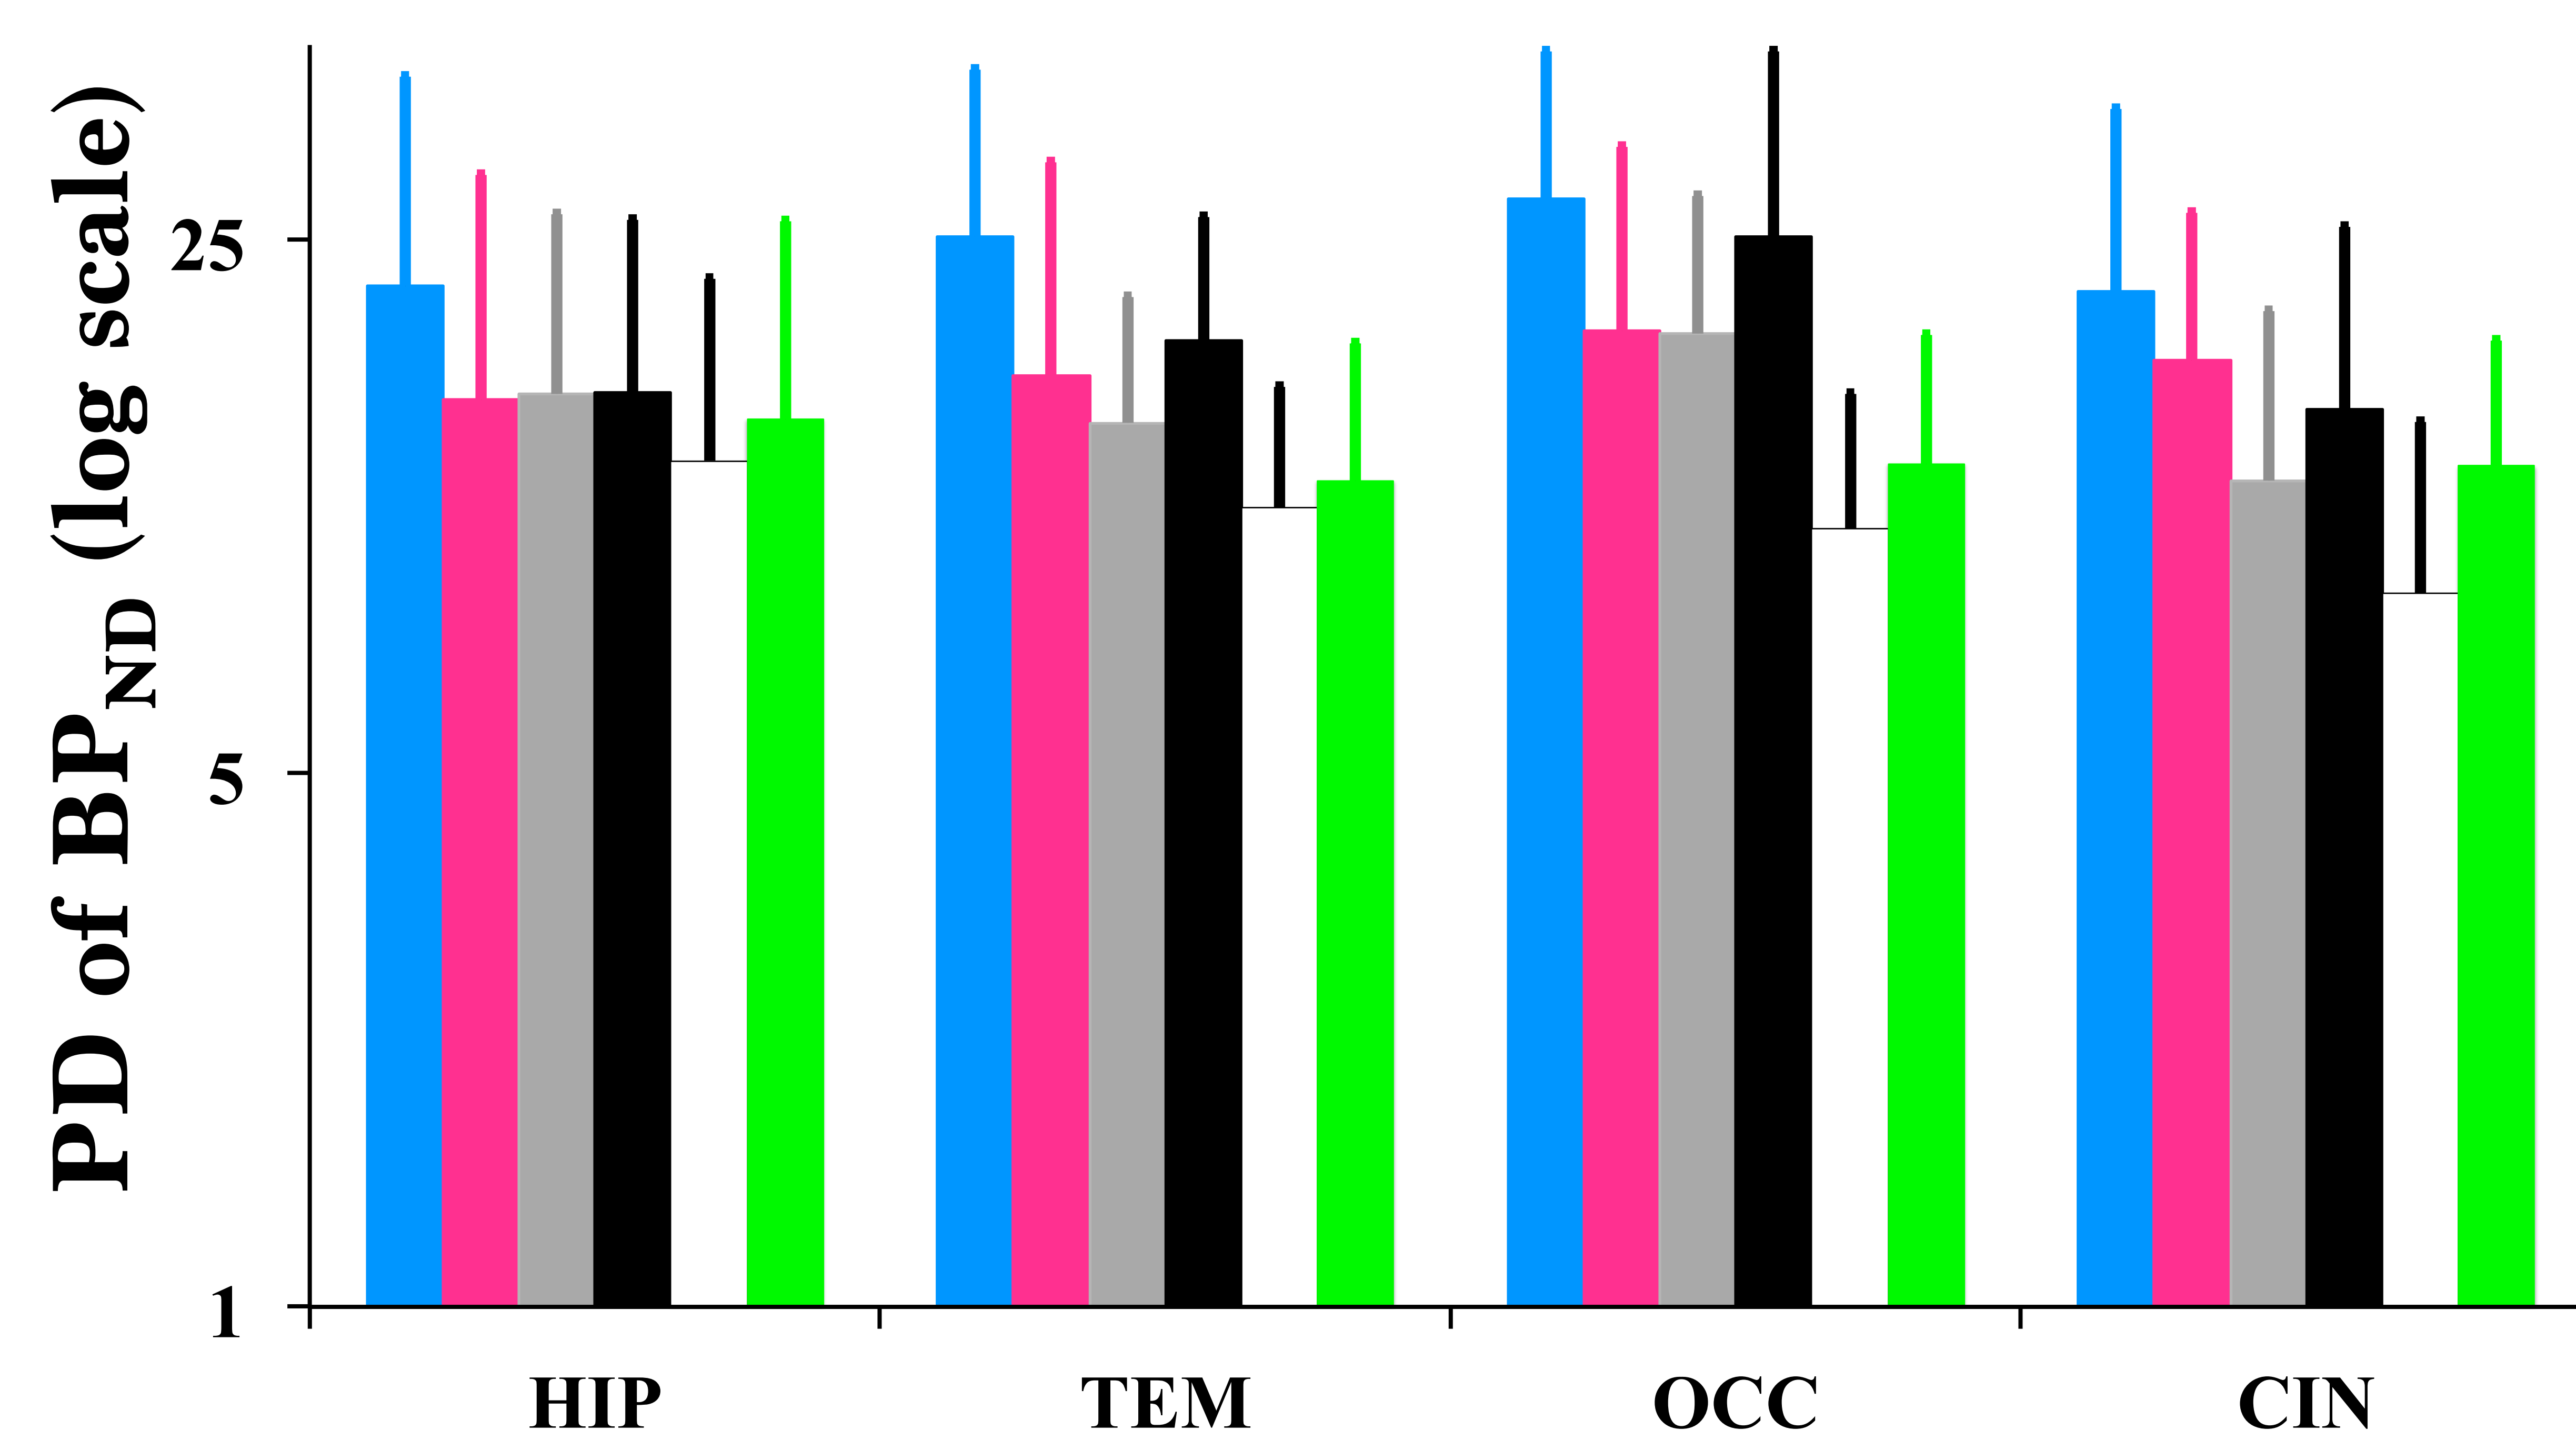

**■**  $BP_{ND-END}(\beta_{opt-S}, \gamma_{opt-S}) = BP_{P-END}(\beta_{opt-S}, \gamma_{opt-S})/V_{ND}$  (HYDECA;  $\beta_{opt-S}, \gamma_{opt-S}$ )

**■**  $BP_{ND-RR,LEGA} = BP_{P-RR,LEGA}/V_{T-RR,LEGA}$

**■**  $BP_{ND-END}(\beta_{opt-B}, \gamma_{opt-B}) = BP_{P-END}(\beta_{opt-B}, \gamma_{opt-B})/V_{ND}$  (HYDECA;  $\beta_{opt-B}, \gamma_{opt-B}$ )

**■**  $BP_{ND-RR,2TCM} = BP_{P-RR,2TCM}/V_{T-RR,2TCM}$

**□**  $BP_{ND-\alpha} = BP_{P-\alpha}/\alpha V_{T-RR,LEGA}$

**■**  $BP_{ND-d} = BP_{P-d}/(V_{T-RR,LEGA} - d)$

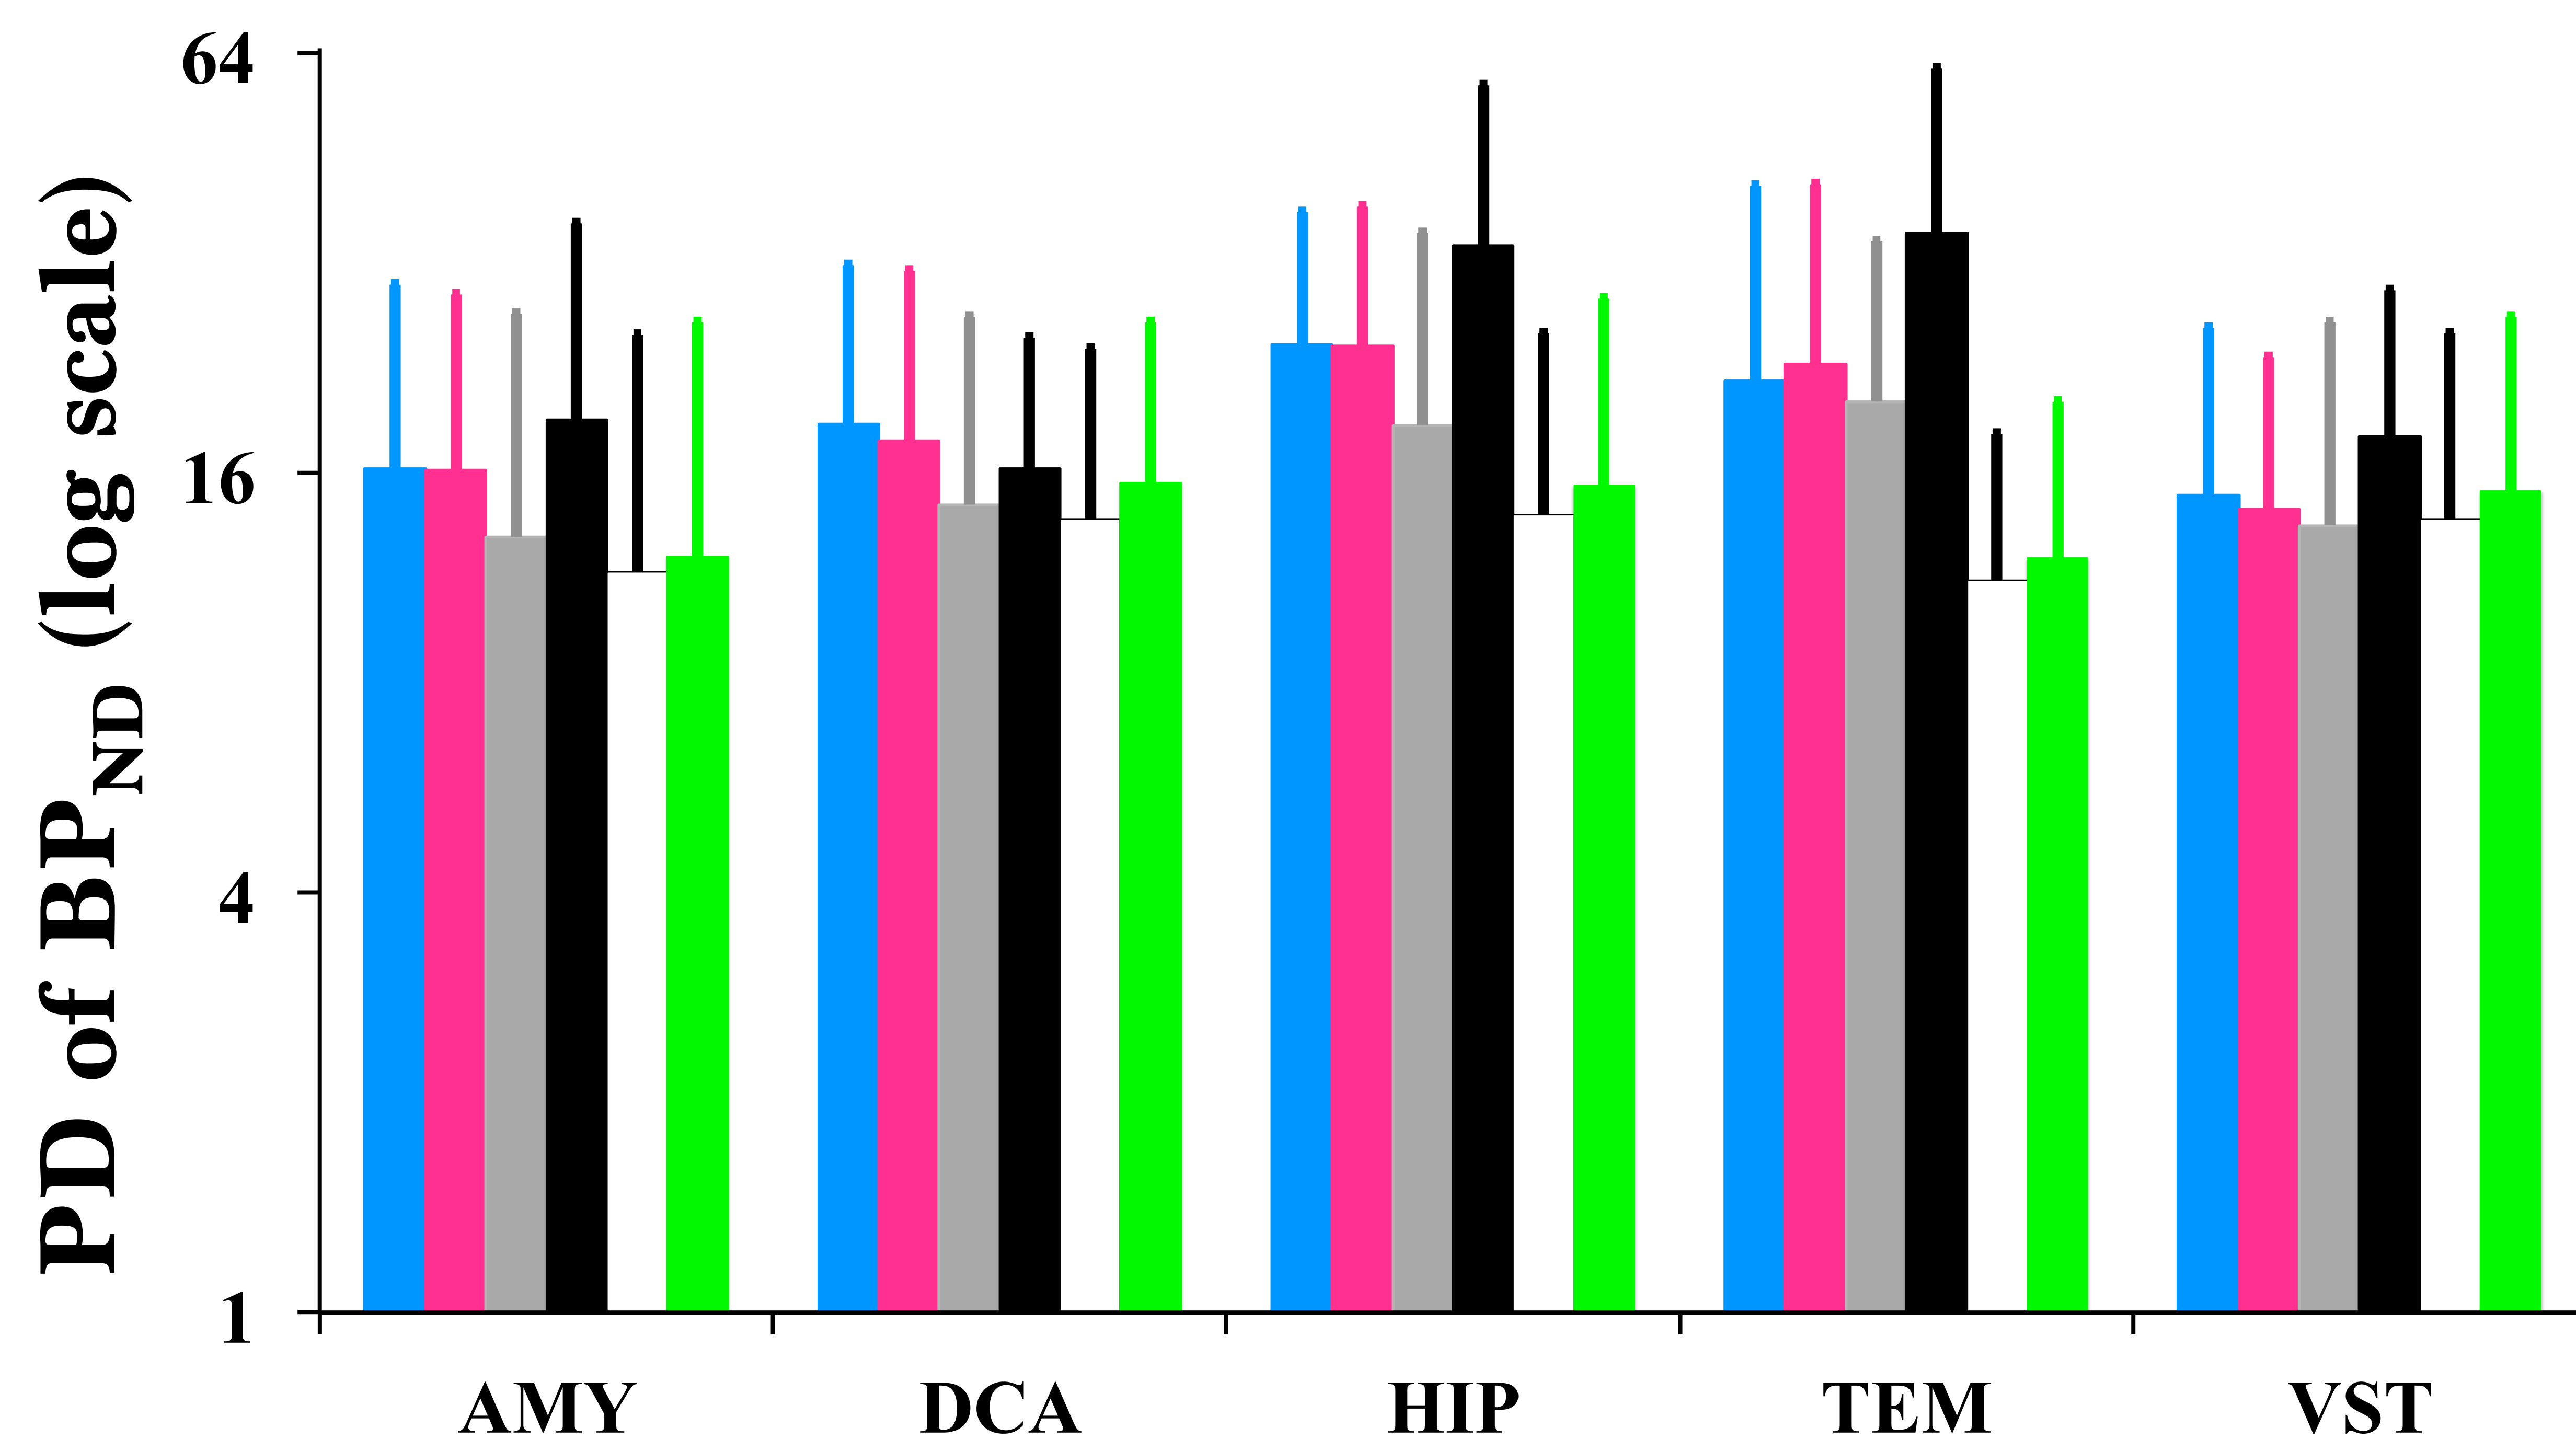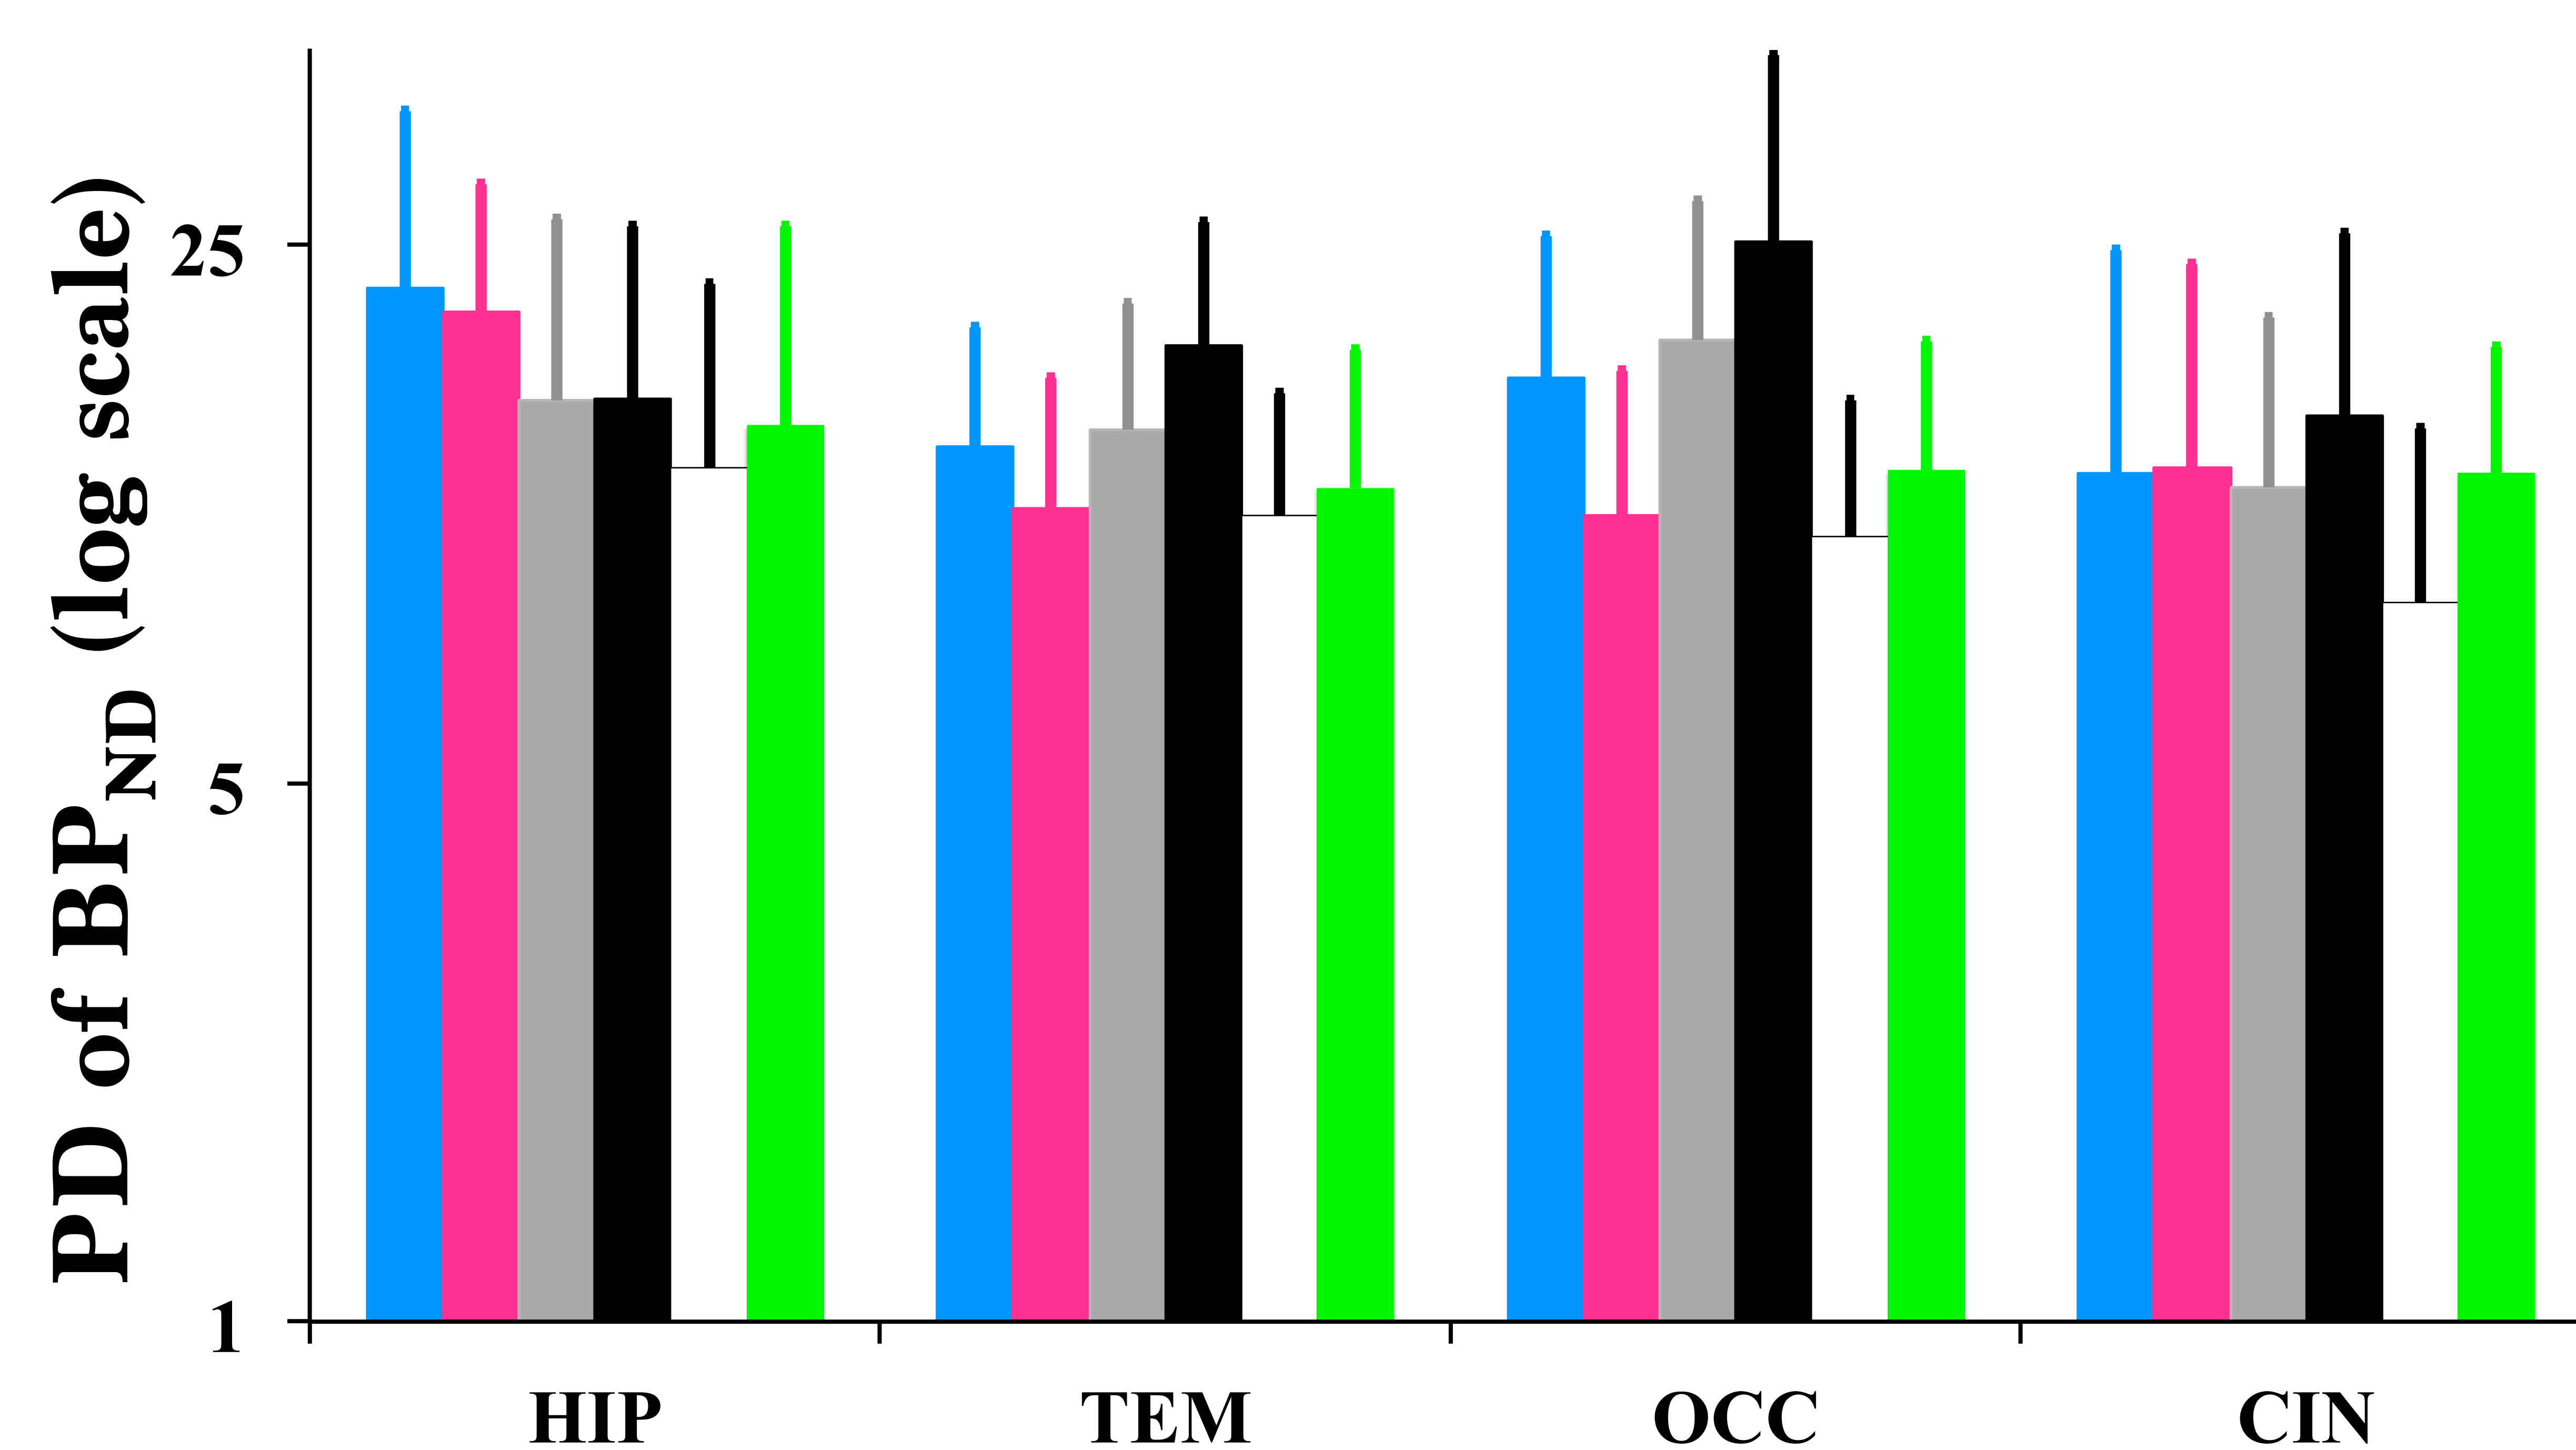

**■**  $BP_{ND-NP2}(\beta_{opt-S}, \gamma_{opt-S}) = BP_{P-NP2}(\beta_{opt-S}, \gamma_{opt-S})/V_{ND}$  (HYDECA;  $\beta_{opt-S}, \gamma_{opt-S}$ )

**■**  $BP_{ND-NP2}(\beta_{opt-B}, \gamma_{opt-B}) = BP_{P-NP2}(\beta_{opt-B}, \gamma_{opt-B})/V_{ND}$  (HYDECA;  $\beta_{opt-B}, \gamma_{opt-B}$ )
