# Supplementary material for: A hybrid deconvolution approach for estimation of in vivo non-displaceable binding for brain PET targets without a reference region
Source: PubMed Central journal article supplement (PMC5411064; doi:10.1371/journal.pone.0176636), 2017-05-01

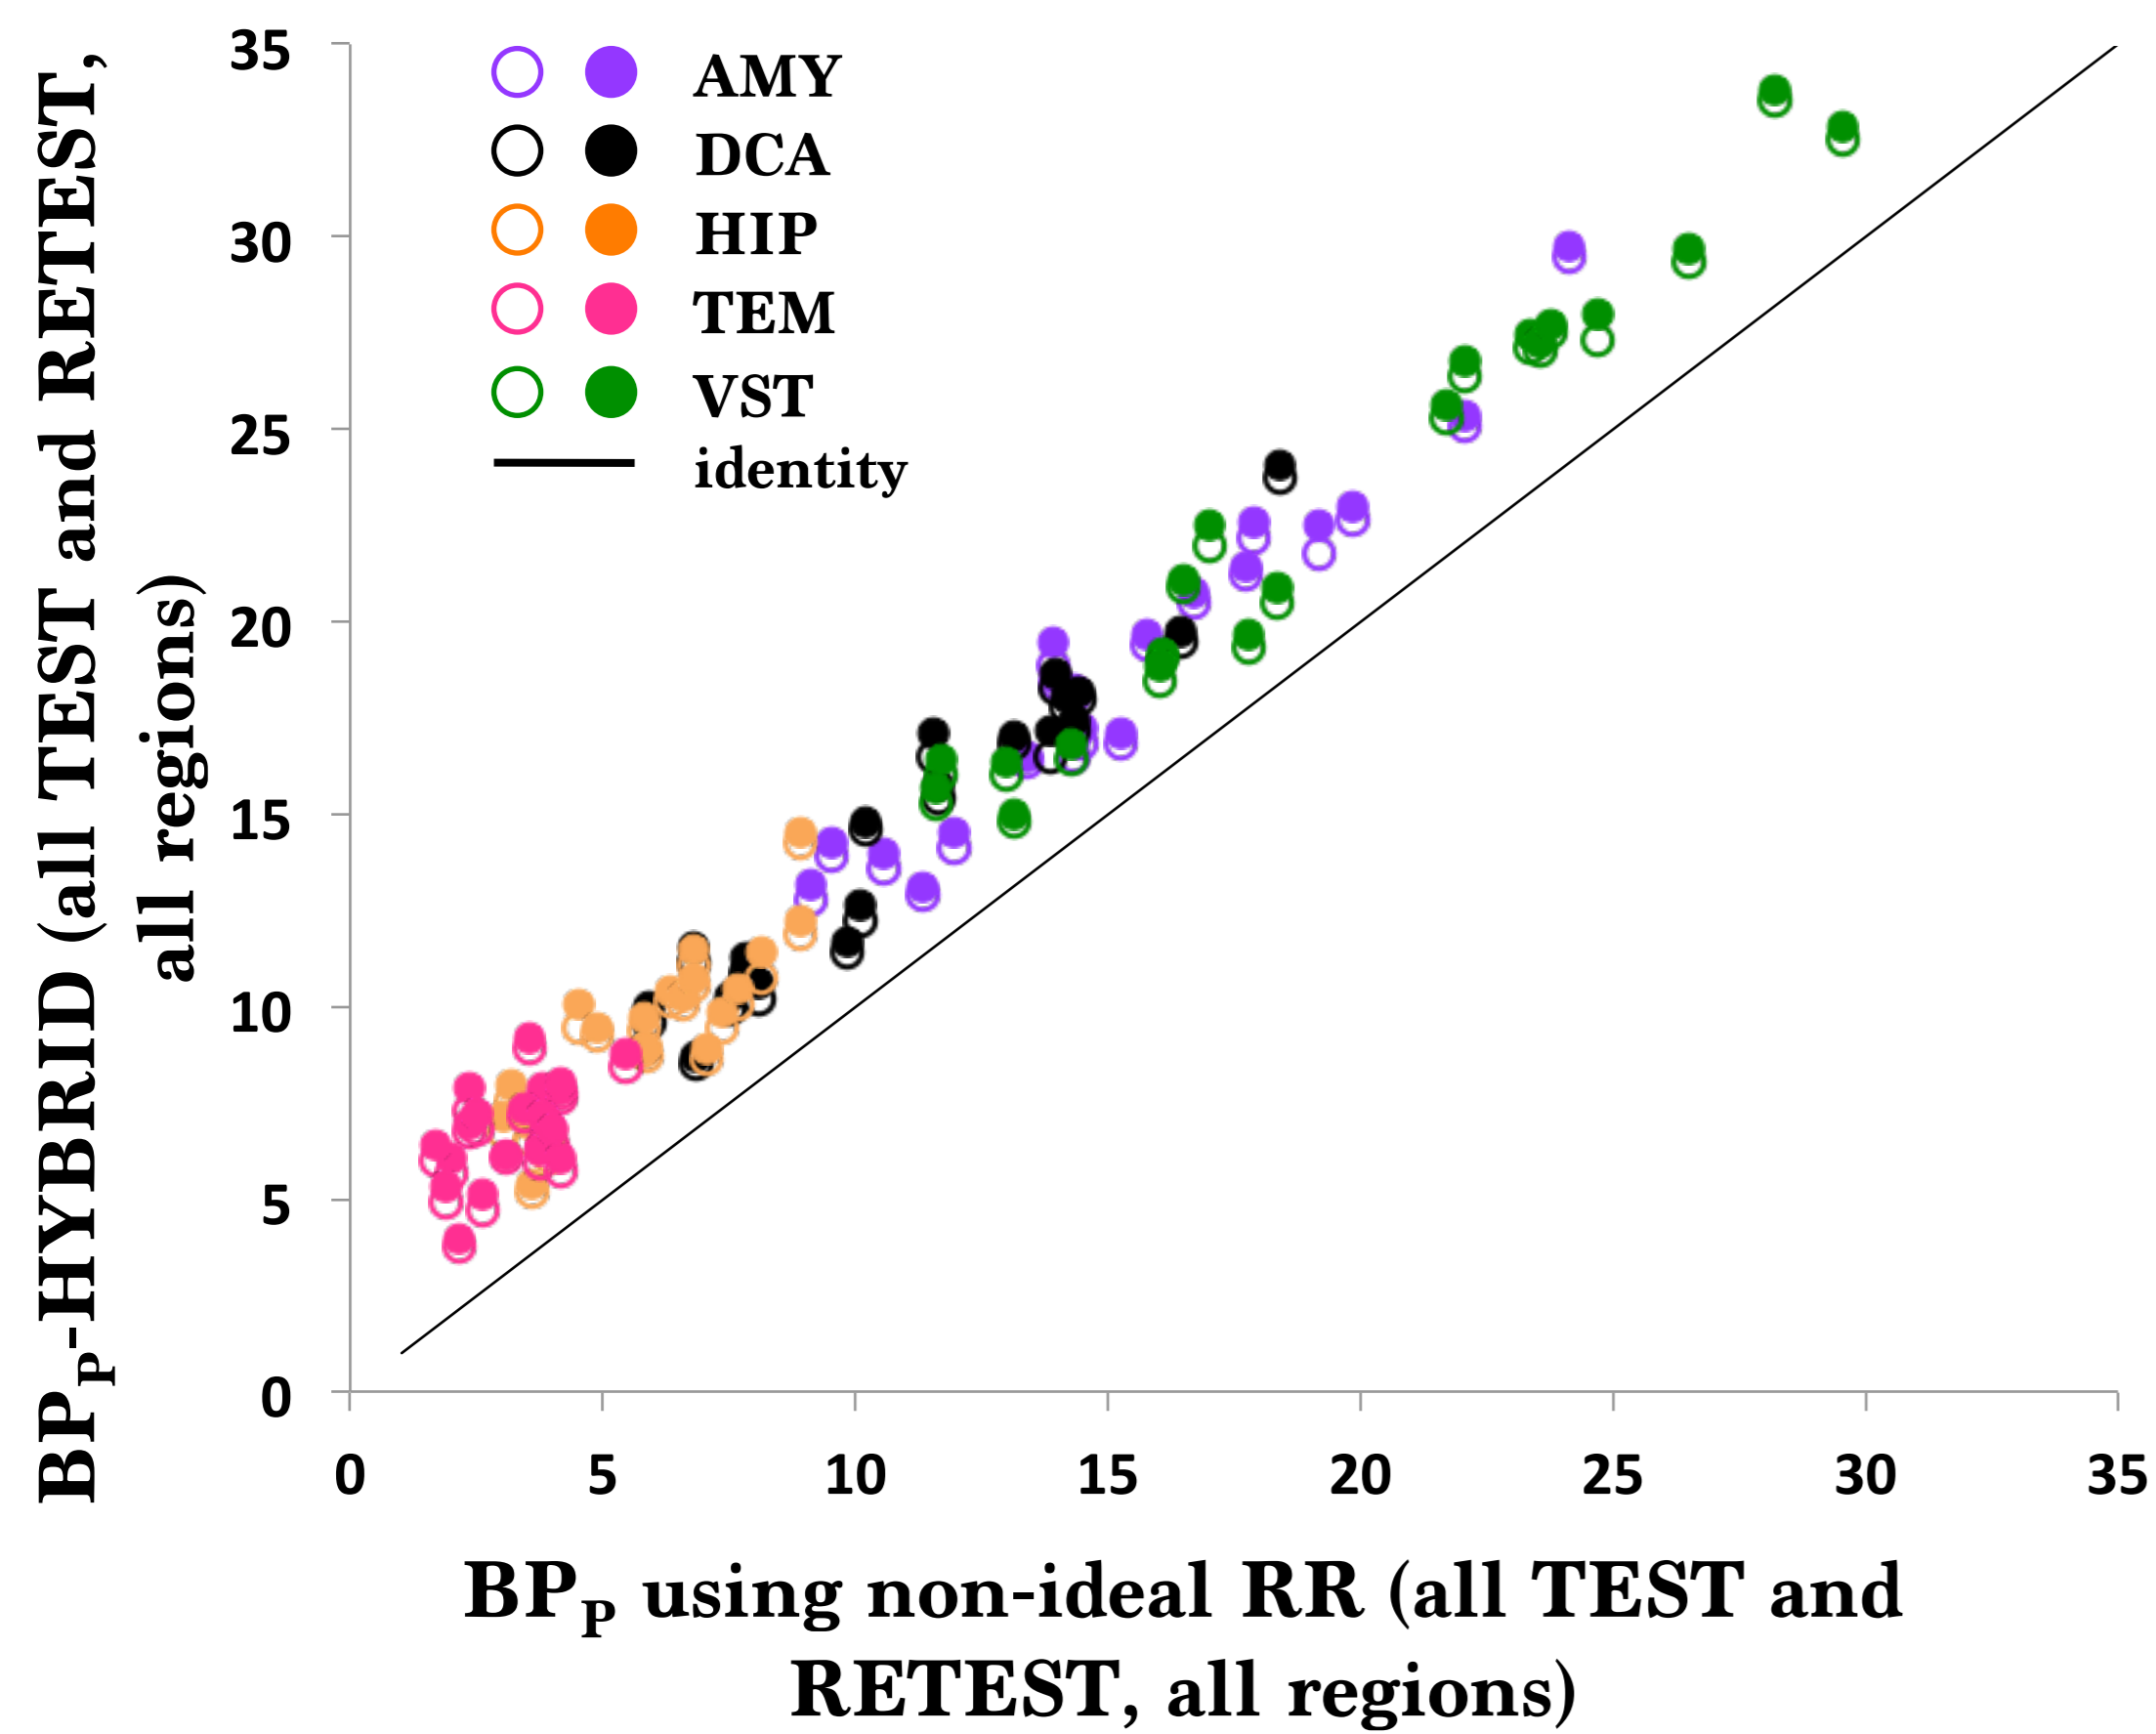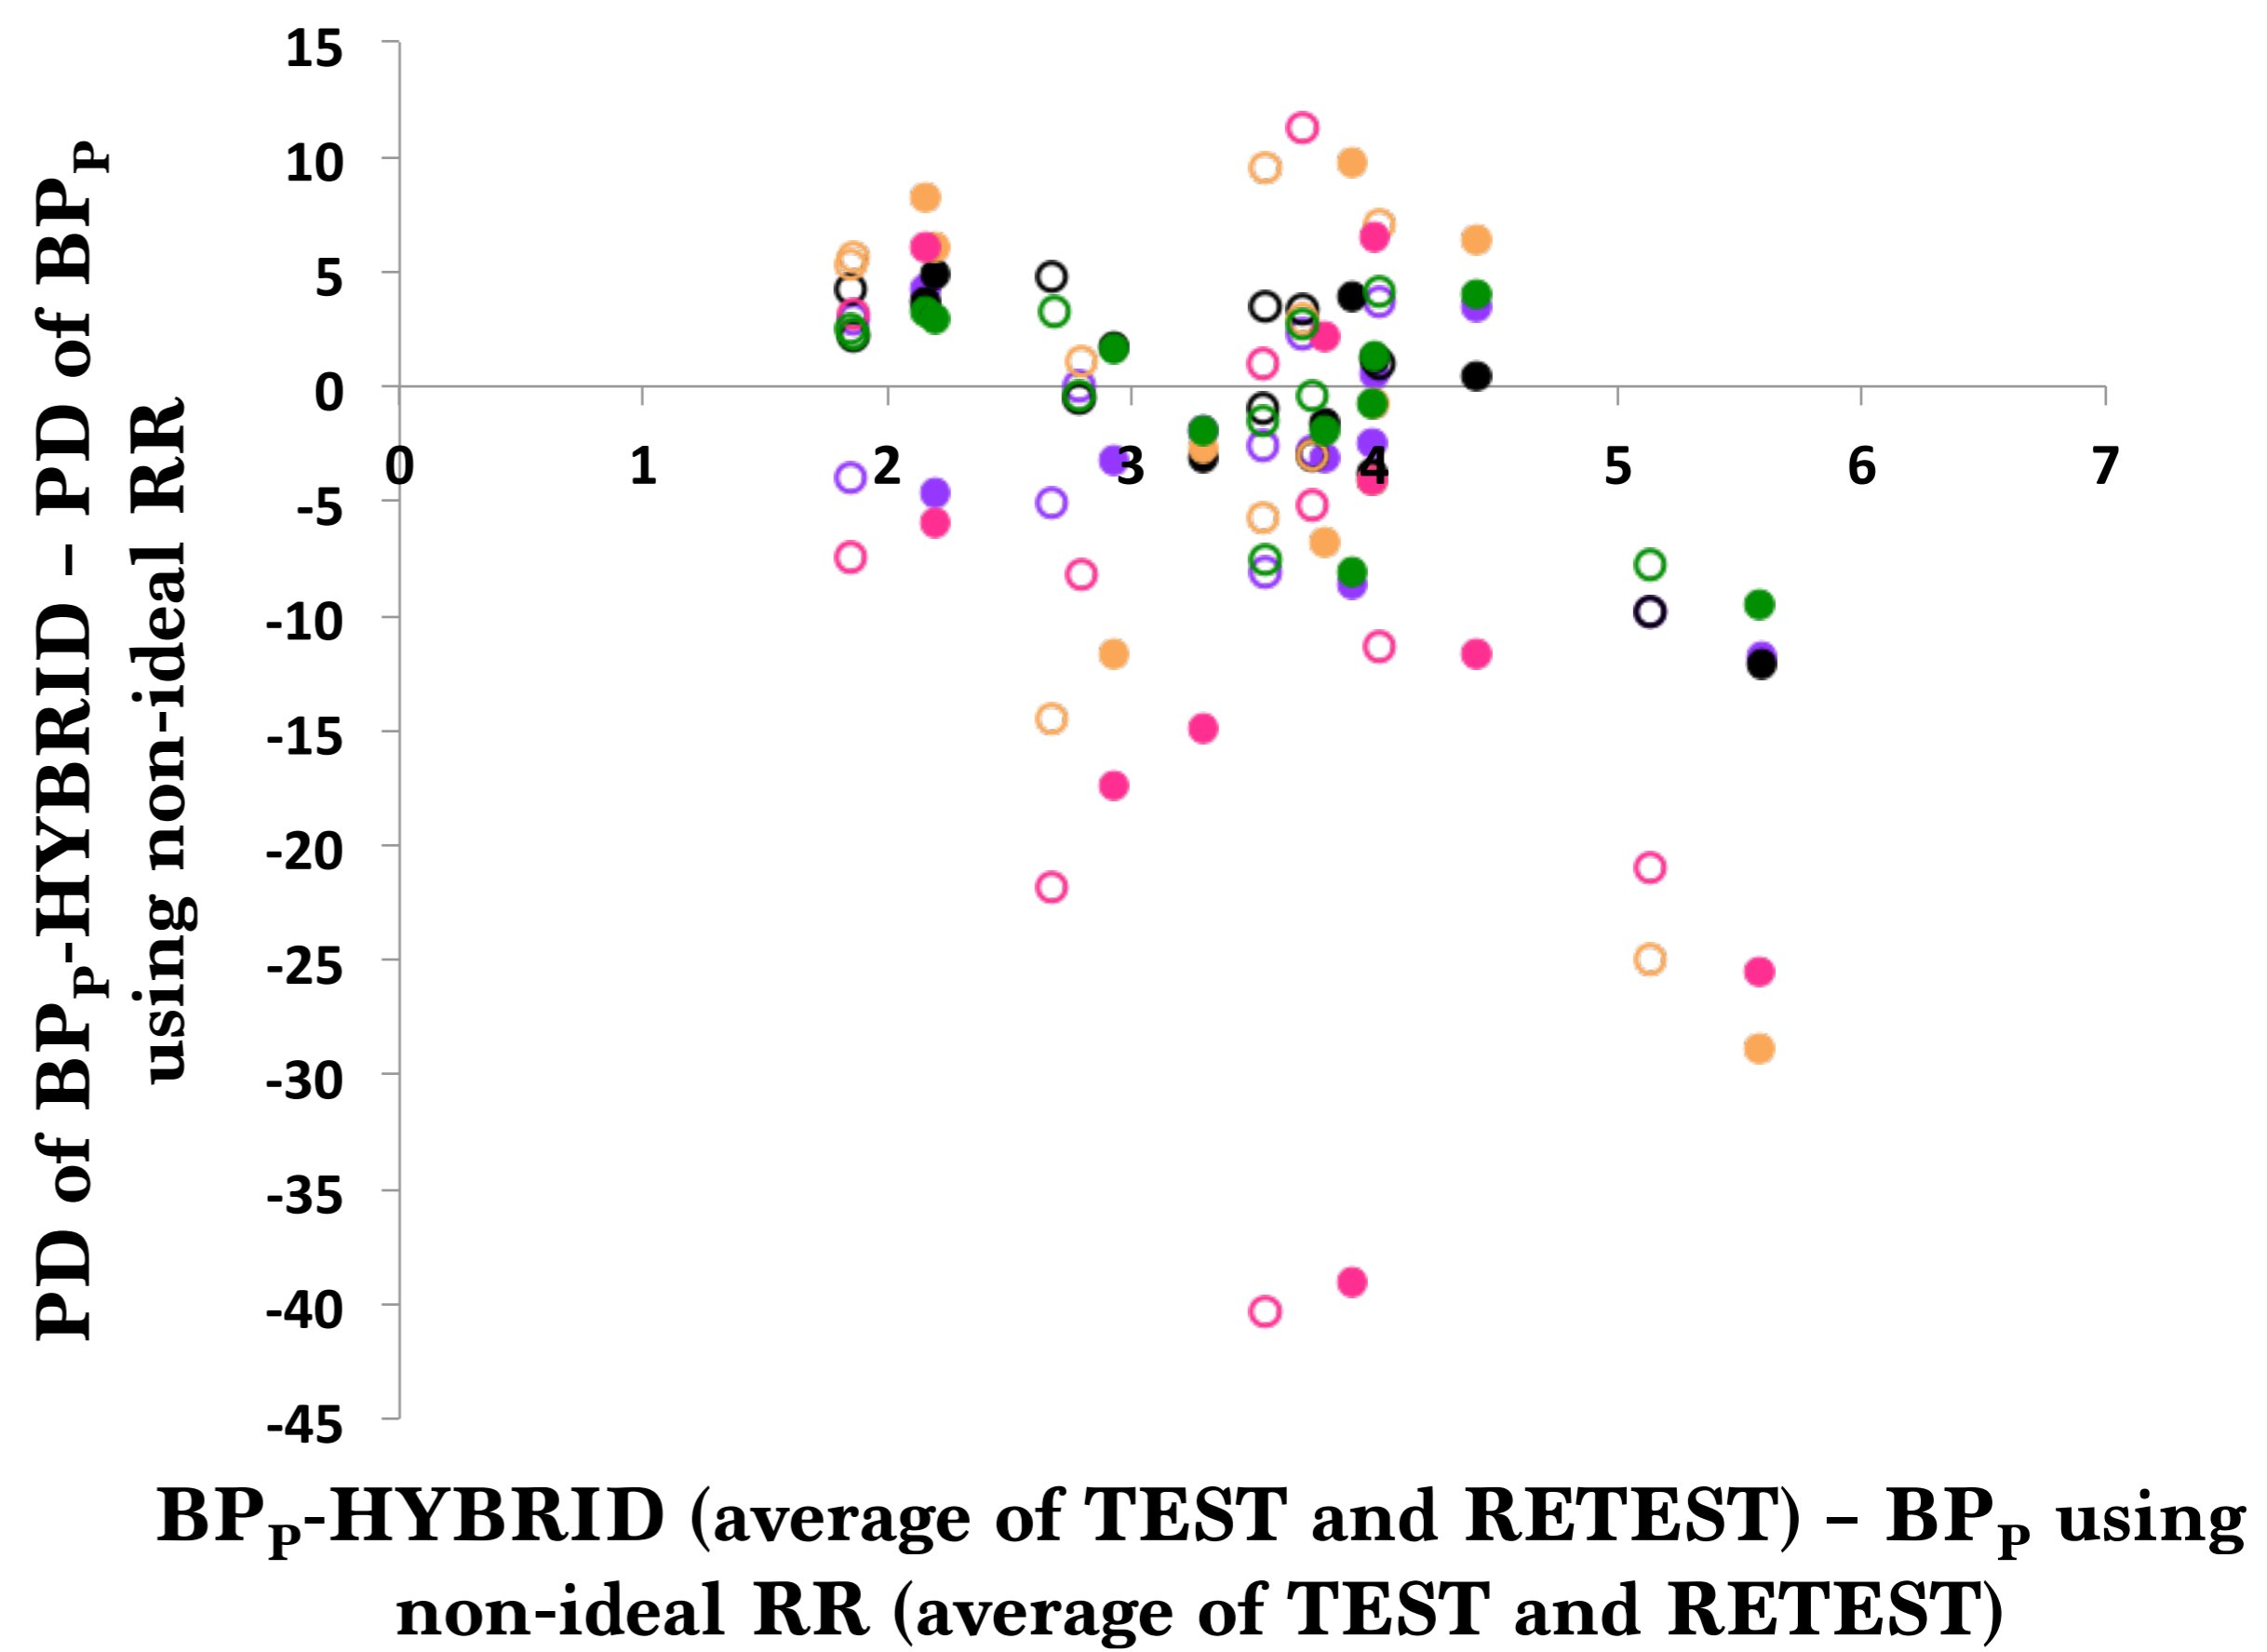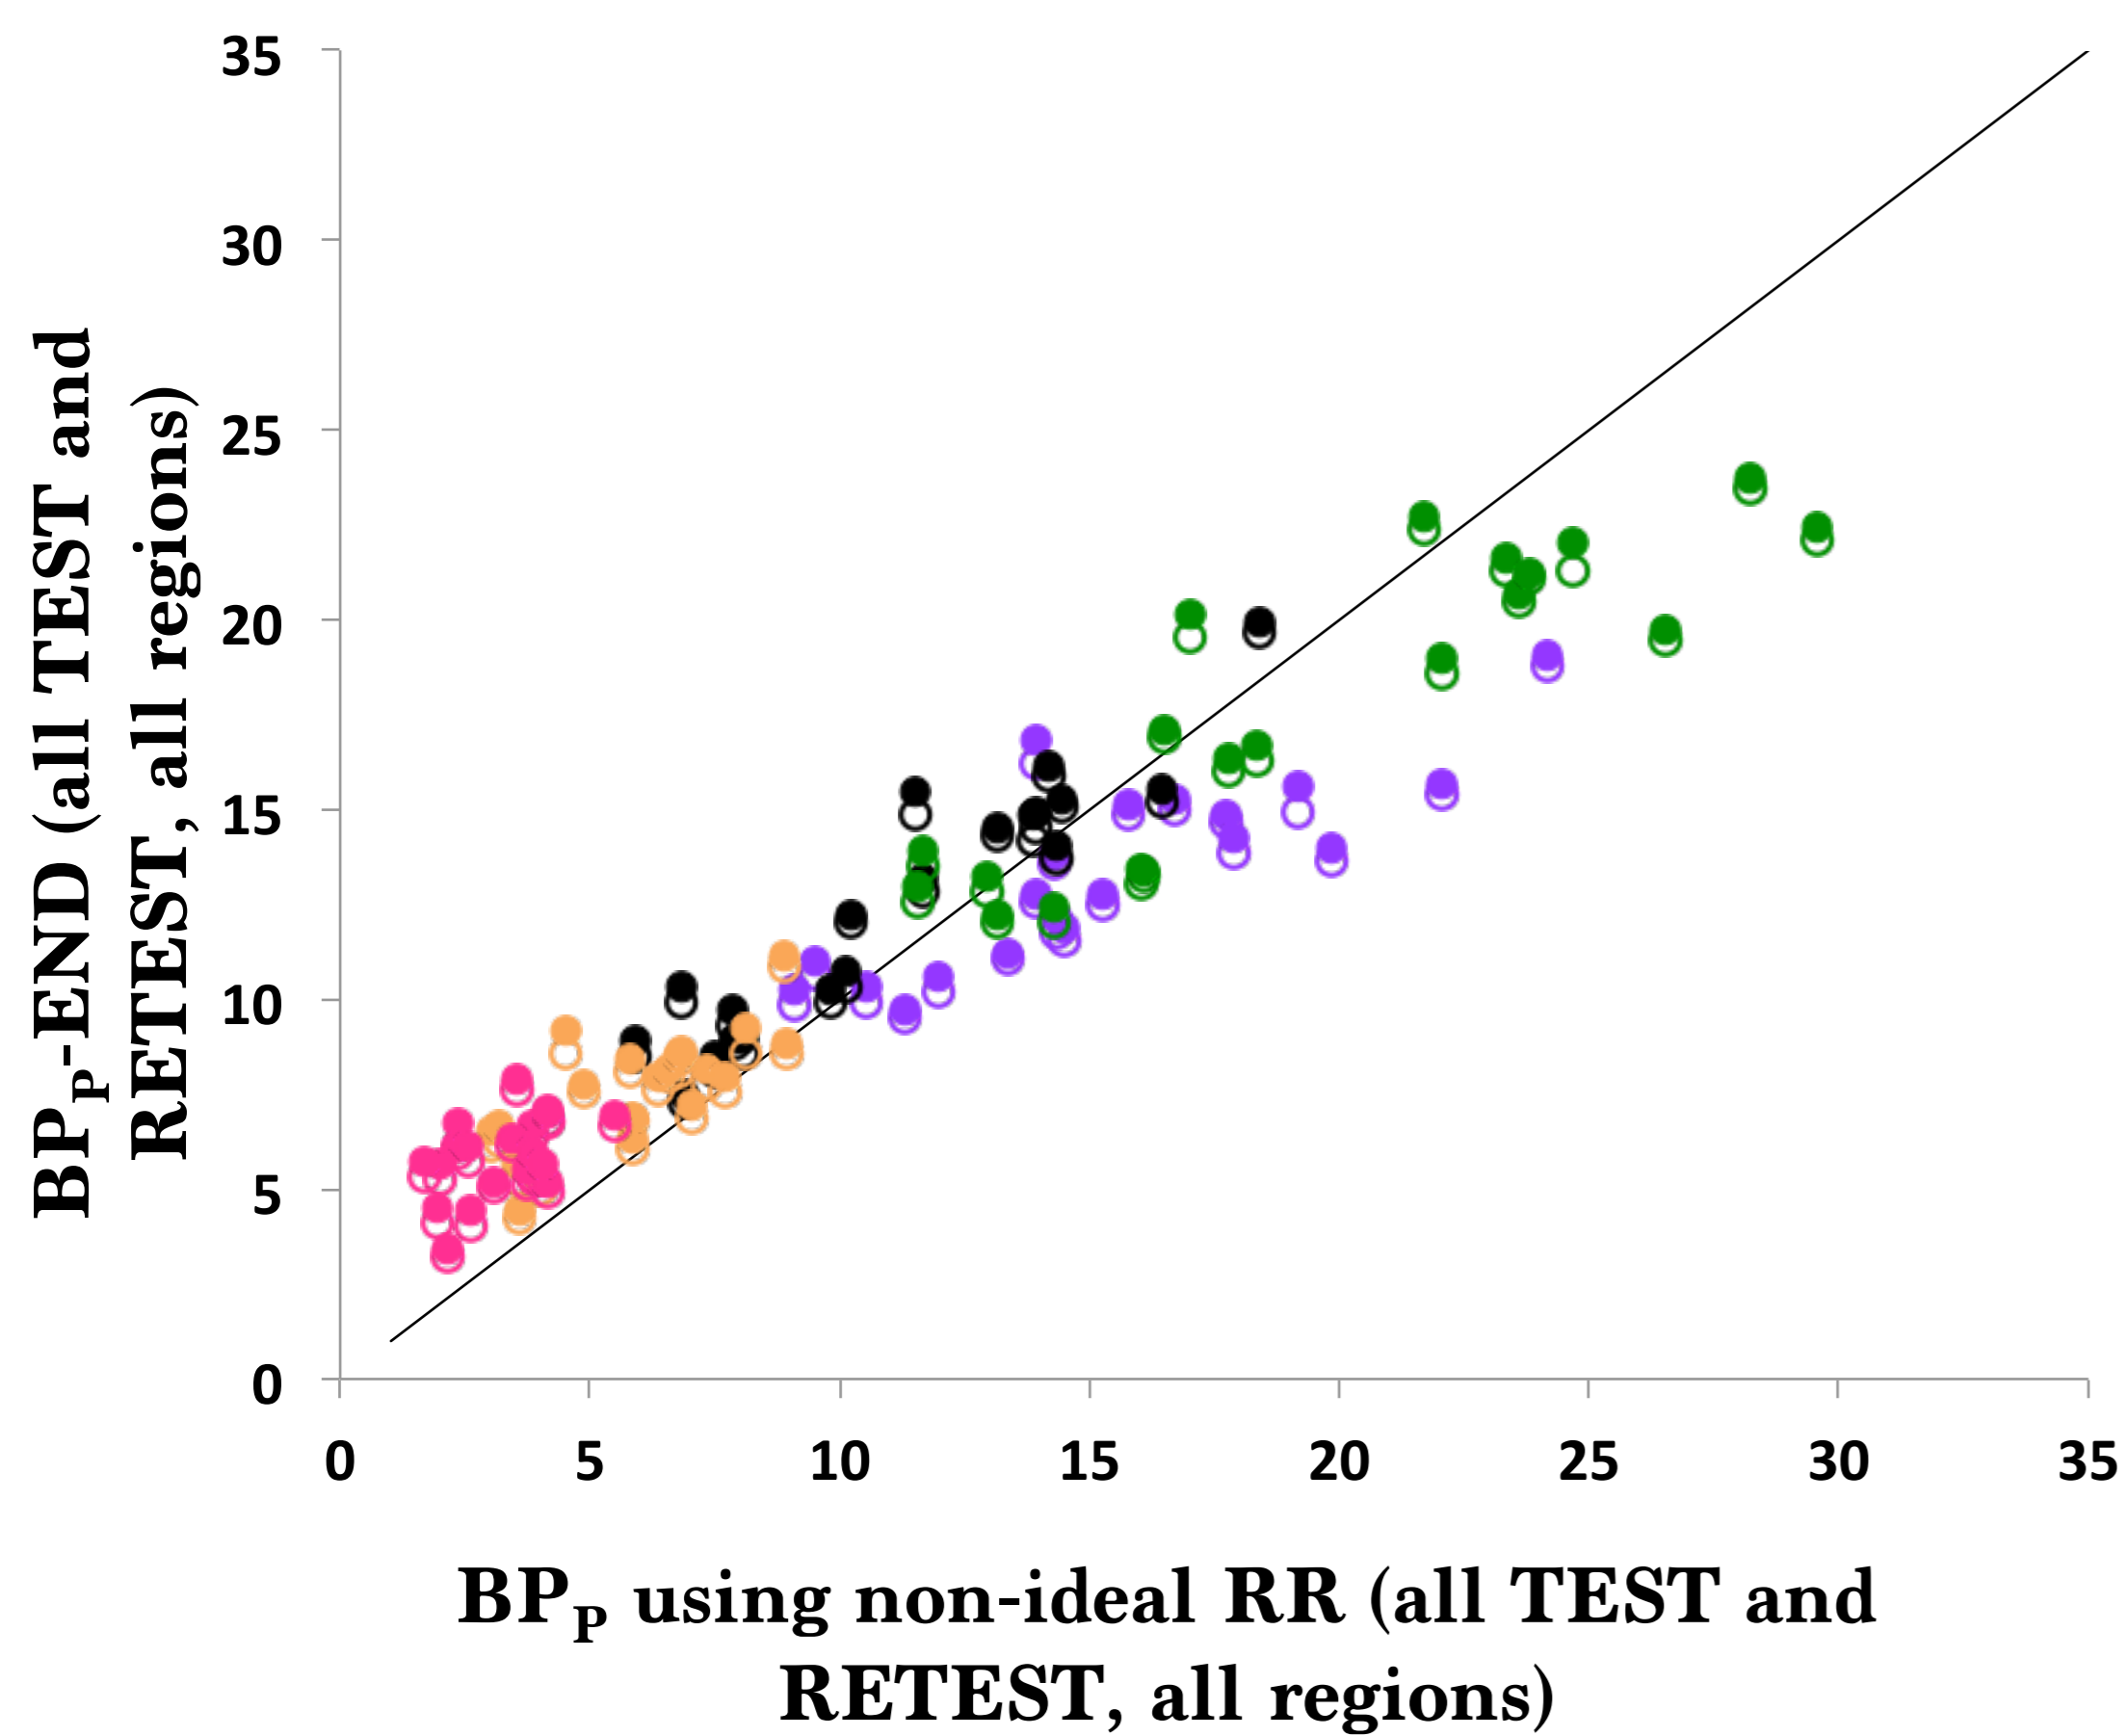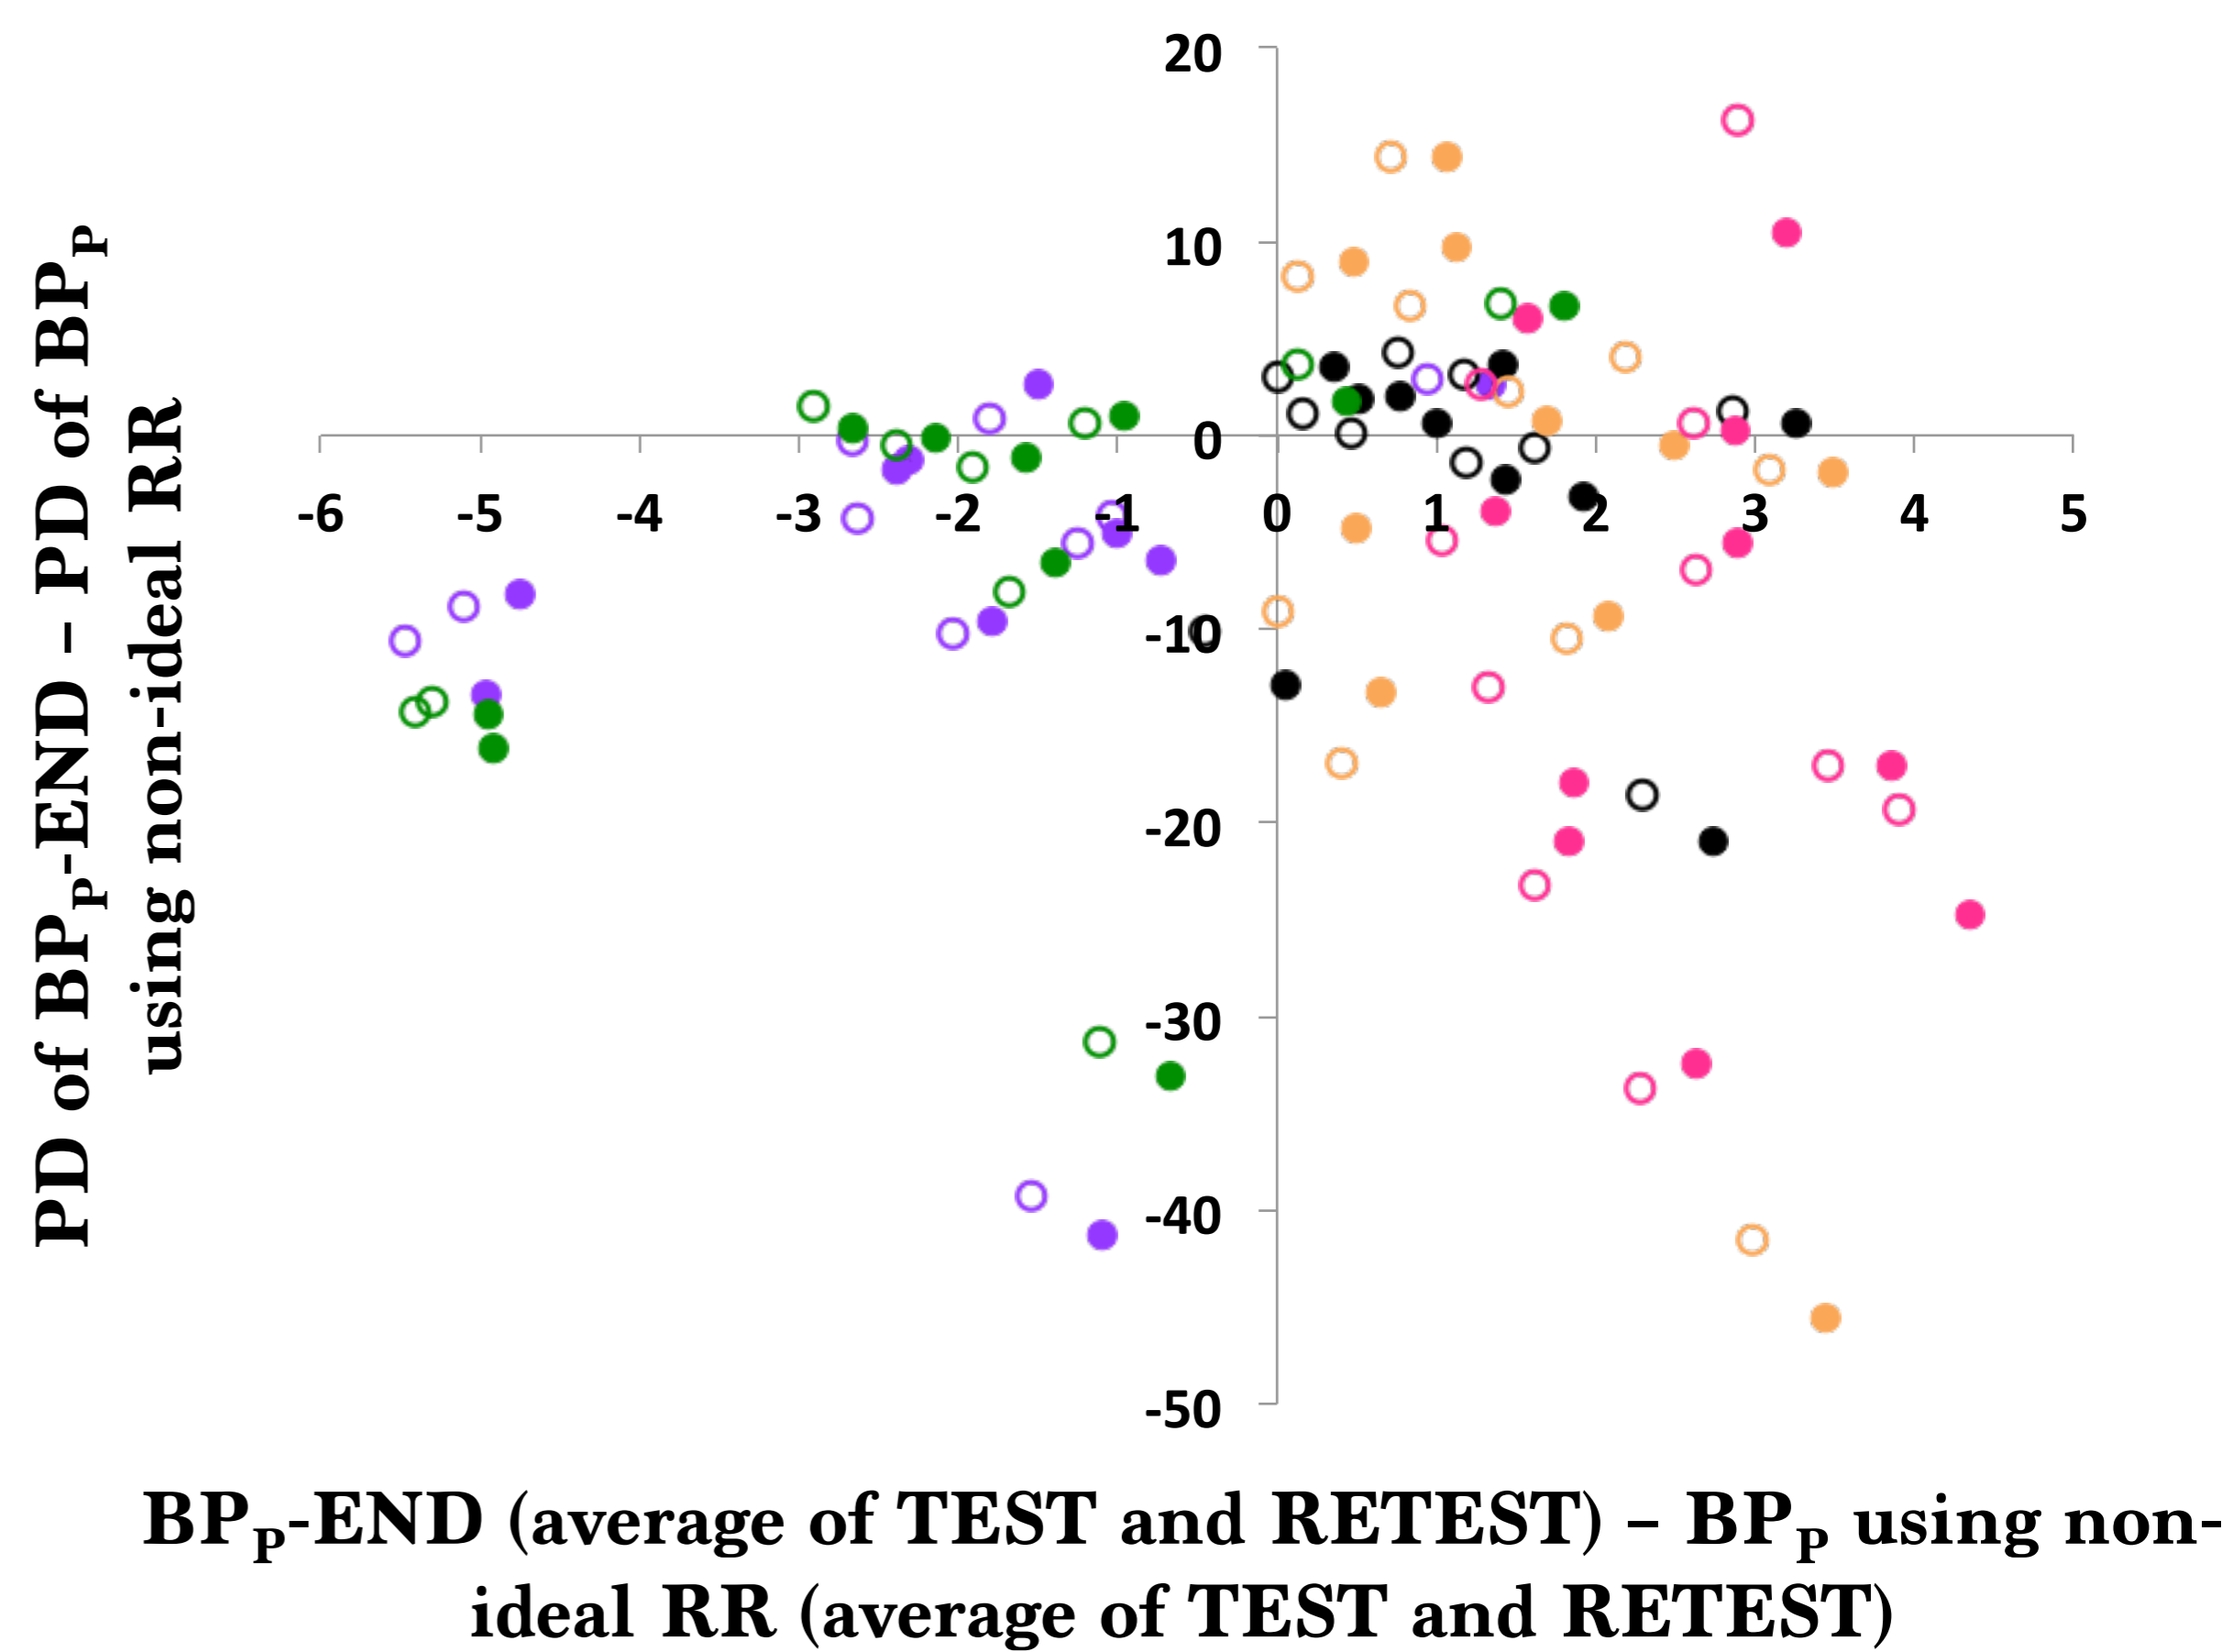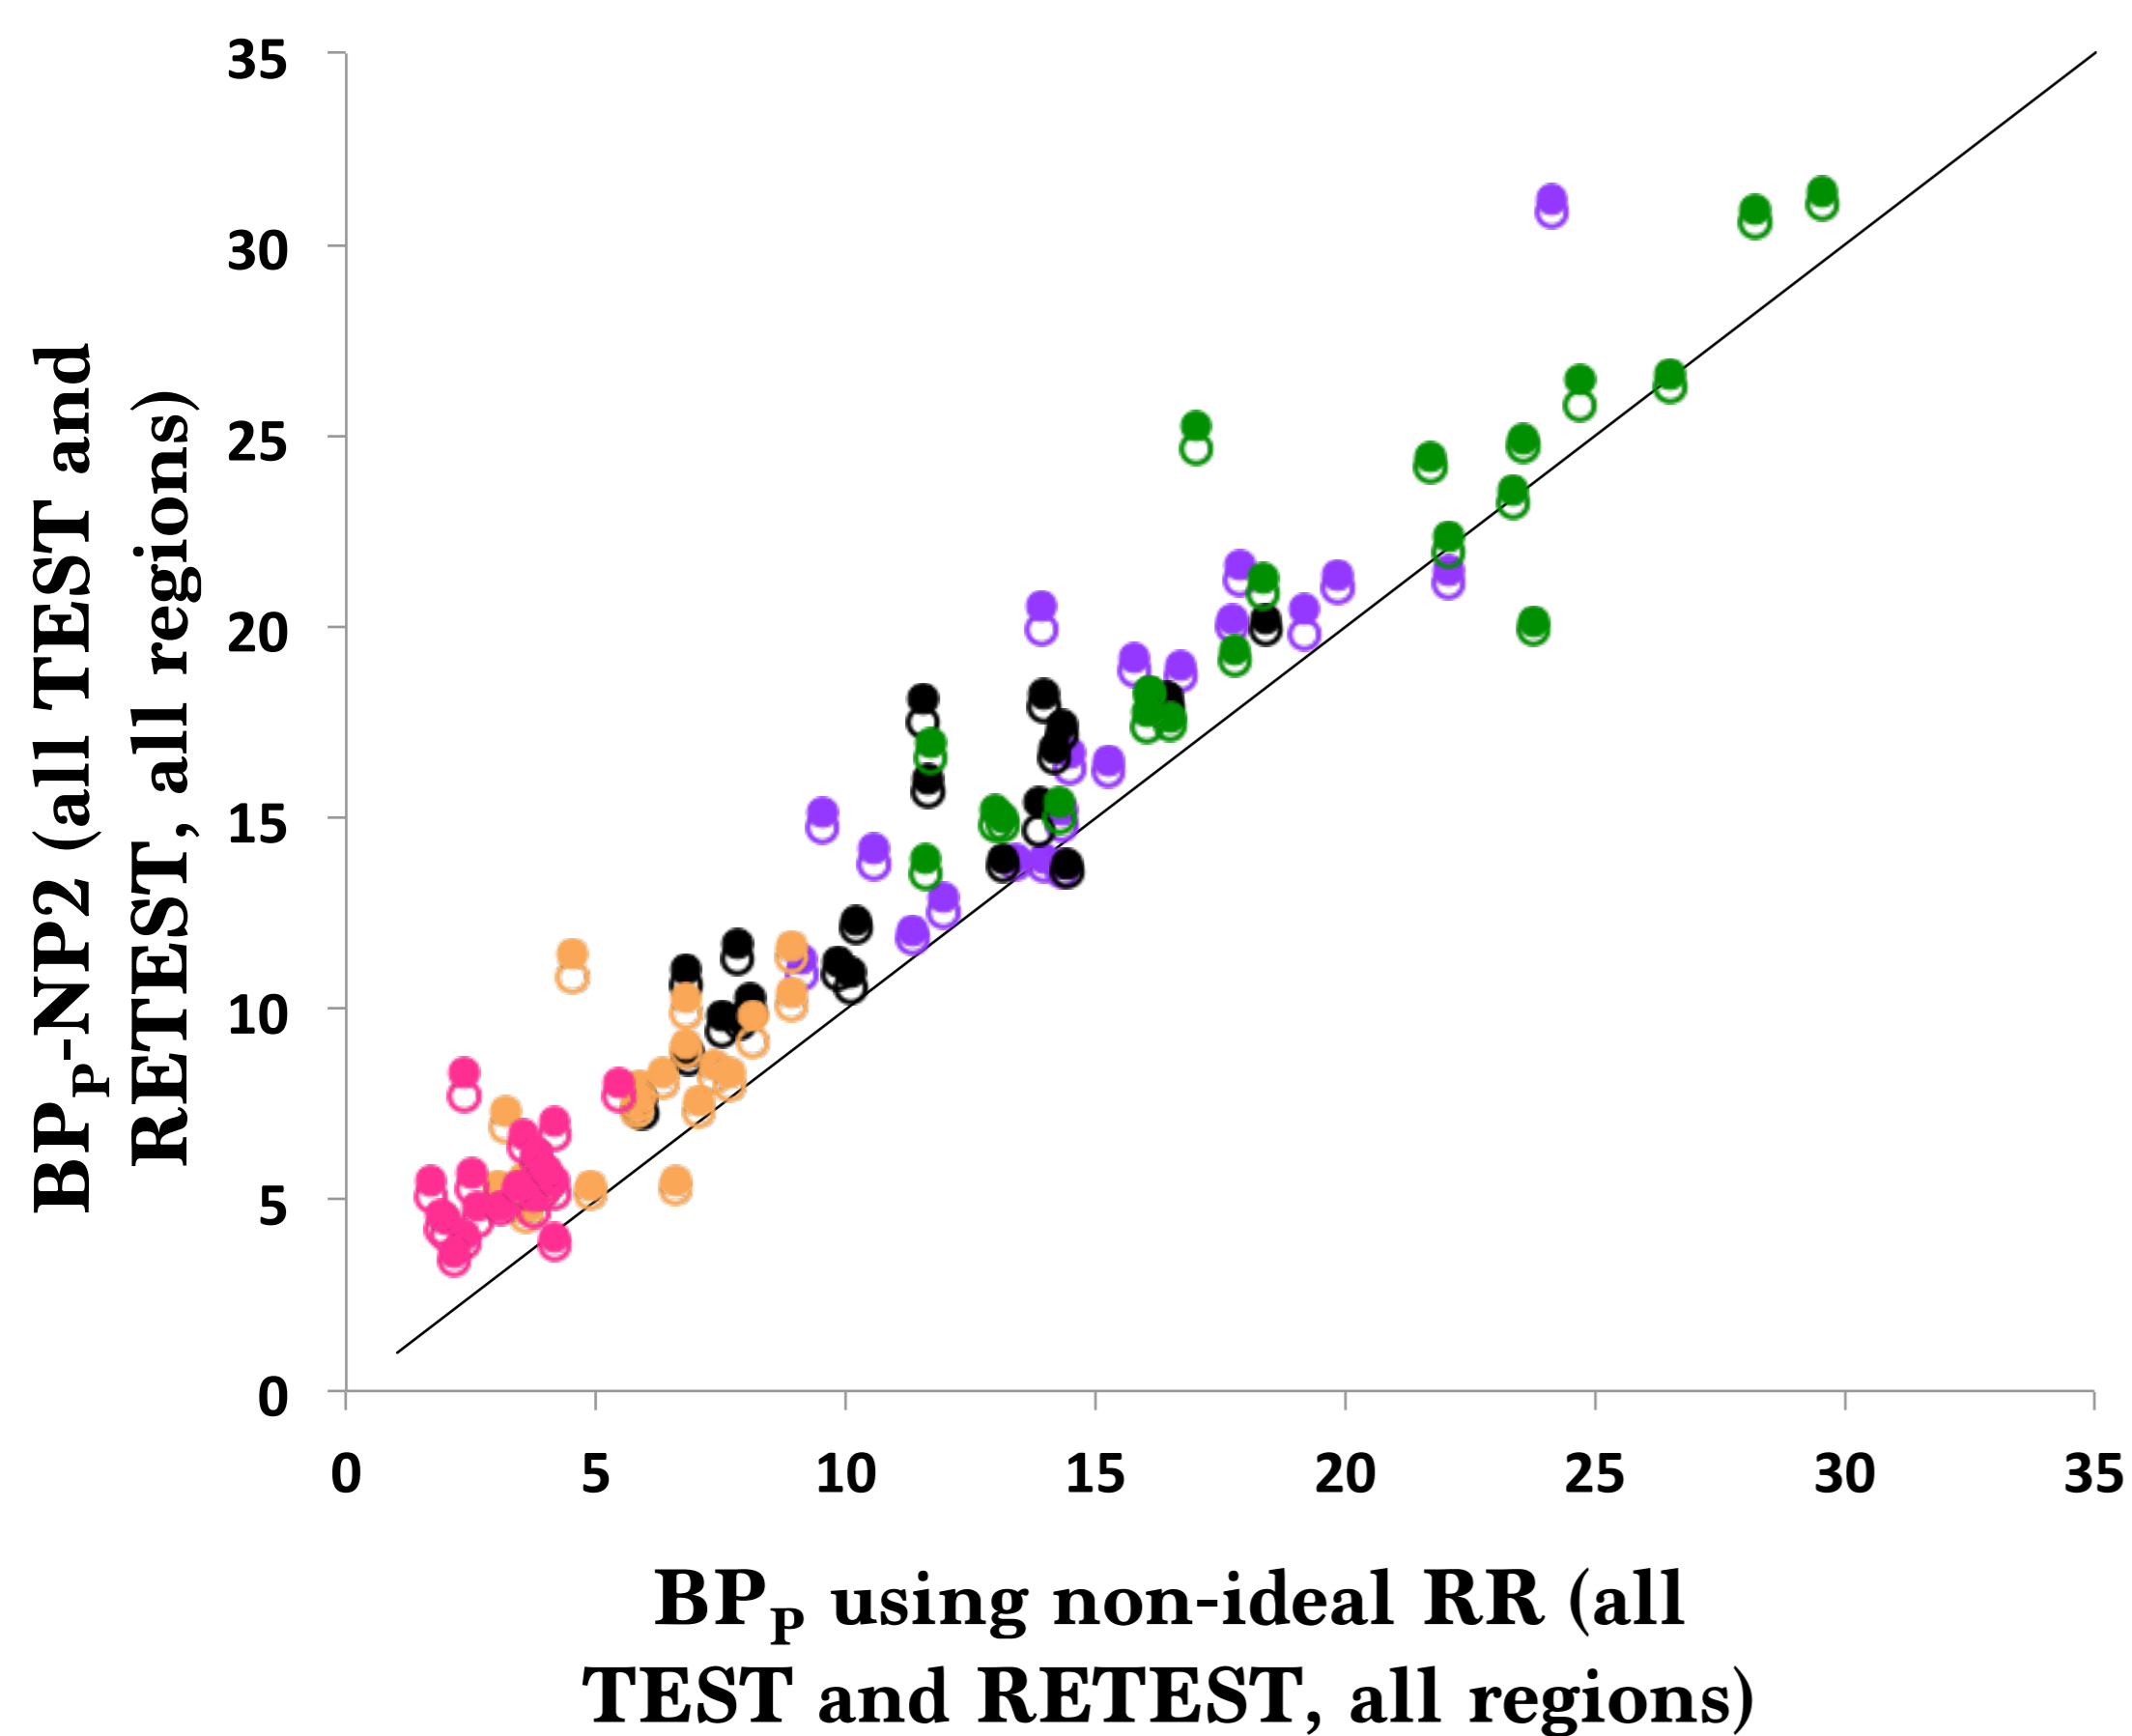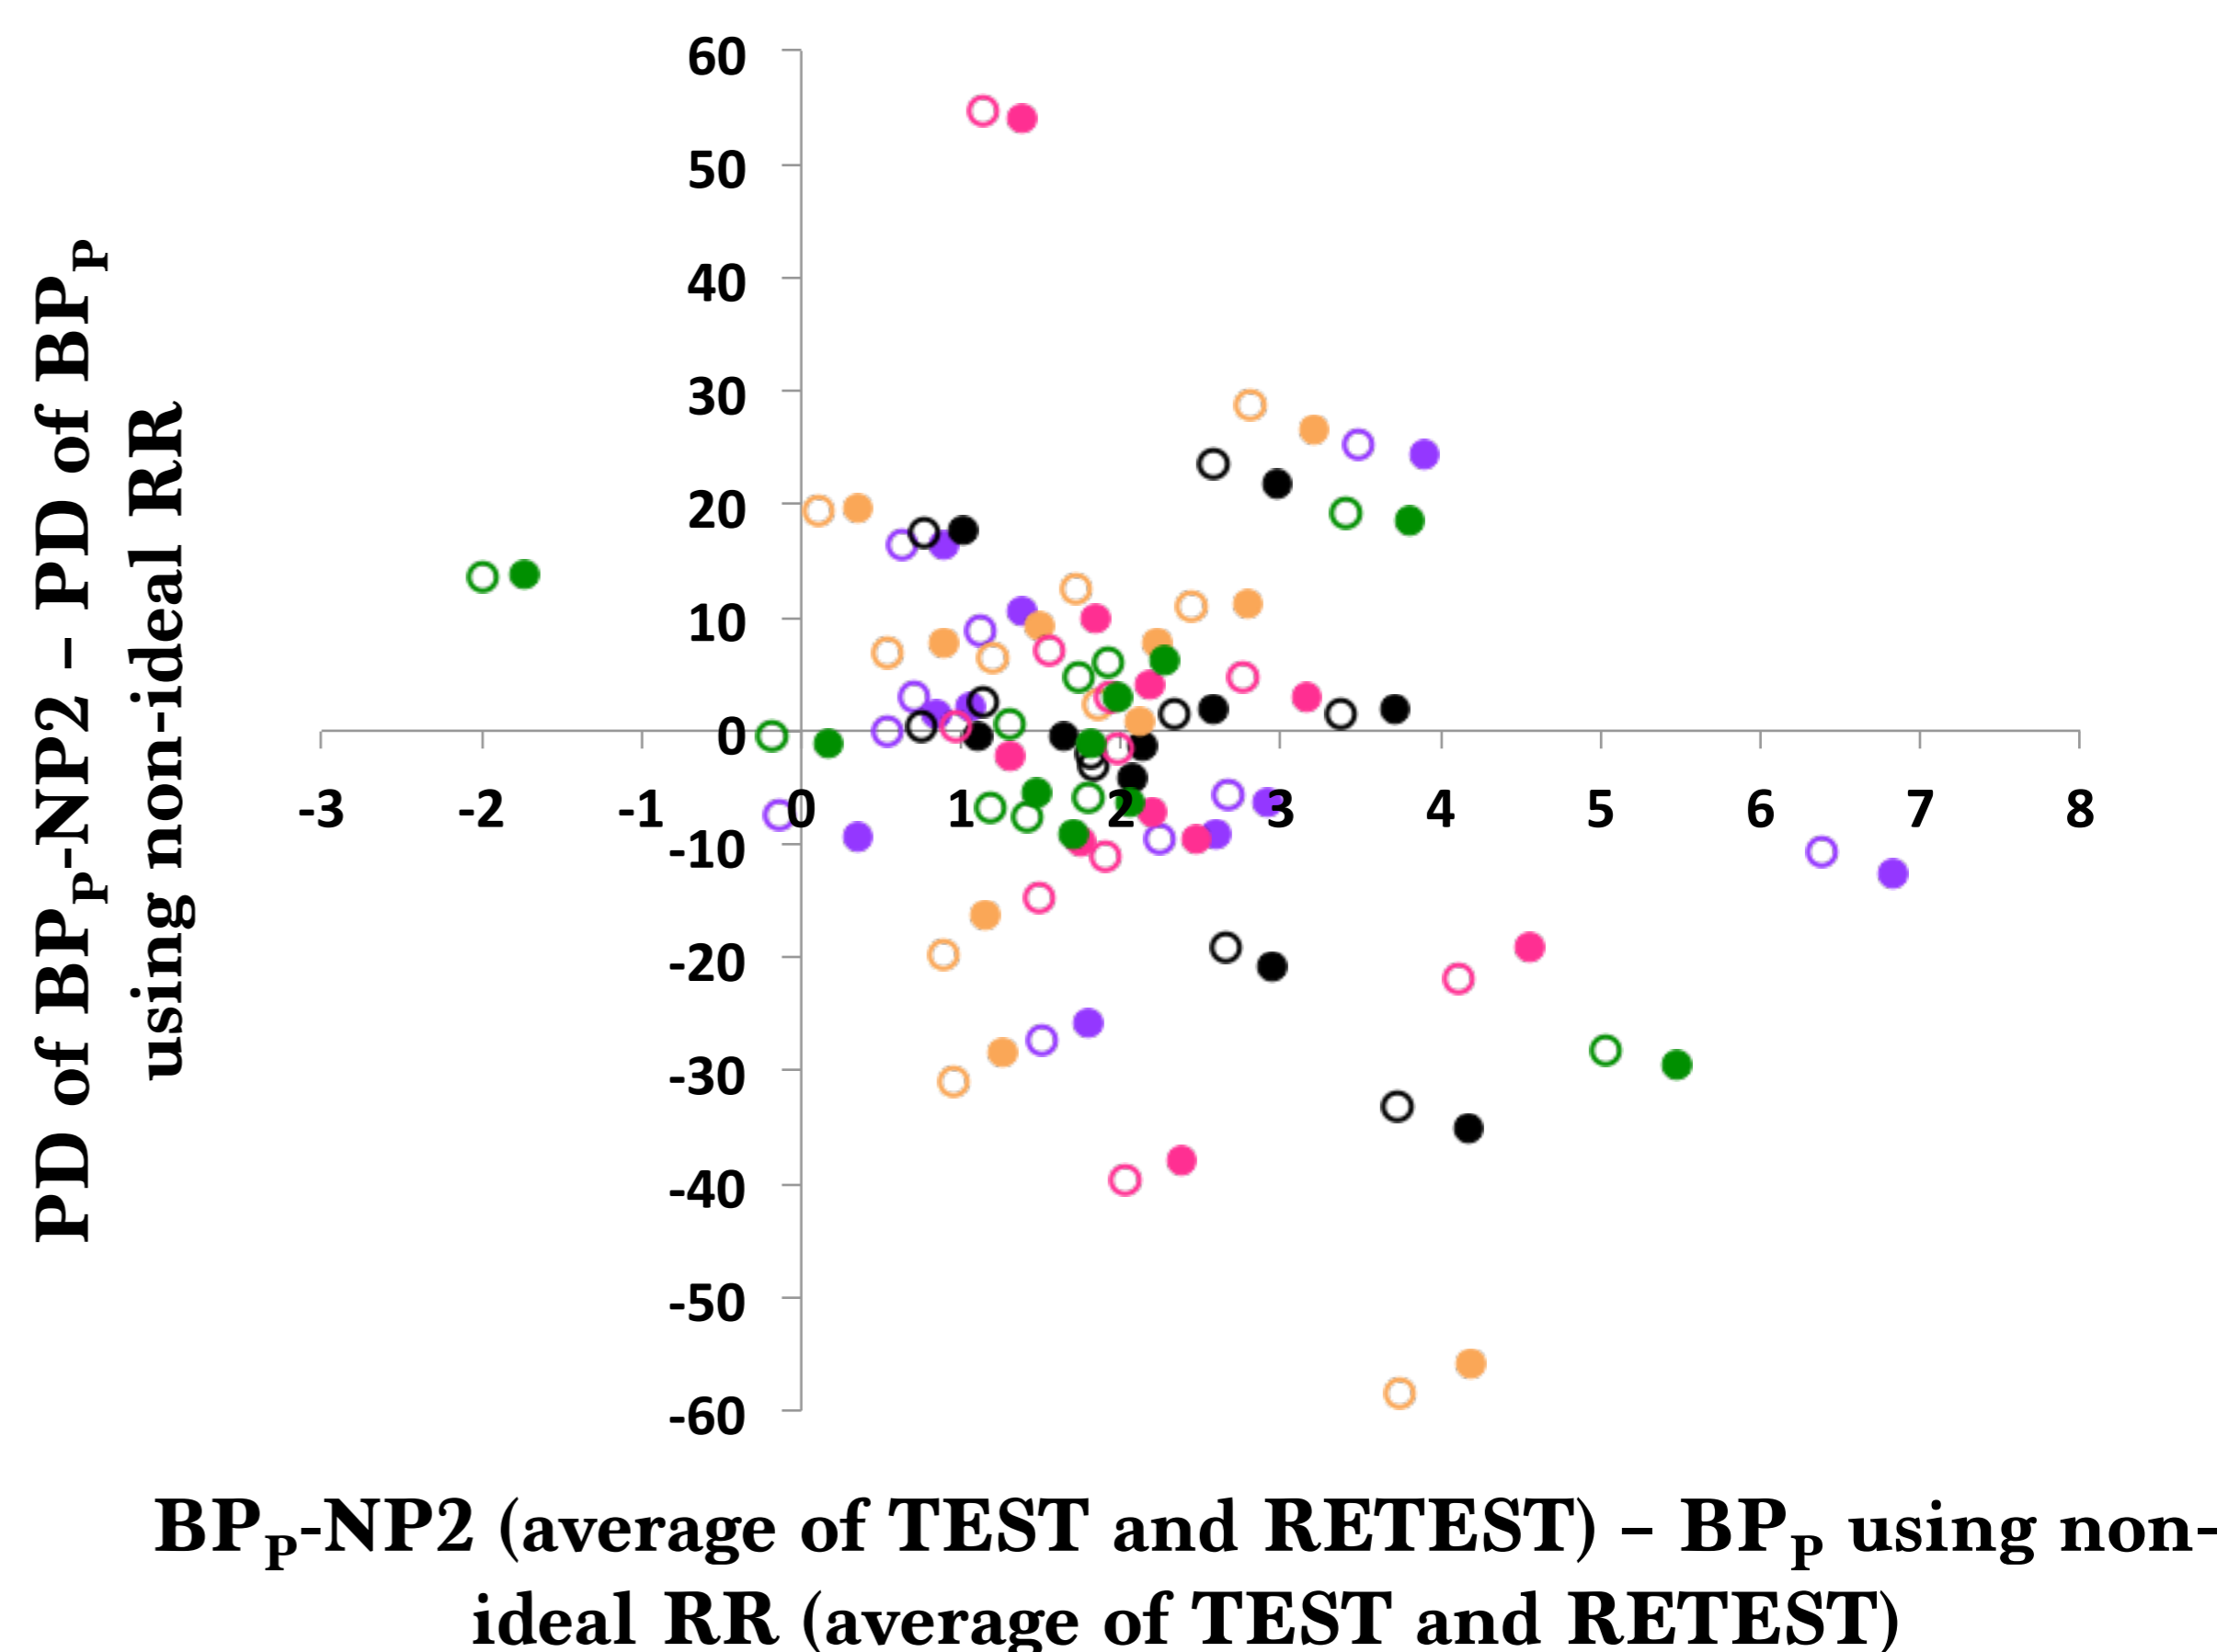

Supplement: pone.0176636.s003.pdf [file pone.0176636.s003.pdf]
