# Supplementary material for: A hybrid deconvolution approach for estimation of in vivo non-displaceable binding for brain PET targets without a reference region
Source: PubMed Central journal article supplement (PMC5411064; doi:10.1371/journal.pone.0176636), 2017-05-01

# [<sup>11</sup>C]DASB

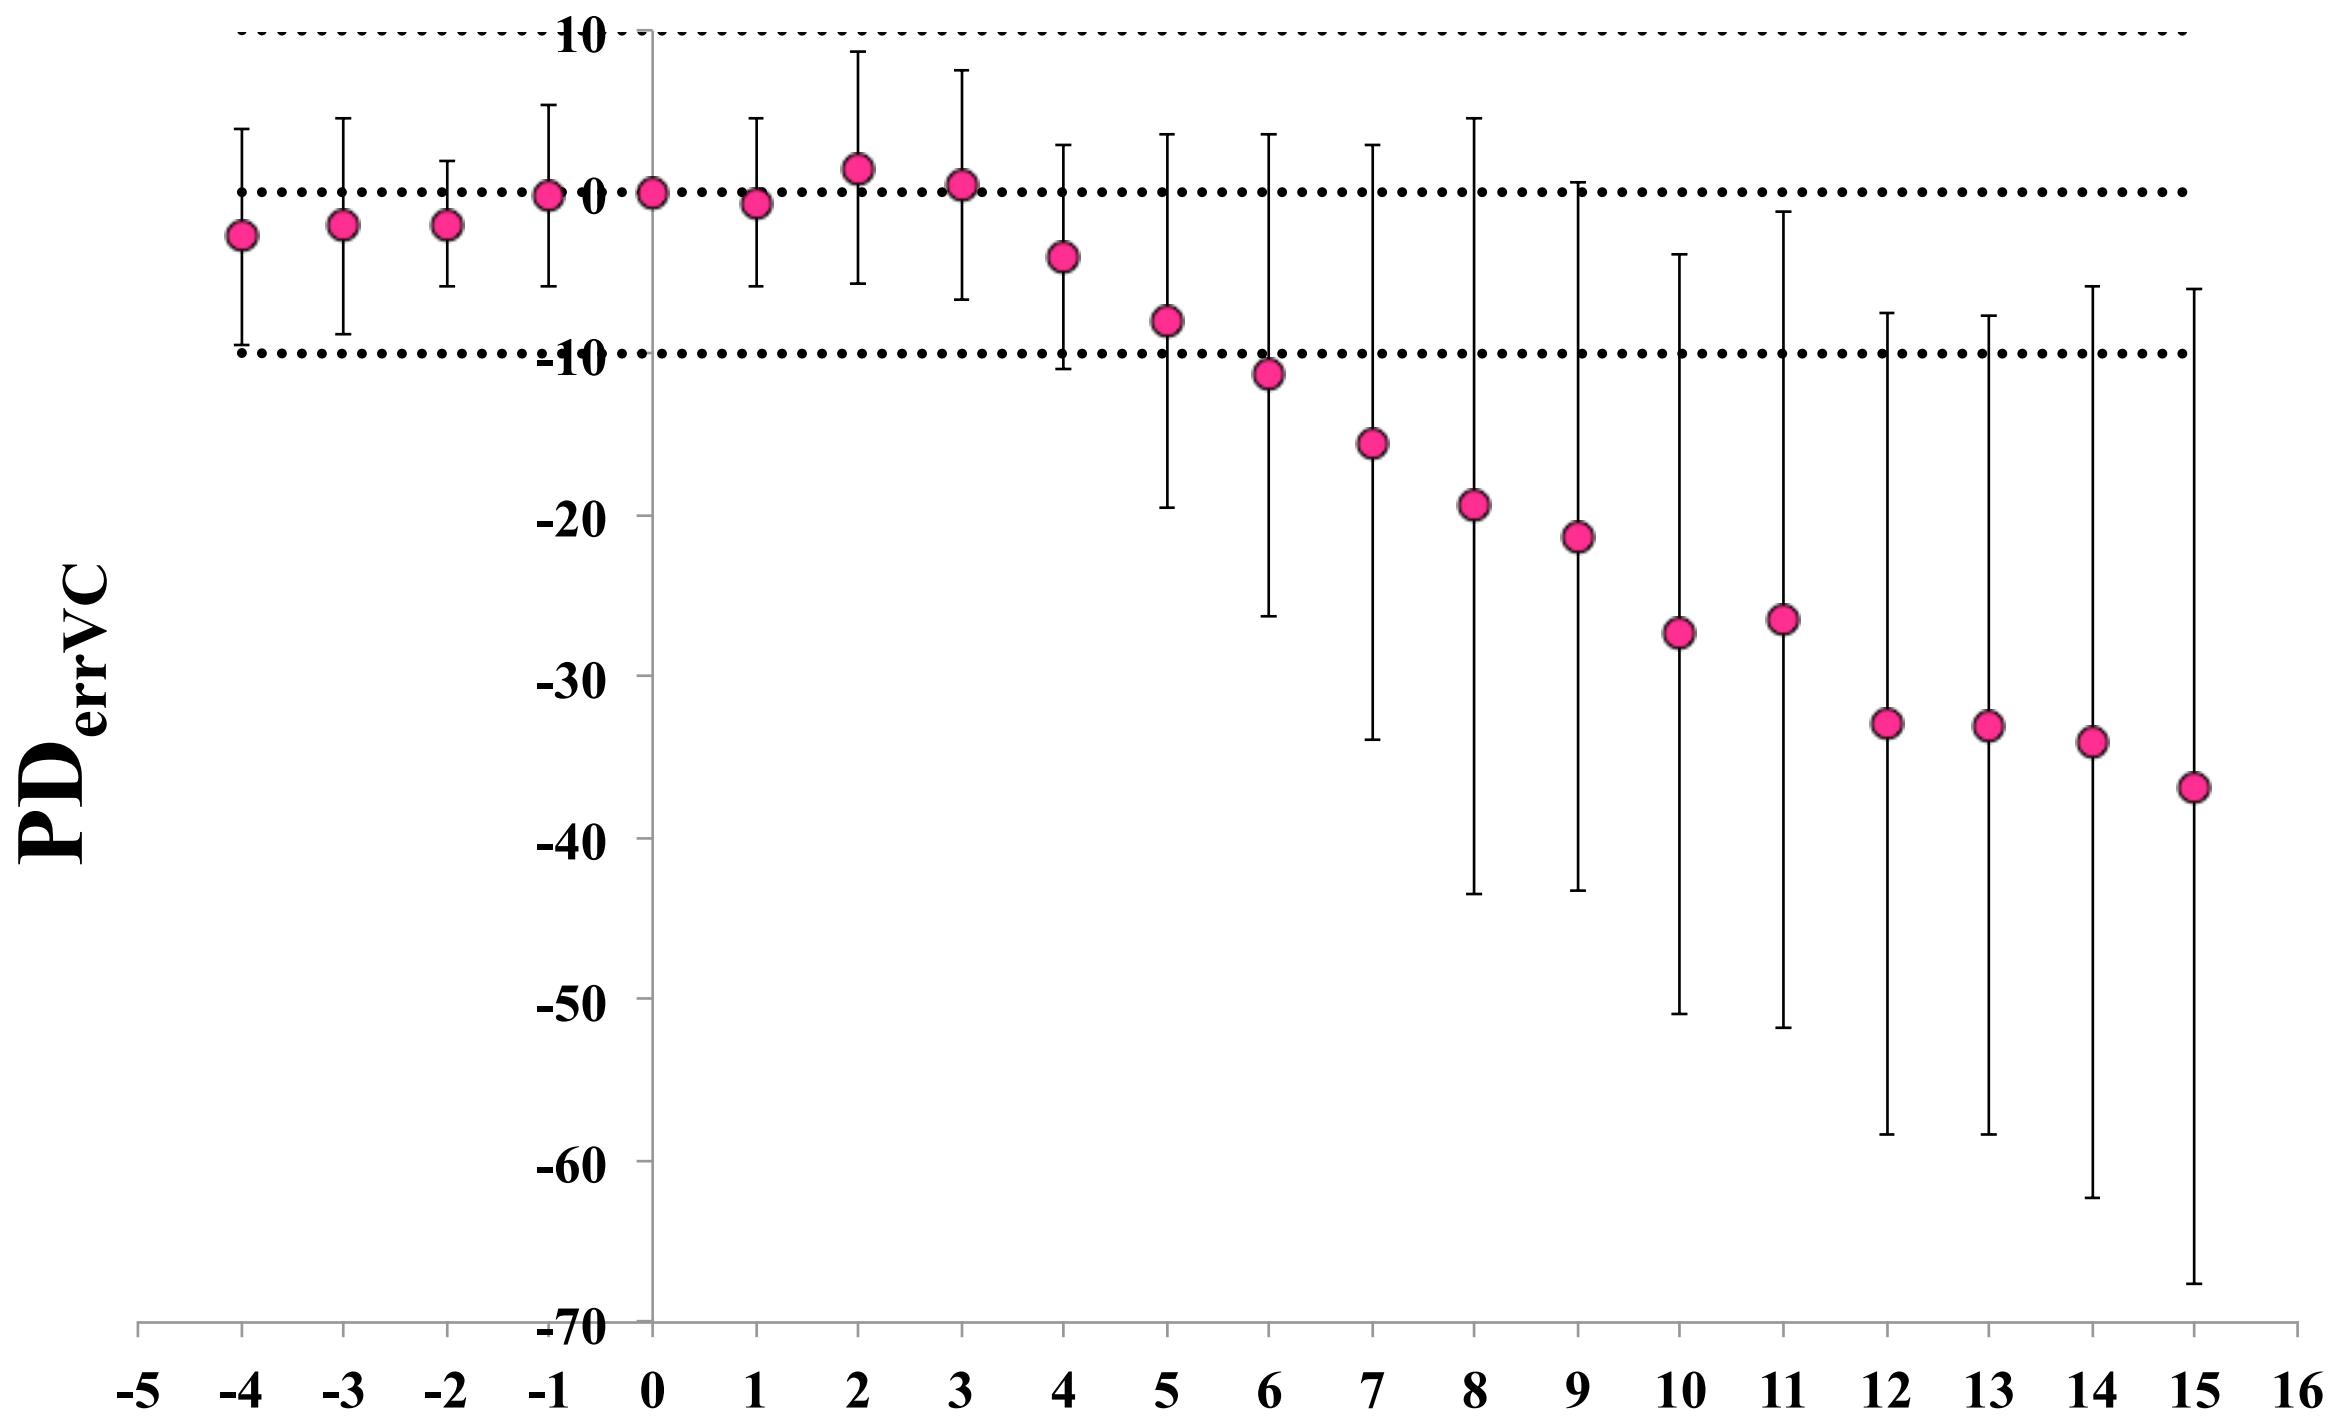

# [<sup>11</sup>C]CUMI-101

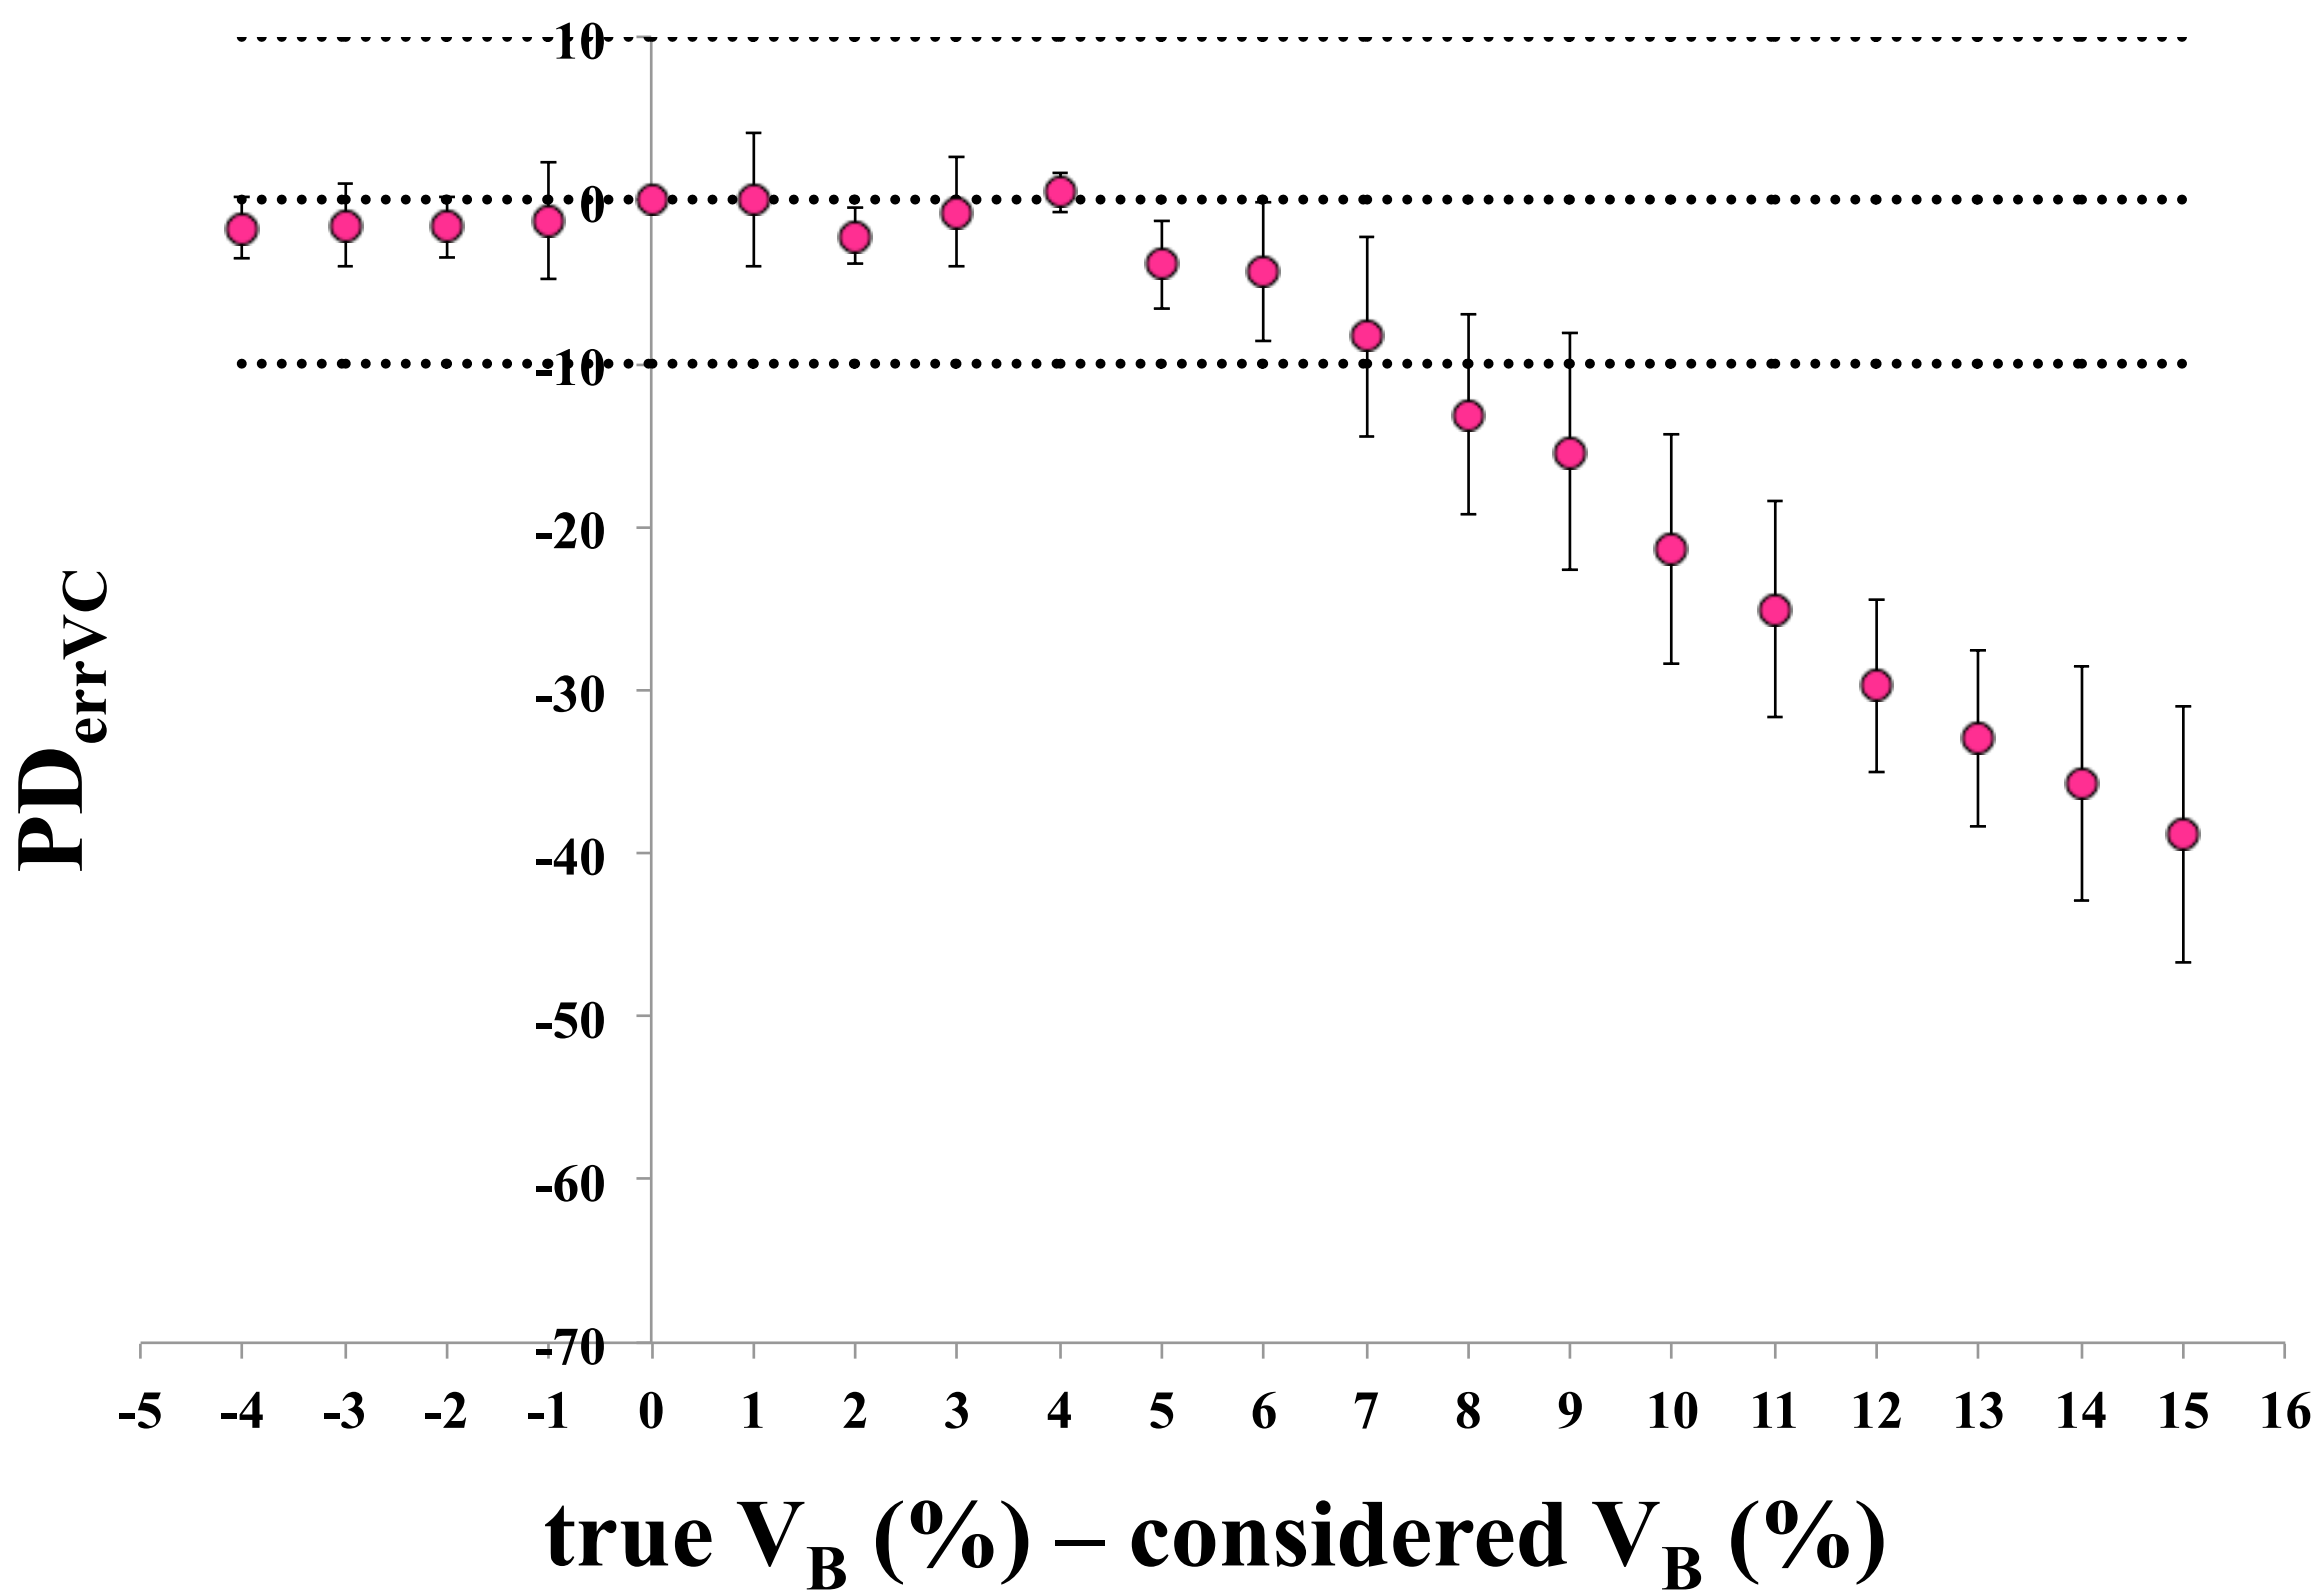

Supplement: pone.0176636.s005.pdf [file pone.0176636.s005.pdf]
