# Supplementary material for: A hybrid deconvolution approach for estimation of in vivo non-displaceable binding for brain PET targets without a reference region
Source: PubMed Central journal article supplement (PMC5411064; doi:10.1371/journal.pone.0176636), 2017-05-01
Supplement: pone.0176636.s007.pdf [file pone.0176636.s007.pdf]

# [<sup>11</sup>C]DASB

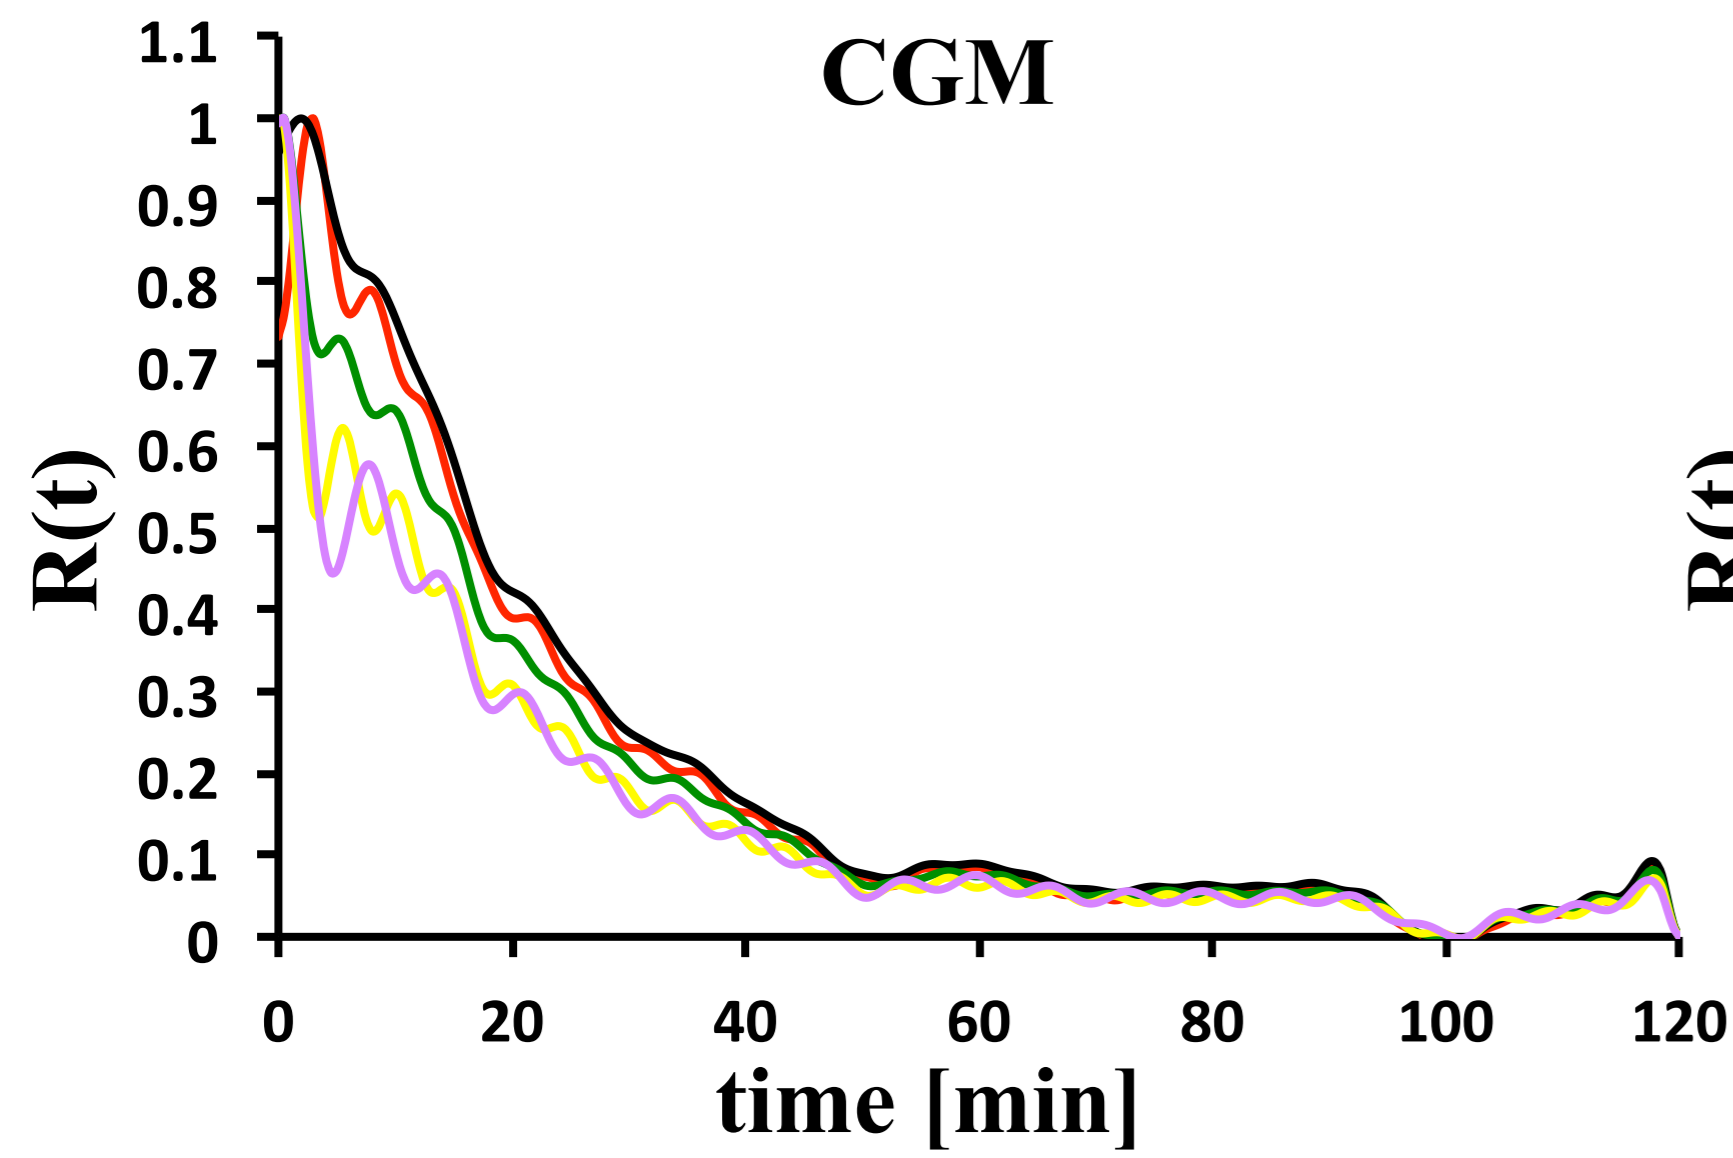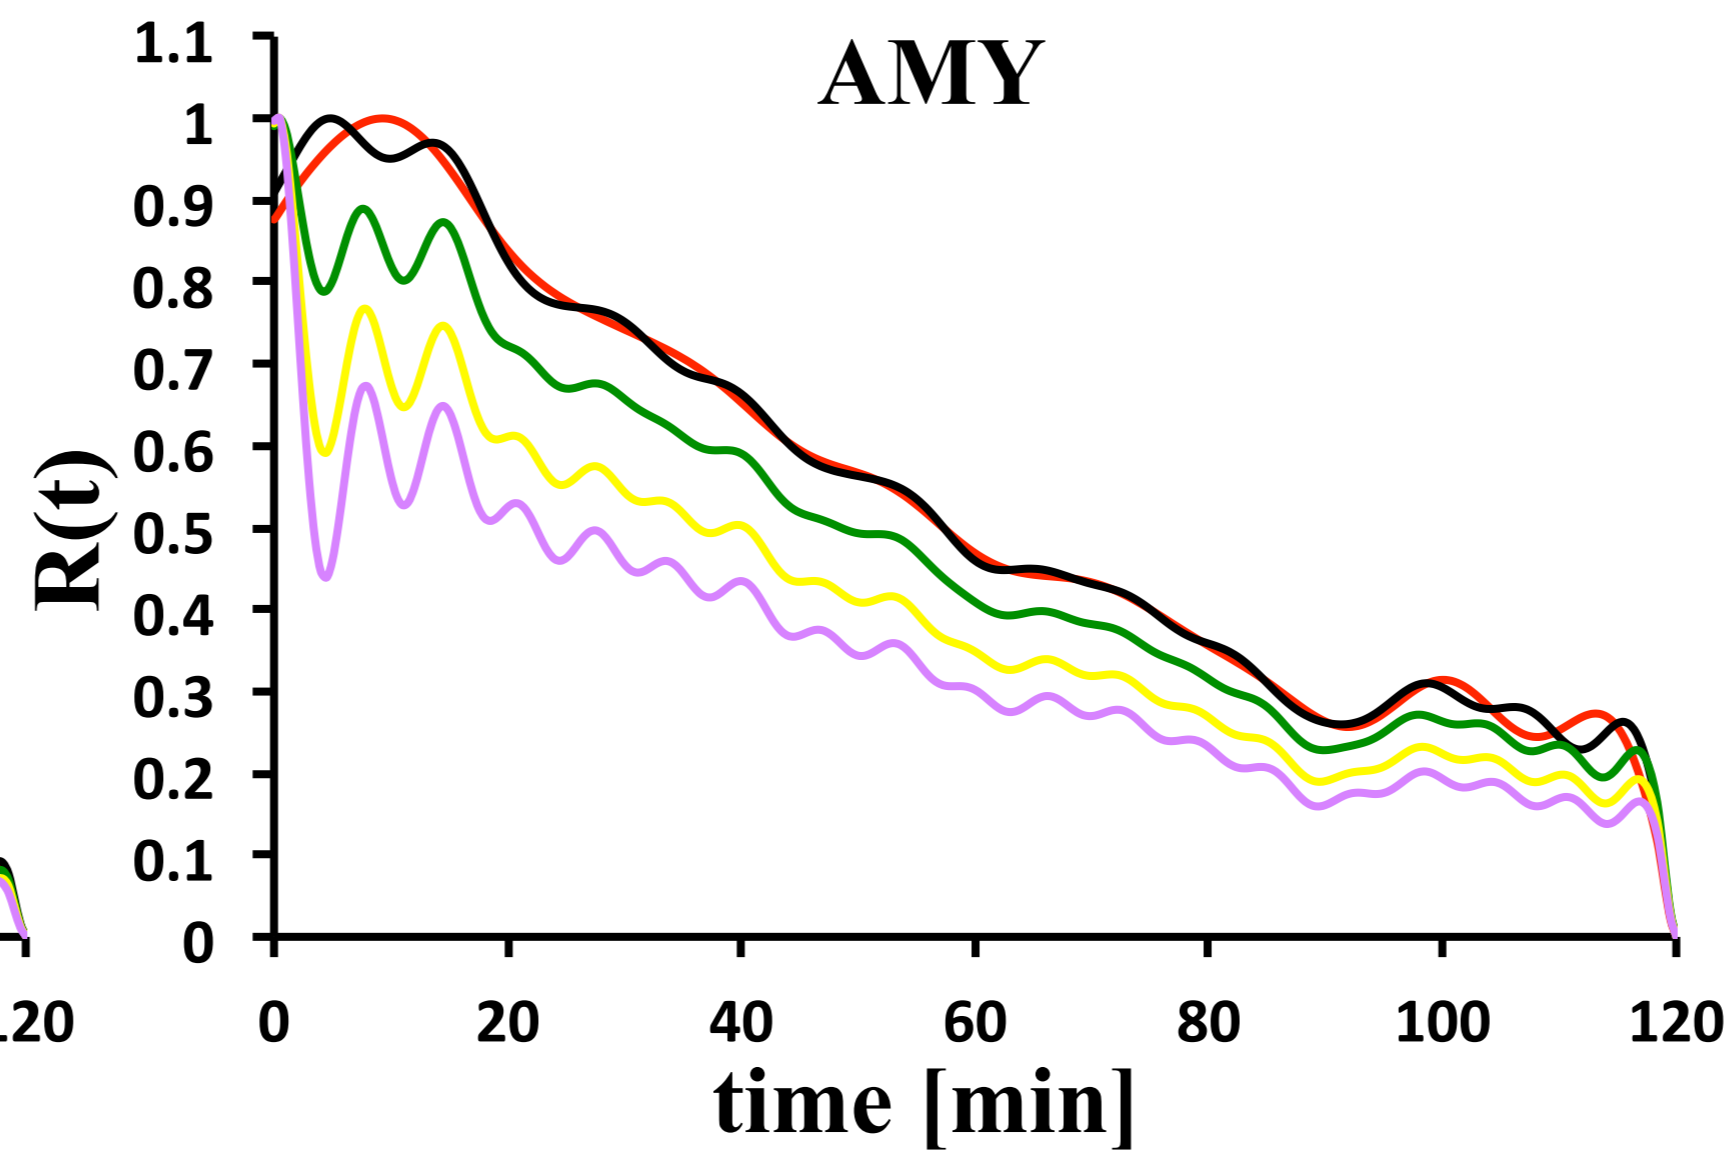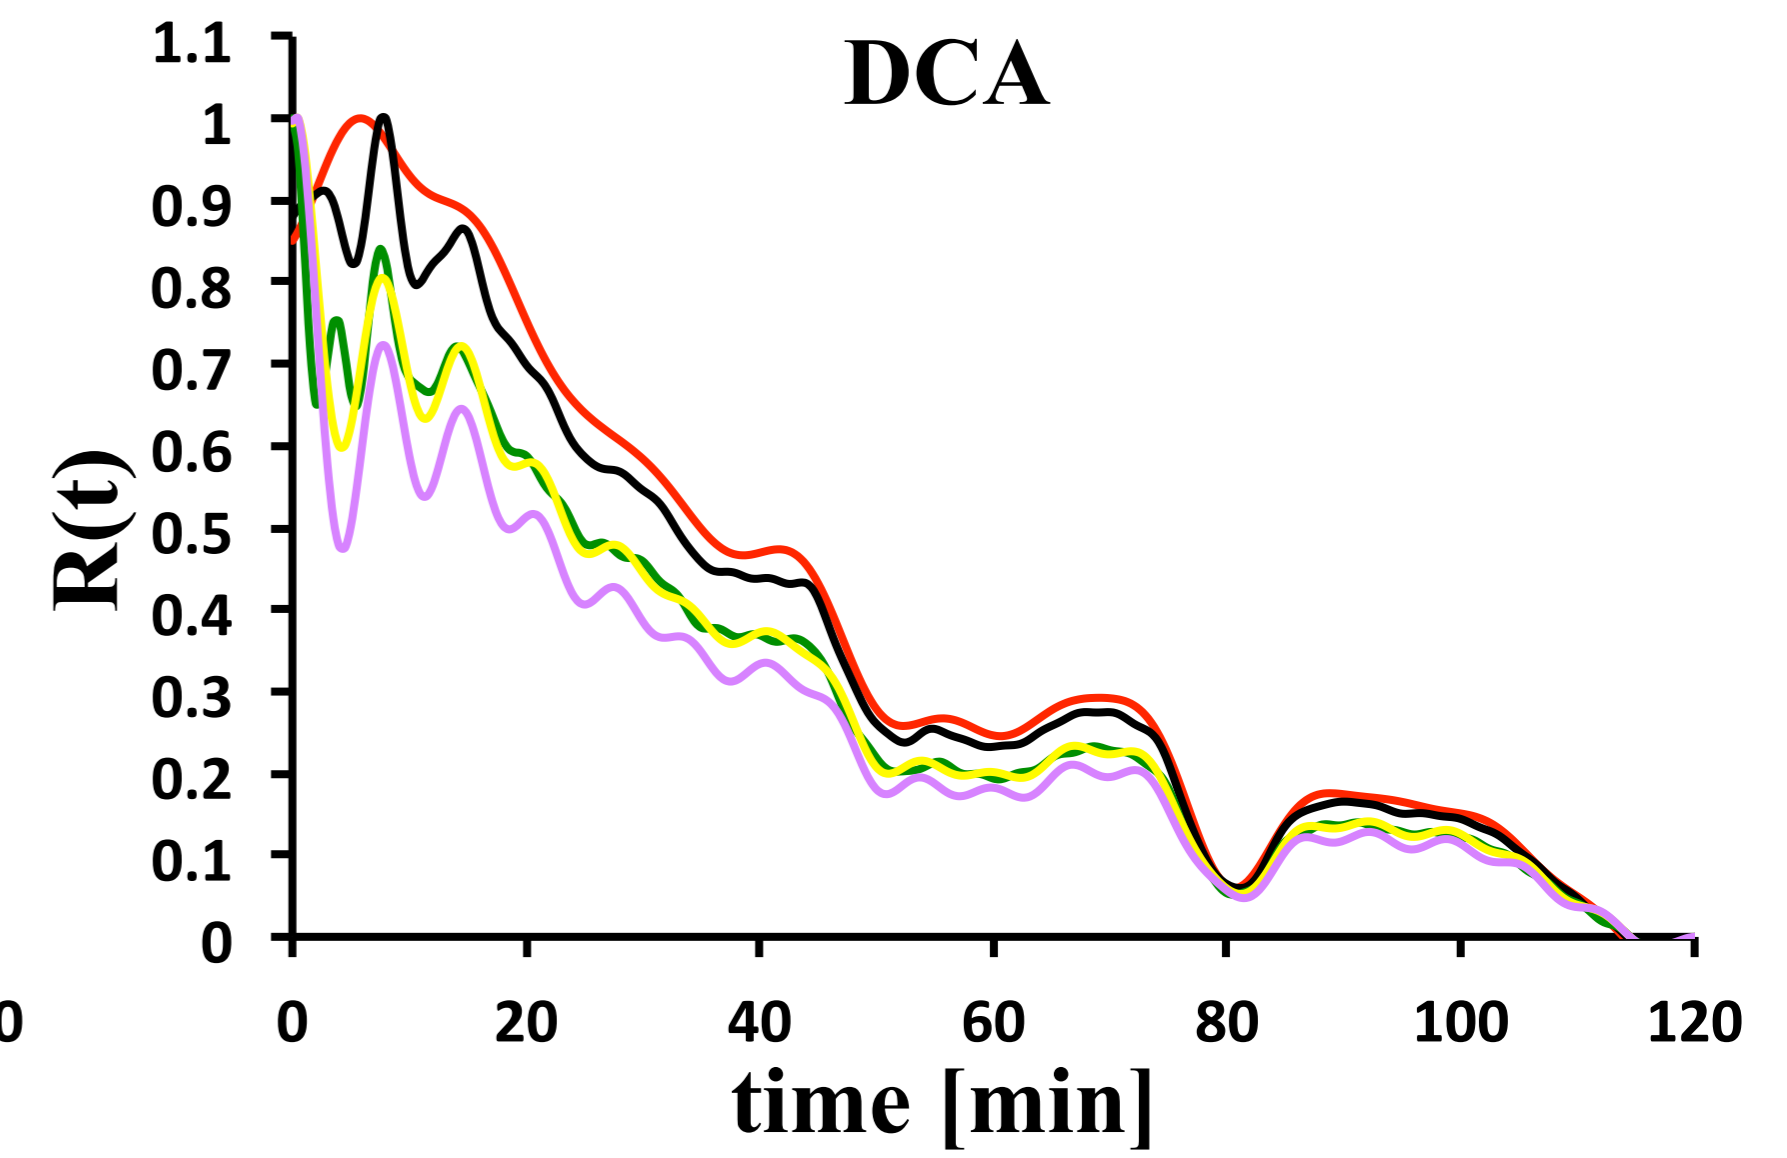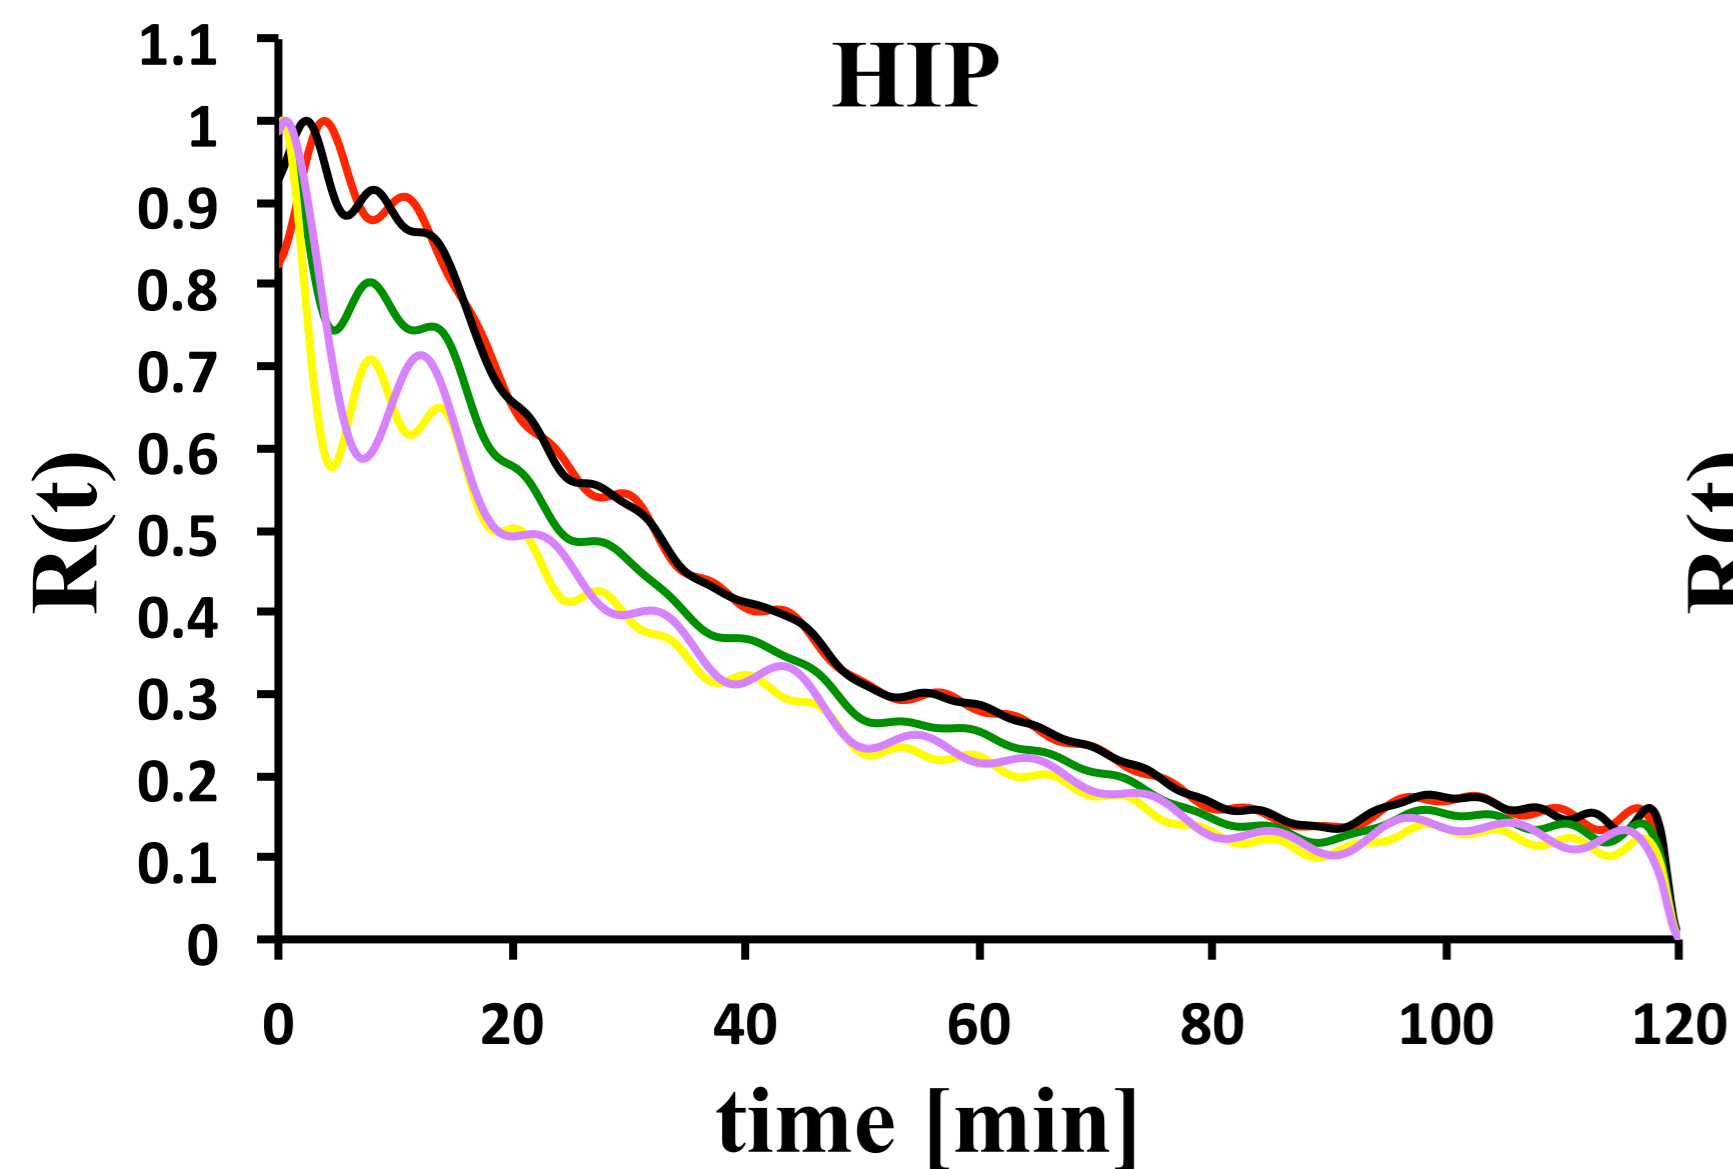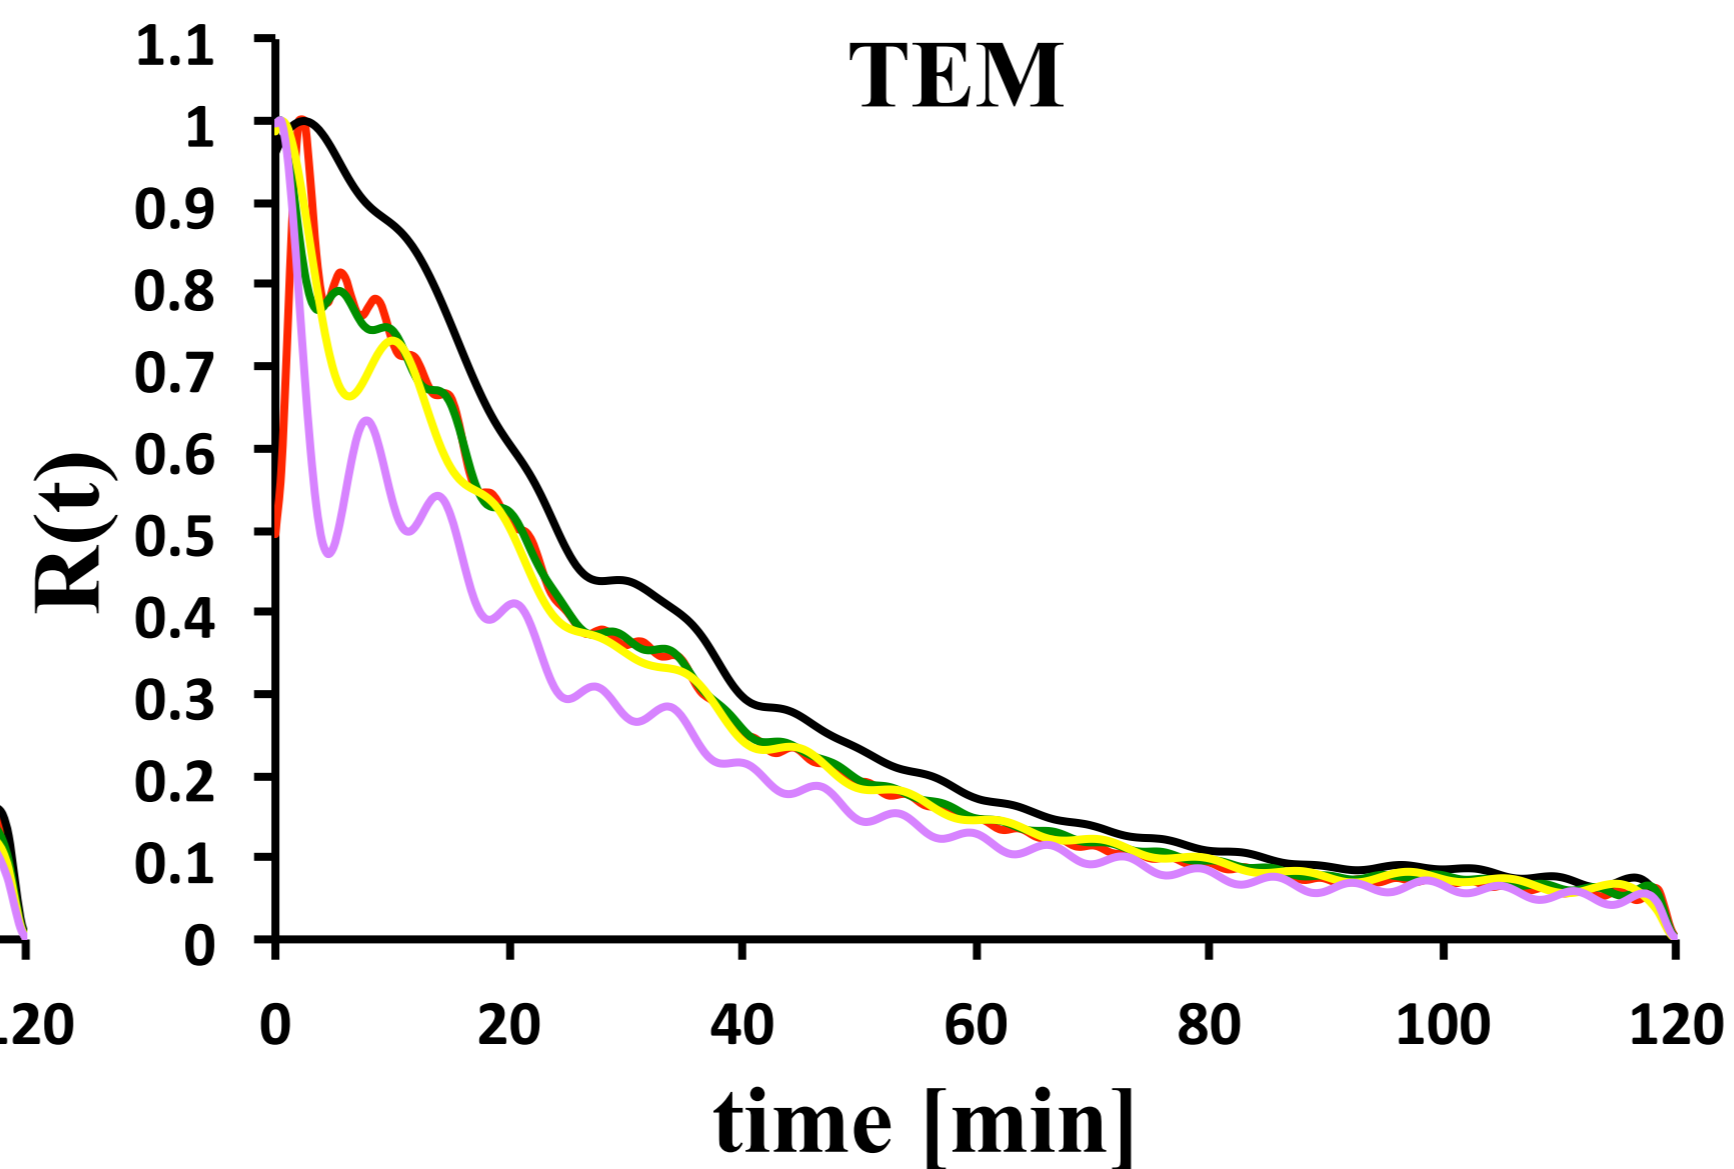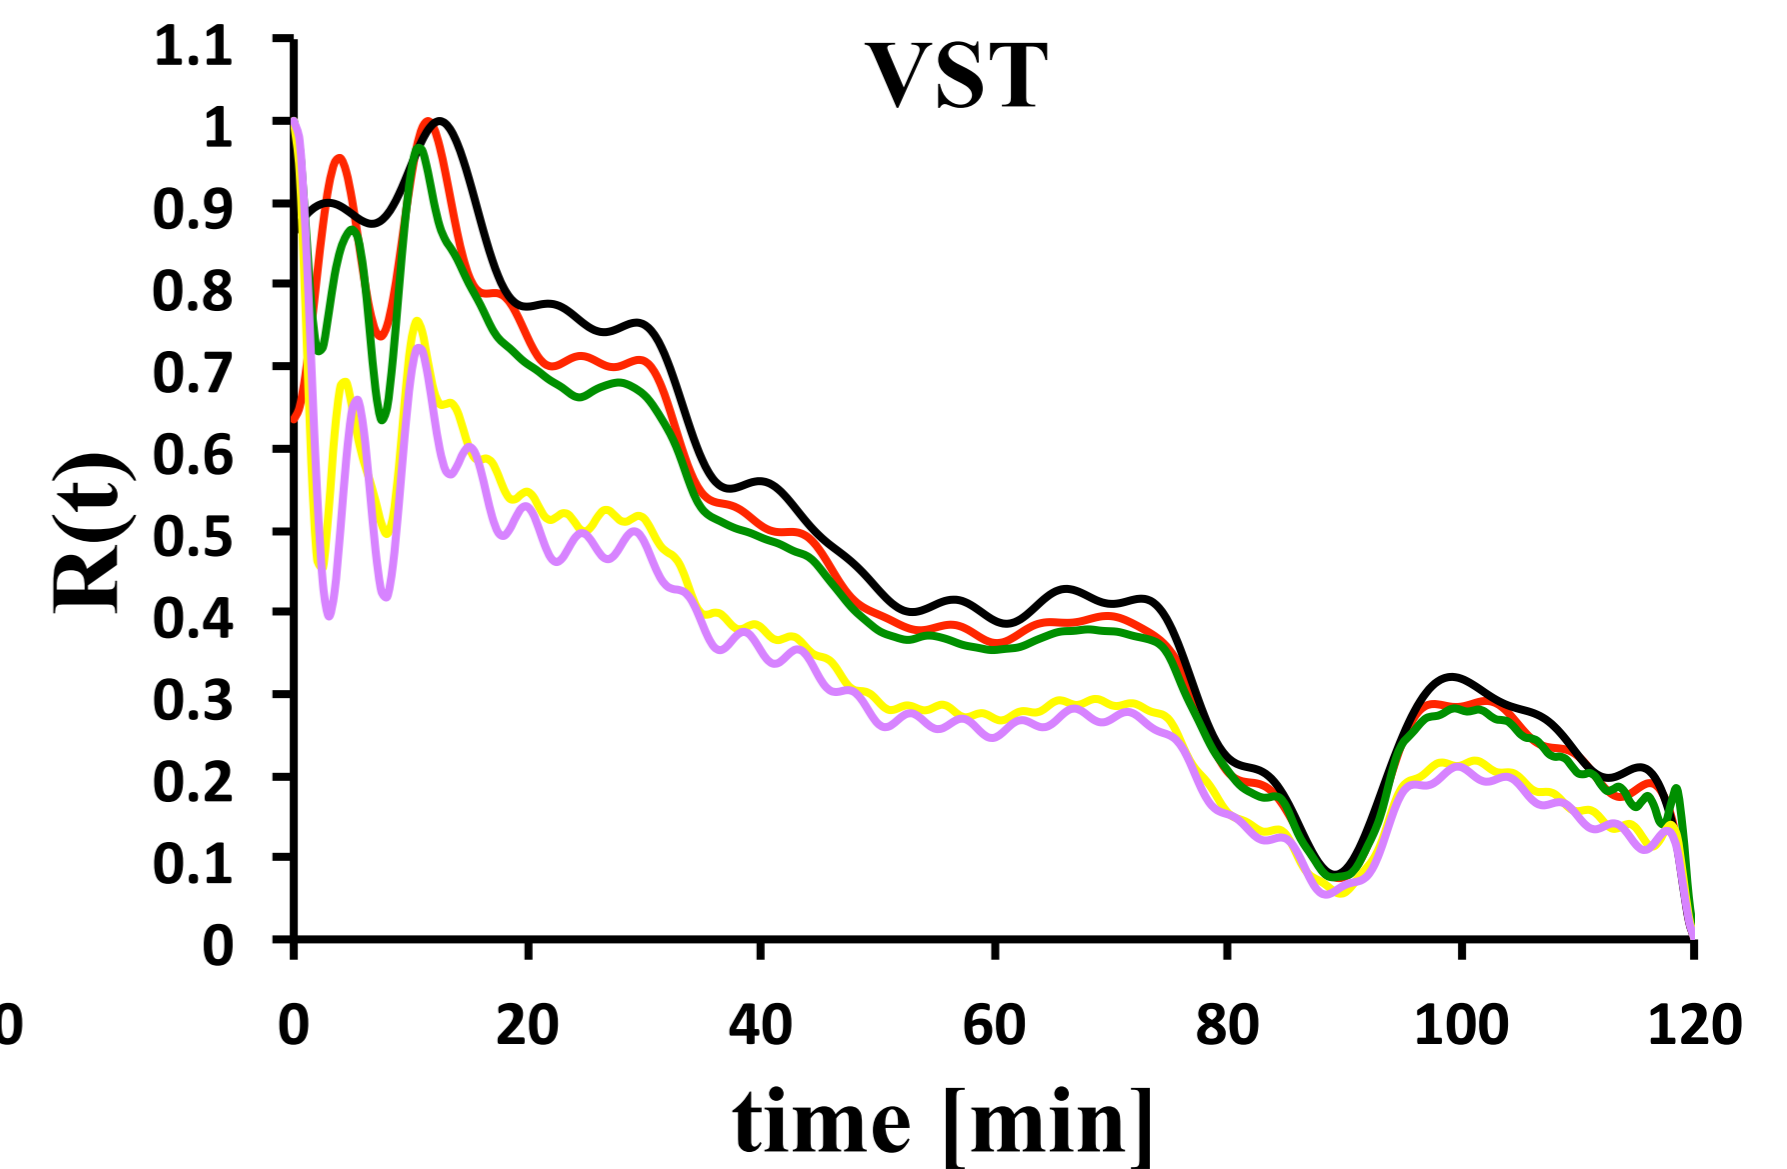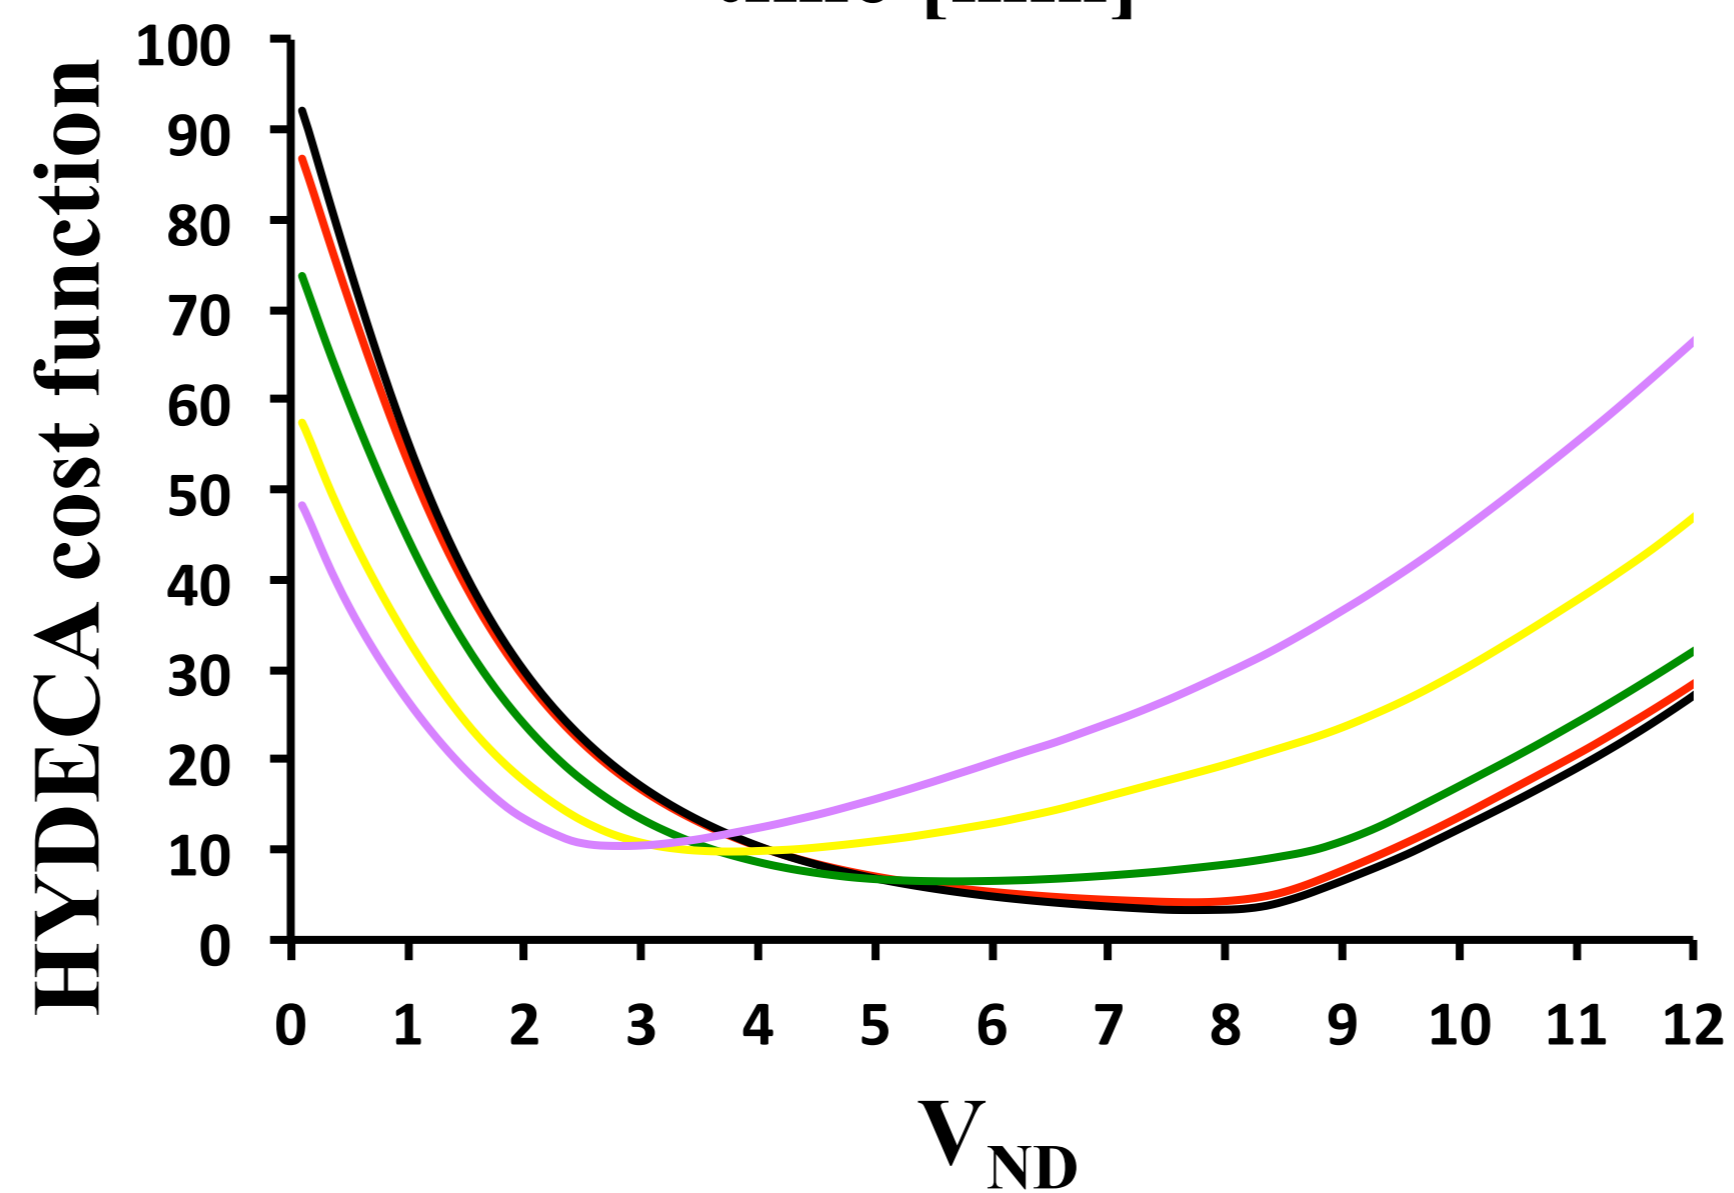

—  $V_B$  error = -4%    —  $V_B$  error = 0%    —  $V_B$  error = 5%    —  $V_B$  error = 10%    —  $V_B$  error = 15%
