# Supplementary material for: A hybrid deconvolution approach for estimation of in vivo non-displaceable binding for brain PET targets without a reference region
Source: PubMed Central journal article supplement (PMC5411064; doi:10.1371/journal.pone.0176636), 2017-05-01
Supplement: pone.0176636.s008.pdf [file pone.0176636.s008.pdf]

[<sup>11</sup>C]DASB

CGM -  $V_{ND} = 3$

VST -  $V_{ND} = 3$

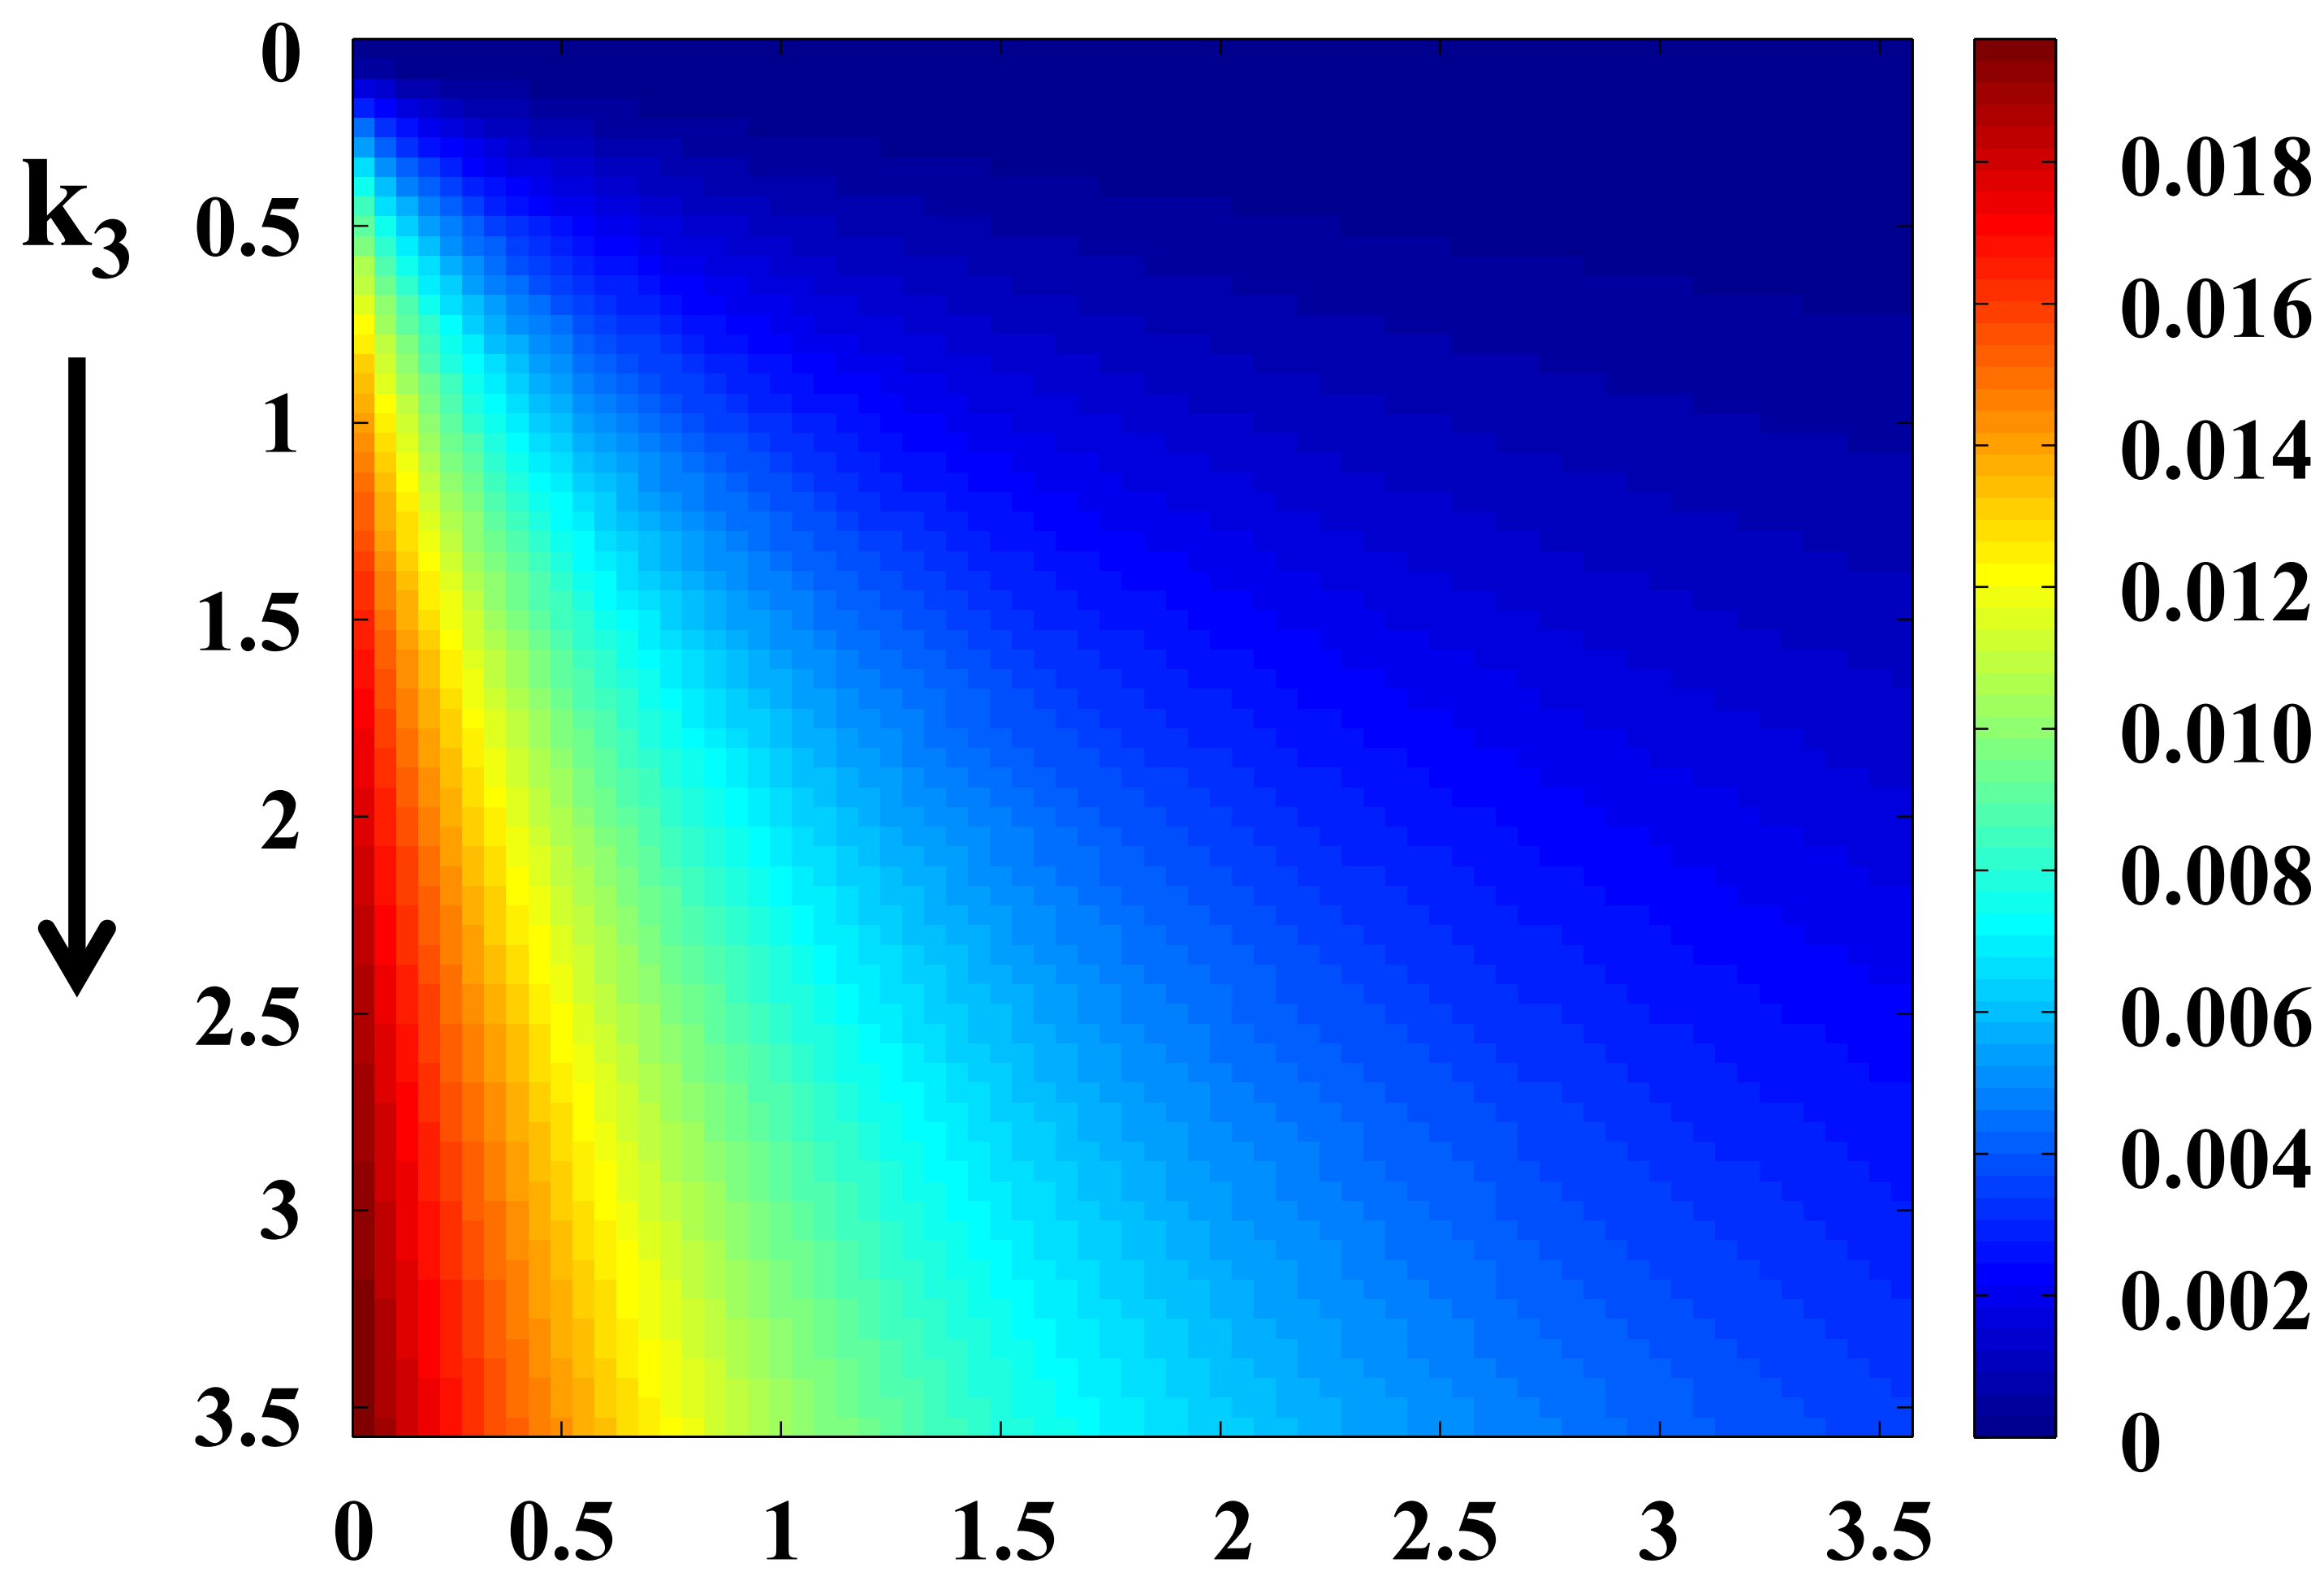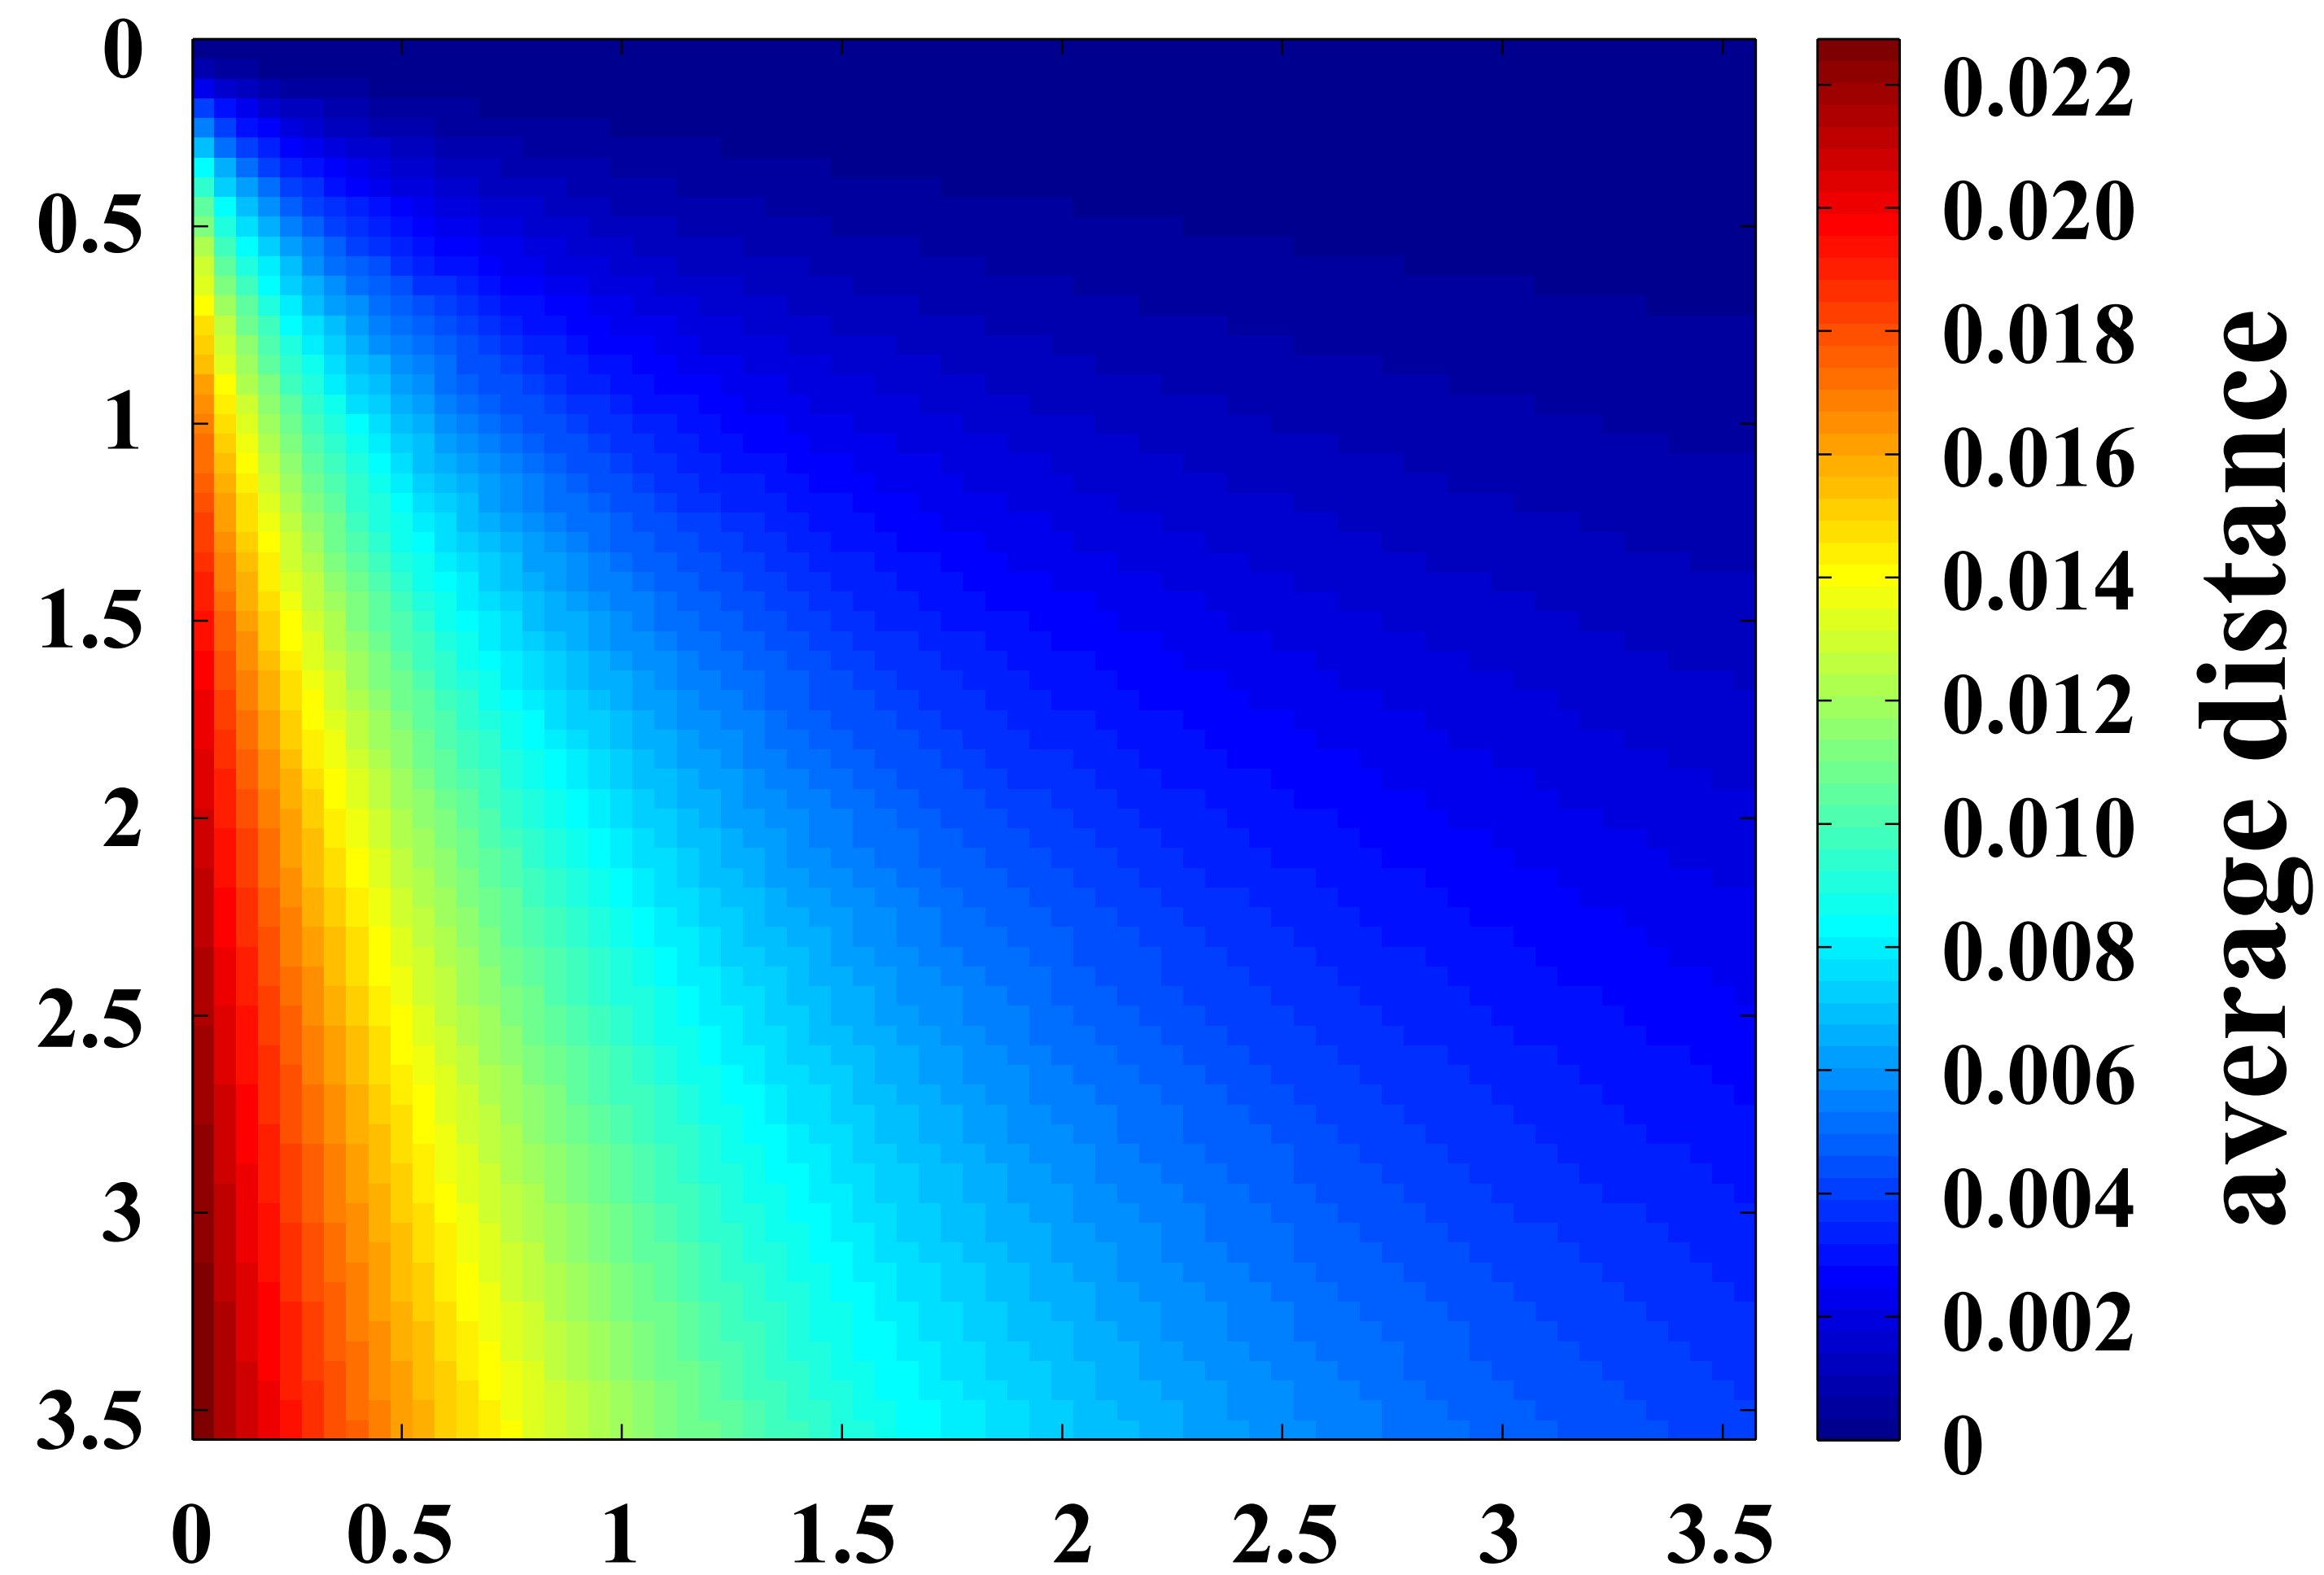

CGM -  $V_{ND} = 5$

VST -  $V_{ND} = 5$

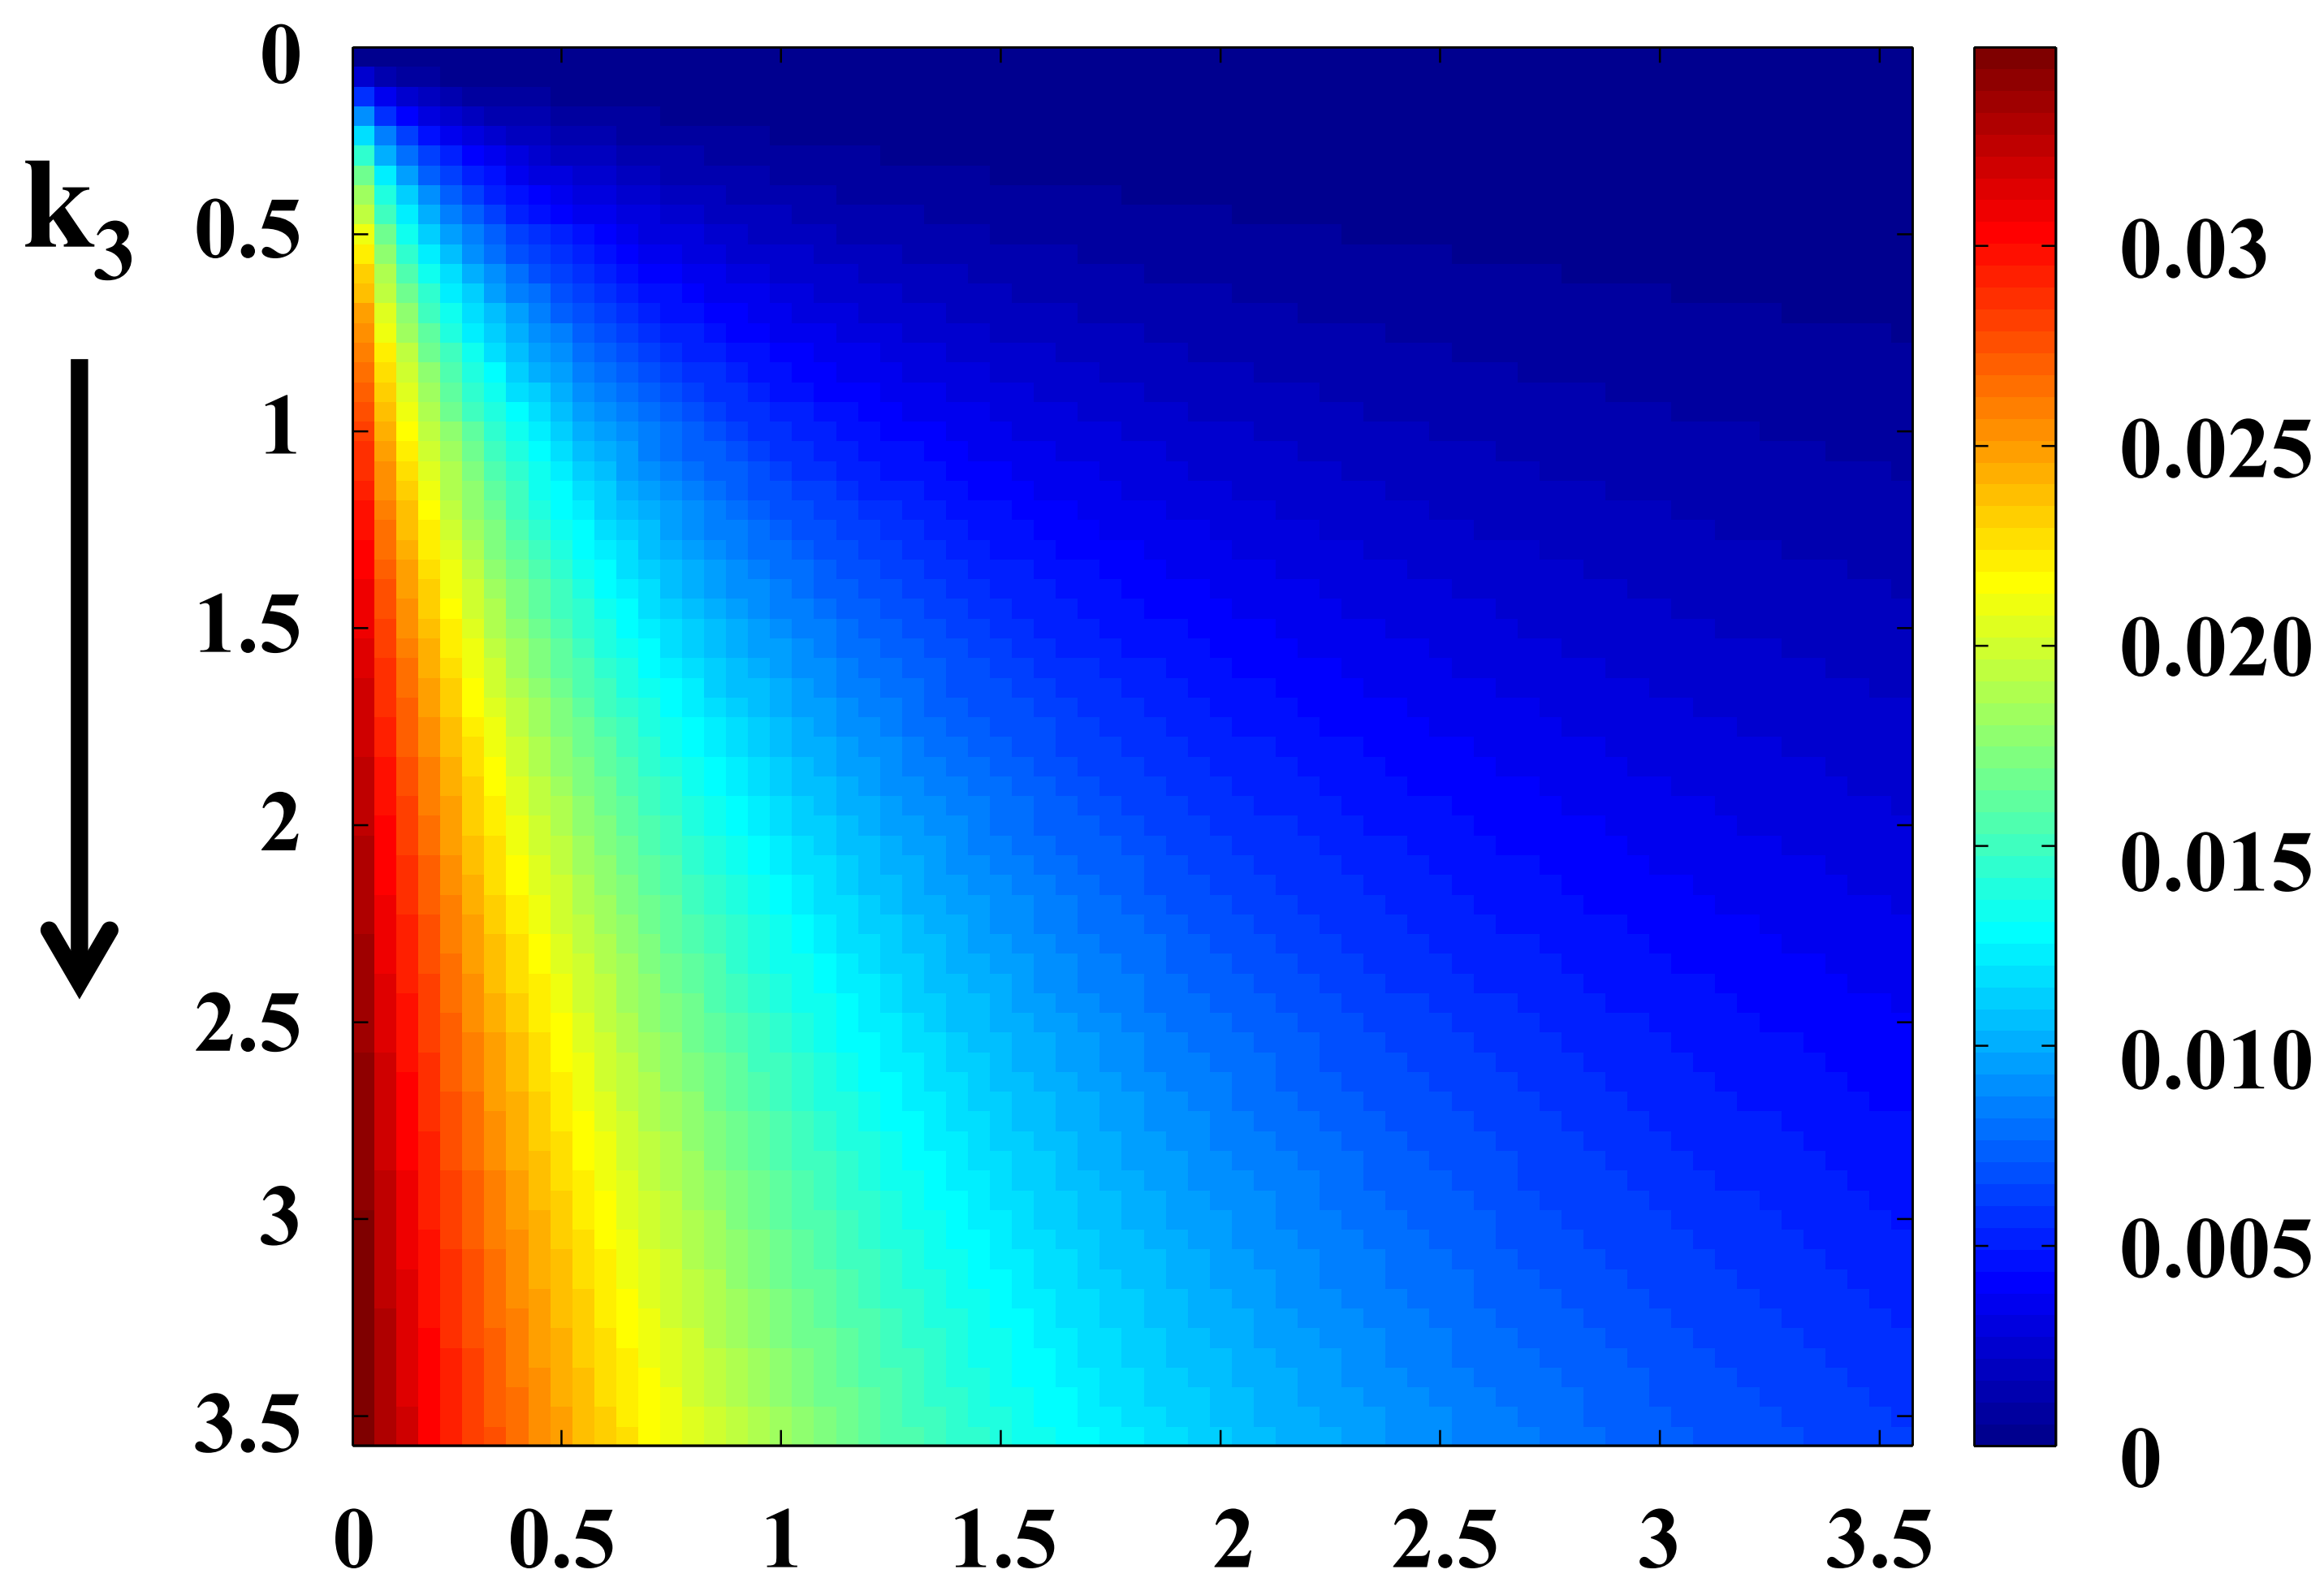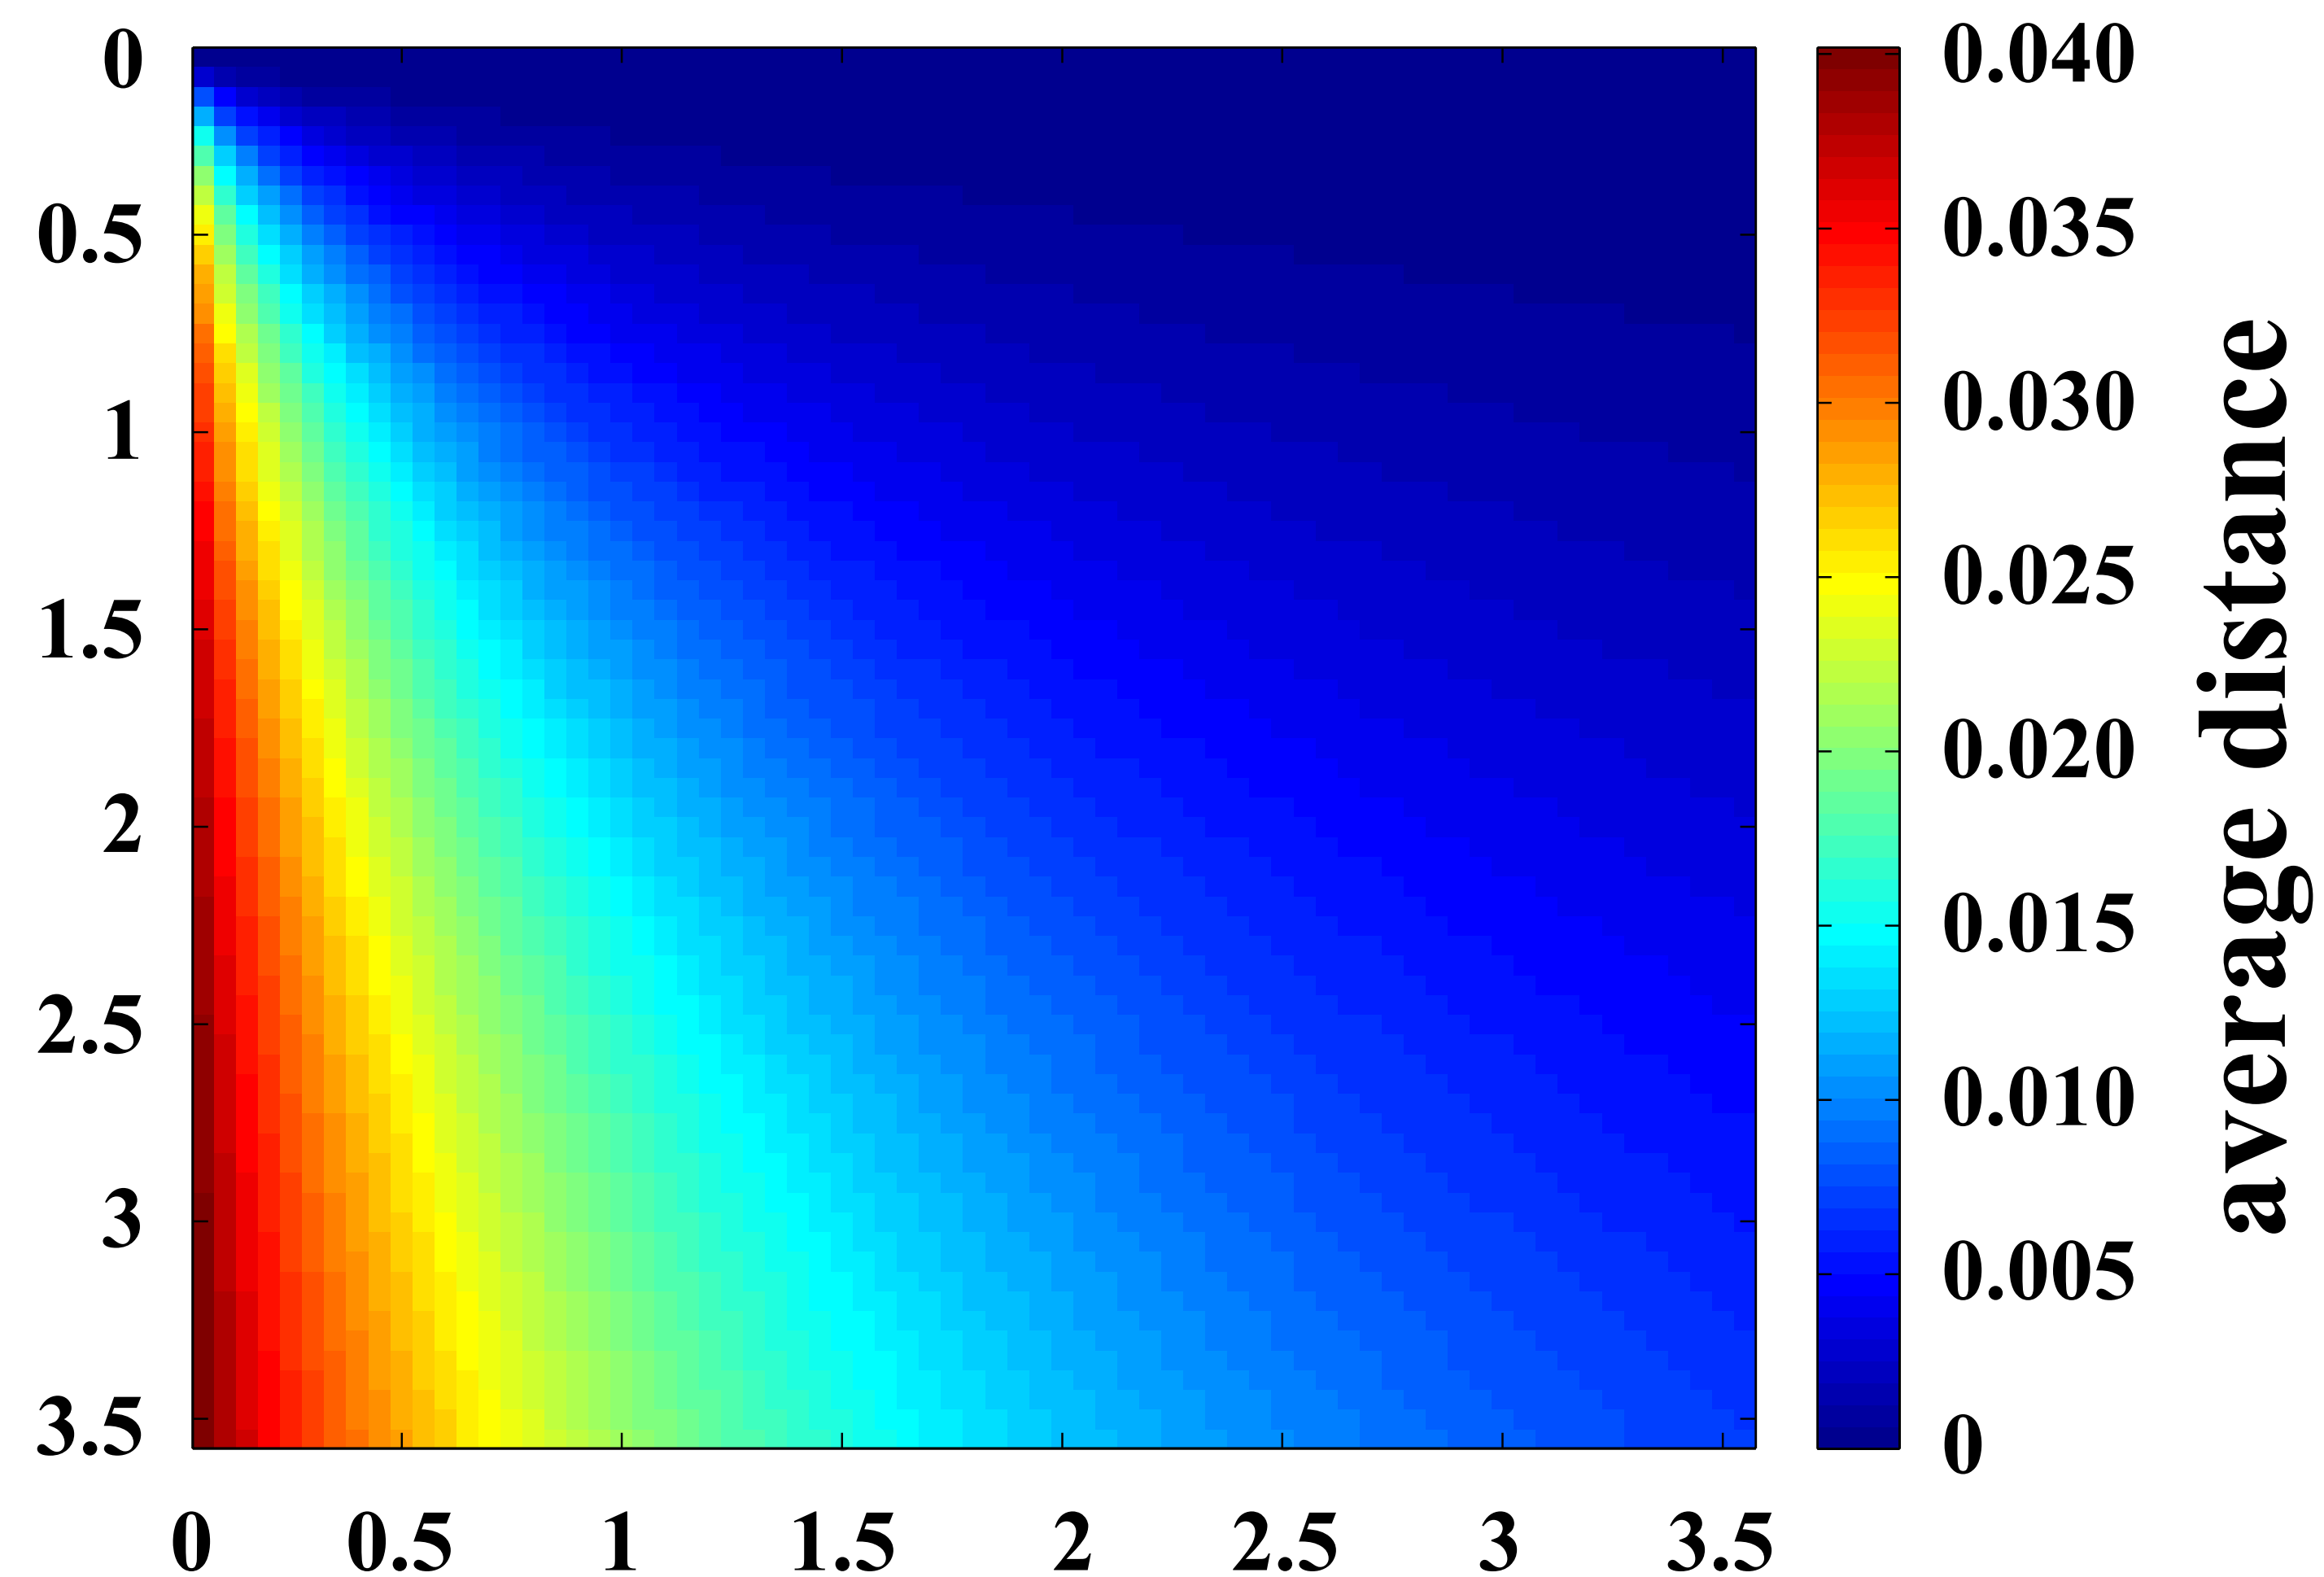

$k_4$  →

$k_4$  →
