# Supplementary material for: A hybrid deconvolution approach for estimation of in vivo non-displaceable binding for brain PET targets without a reference region
Source: PubMed Central journal article supplement (PMC5411064; doi:10.1371/journal.pone.0176636), 2017-05-01
Supplement: pone.0176636.s011.pdf [file pone.0176636.s011.pdf]

## Comparison of binding potentials and test-retest percent difference values

### **BP<sub>P-HYBRID</sub>**

$$BP_{P-HYBRID} = V_T (LEGA) - V_{ND} (HYDECA) \quad (S7 \text{ Equation})$$

where  $V_T (LEGA)$  is the tracer total distribution volume ( $V_T$ ) obtained in each region using Likelihood Estimation in Graphical Analysis (LEGA) [1], and  $V_{ND} (HYDECA)$  is the tracer non-displaceable binding ( $V_{ND}$ ) estimated by HYDECA. The estimate of  $V_{ND}$  obtained by HYDECA in a subject is always lower than the corresponding tracer  $V_T$  in the non-ideal reference region ( $V_{T-RR,LEGA}$ ). Therefore, as shown in **S3** and **S4 Figs**,  $BP_{P-HYBRID}$  values based on HYDECA  $V_{ND}$  are by definition always higher than  $BP_{P-RR,LEGA} = V_T (LEGA) - V_{T-RR,LEGA}$  values based on  $V_{T-RR,LEGA}$ .

As shown in the scatter plot on the top right of **S3 Fig** (which reports the distance between test-retest percent difference values obtained using  $BP_{P-HYBRID}$  and values obtained using  $BP_{P-RR,LEGA}$ , versus the corresponding distance between  $BP_{P-HYBRID}$  and  $BP_{P-RR,LEGA}$ ), for [<sup>11</sup>C]DASB only in 57% (HYDECA with  $\beta_{opt-S}$  and  $\gamma_{opt-S}$ ) and 58% (HYDECA with  $\beta_{opt-B}$  and  $\gamma_{opt-B}$ ) of the cases the corresponding percent difference values based on HYDECA are lower (better reproducibility) than values based on  $V_{T-RR,LEGA}$ . As reported in **Figure 6** in the manuscript, in the dorsal caudate (DCA) only  $PD_{BPP}$  values based on HYDECA with  $\beta_{opt-B}$ ,  $\gamma_{opt-B}$  are on average lower than  $PD_{BPP}$  values based on  $V_{T-RR,LEGA}$ , even though  $BP_{P-HYBRID}$  values are always higher.

For [<sup>11</sup>C]CUMI-101 (**S4 Fig**), only in 79% (HYDECA with  $\beta_{opt-S}$ ,  $\gamma_{opt-S}$ ) and 63% (HYDECA with  $\beta_{opt-B}$ ,  $\gamma_{opt-B}$ ) of the cases the corresponding  $PD_{BPP}$  values based on HYDECA are lower (better reproducibility) than the  $PD_{BPP}$  values based on  $V_{T-RR,LEGA}$ .

### **BP<sub>P-END</sub>**

Differently from  $BP_{P-HYBRID}$ ,  $BP_{P-END}$  (please see definition in **S1 Text** or original publications [2, 3]) estimates based on HYDECA are not systematically higher than corresponding  $BP_{P-RR,LEGA}$  values based on  $V_{T-RR,LEGA}$ , as shown in the middle panels of **S3** and **S4 Figs**. For [<sup>11</sup>C]DASB (**S3 Fig**), only in the 64% (HYDECA with  $\beta_{opt-S}$ ,  $\gamma_{opt-S}$ ) and 66% (HYDECA with  $\beta_{opt-B}$ ,  $\gamma_{opt-B}$ ) of the cases  $BP_{P-END}$  values are higher than  $BP_{P-RR,LEGA}$  values, and only in the 47% (HYDECA with  $\beta_{opt-S}$ ,  $\gamma_{opt-S}$ ) and 52% (HYDECA with  $\beta_{opt-B}$ ,  $\gamma_{opt-B}$ ) of these cases the corresponding  $PD_{BPP}$  values based on HYDECA are lower (better reproducibility) than values based on  $V_{T-RR,LEGA}$ .

For [<sup>11</sup>C]CUMI-101 (**S4 Fig**), only in the 79% (HYDECA with  $\beta_{opt-S}$ ,  $\gamma_{opt-S}$ ) and 67% (HYDECA with  $\beta_{opt-B}$ ,  $\gamma_{opt-B}$ ) of the cases  $BP_{P-END}$  values are higher than values based on  $V_{T-RR,LEGA}$ , and only in the 79% (HYDECA with  $\beta_{opt-S}$ ,  $\gamma_{opt-S}$ ) and 81% (HYDECA with  $\beta_{opt-B}$ ,  $\gamma_{opt-B}$ ) of these cases the corresponding  $PD_{BPP}$  values based on HYDECA are lower than values based on  $V_{T-RR,LEGA}$ .

### **BP<sub>P-NP2</sub>**

As with  $BP_{P-END}$ ,  $BP_{P-NP2}$  estimates (please see definition in **S1 Text** or original publications [2, 3]) based on HYDECA are not always higher than corresponding  $BP_{P-RR,LEGA}$  values based on  $V_{T-RR,LEGA}$ , as shown in the bottom panels of **S3** and **S4 Figs**.

For [<sup>11</sup>C]DASB (**S3 Fig**), in the 94% (HYDECA with  $\beta_{opt-S}$ ,  $\gamma_{opt-S}$ ) and 98% (HYDECA with  $\beta_{opt-B}$ ,  $\gamma_{opt-B}$ ) of the cases  $BP_{P-NP2}$  values are higher than  $BP_{P-RR,LEGA}$  values; however, only in 43% (HYDECA with  $\beta_{opt-S}$ ,  $\gamma_{opt-S}$ ) and 52% (HYDECA with  $\beta_{opt-B}$ ,  $\gamma_{opt-B}$ ) of these cases, the corresponding  $PD_{BPP}$  values based on HYDECA are lower (better reproducibility) than values based on  $V_{T-RR,LEGA}$ .

For [<sup>11</sup>C]CUMI-101 (**S4 Fig**), in all cases  $BP_{P-NP2}$  values are higher than  $BP_{P-RR,LEGA}$  values; however, only in 58% (HYDECA with  $\beta_{opt-S}$ ,  $\gamma_{opt-S}$ ) and 50% (HYDECA with  $\beta_{opt-B}$ ,  $\gamma_{opt-B}$ )

of these cases, the corresponding  $PD_{BPP}$  values based on HYDECA are lower than values based on  $V_{T-RR,LEGA}$ .

All together these observations suggest that the fact that  $BP_p$  estimates can be lower when based on  $V_{T-RR,LEGA}$  does not necessarily lead to higher  $PD_{BPP}$  values, and that the worse test-retest reproducibility of the estimates based on  $V_{T-RR,LEGA}$  is not due only to the magnitude of estimated  $V_{ND}$ .

1. Ogden RT. Estimation of kinetic parameters in graphical analysis of PET imaging data. *Statistics in medicine*. 2003;22(22):3557-68. Epub 2003/11/06. doi: 10.1002/sim.1562. PubMed PMID: 14601019.
2. Zanderigo F, Parsey RV, Todd Ogden R. Model-free quantification of dynamic PET data using nonparametric deconvolution. *Journal of cerebral blood flow and metabolism : official journal of the International Society of Cerebral Blood Flow and Metabolism*. 2015;35(8):1368-79. doi: 10.1038/jcbfm.2015.65. PubMed PMID: 25873427; PubMed Central PMCID: PMC4528013.
3. Jiang CR, Aston JA, Wang JL. A Functional Approach to Deconvolve Dynamic Neuroimaging Data. *J Am Stat Assoc*. 2016;111(513):1-13. doi: 10.1080/01621459.2015.1060241. PubMed PMID: 27226673; PubMed Central PMCID: PMC4867865.
