# Supplementary material for: A hybrid deconvolution approach for estimation of in vivo non-displaceable binding for brain PET targets without a reference region
Source: PubMed Central journal article supplement (PMC5411064; doi:10.1371/journal.pone.0176636), 2017-05-01
Supplement: pone.0176636.s013.pdf [file pone.0176636.s013.pdf]

### Assumption of a mono-exponential non-displaceable residue function

To ensure identifiability of the two components of the residue function curve  $R(t)$  (non-displaceable,  $R_{ND}(t)$ , and specific,  $R_S(t)$ ), HYDECA needs to assume a certain shape to describe the non-displaceable component. We chose, in part for its simplicity, a mono-exponential function, which we regard as a reasonable choice, since it would represent the impulse response function in the case of an “ideal” reference region with total distribution volume equal to the non-displaceable distribution volume ( $V_{ND}$ ). Assuming a mono-exponential function for  $R_{ND}(t)$  represents an approximation (if a two-tissue compartment model, 2TCM, is needed to describe the data in a given region,  $R_{ND}(t)$  would be described by two exponentials). We note that a similar approximation is central in the development of the very widely used simplified reference tissue model (SRTM) [1]. Specifically, SRTM assumes that the total (non-displaceable plus specific) impulse response function of the target region (which, as well, would be a two-exponential function) can be reasonably approximated by a mono-exponential curve.

Here we report, for the interested reader, the derivation of the expression of  $R_{ND}(t)$  in the case of a 2TCM. The concentration of tracer in the two tissue compartments can be described by the following system of equations

$$\begin{cases} \frac{dC_{ND}(t)}{dt} = K_1 C_P(t) - (k_2 + k_3)C_{ND}(t) + k_4 C_S(t) \\ \frac{dC_S(t)}{dt} = k_3 C_{ND}(t) - k_4 C_S(t) \end{cases} \quad (\text{S8 Equation})$$

where  $C_{ND}(t)$ ,  $C_P(t)$ , and  $C_S(t)$  are the tracer concentration in the non-displaceable, plasma, and specific compartment, respectively; using Laplace transformation we obtain

$$\begin{cases} sC_{ND}(s) = K_1 C_P(s) - (k_2 + k_3)C_{ND}(s) + k_4 C_S(s) \\ sC_S(s) = k_3 C_{ND}(s) - k_4 C_S(s) \end{cases} \quad (\text{S9 Equation})$$

where  $C_{ND}(s)$ ,  $C_P(s)$ , and  $C_S(s)$  are the Laplace transforms of  $C_{ND}(t)$ ,  $C_P(t)$ , and  $C_S(t)$ , respectively; with simple substitutions the system of equations can be expressed as

$$\begin{cases} C_{ND}(s) = \frac{K_1(s+k_4)C_P(s)}{s^2+s(k_2+k_3+k_4)+k_2k_4} \\ C_S(s) = \frac{k_3 C_{ND}(s)}{s+k_4} \end{cases} \quad (\text{S10 Equation})$$

from which it follows that

$$IRF_{ND}(s) = \frac{C_{ND}(s)}{K_1 C_P(s)} = \frac{s+k_4}{s^2+s(k_2+k_3+k_4)+k_2k_4} \quad (\text{S11 Equation})$$

where  $IRF_{ND}(s)$  is the Laplace transforms of  $R_{ND}(t)$ ; with simple calculations  $IRF_{ND}(s)$  can be expressed as

$$IRF_{ND}(s) = \frac{C_{ND}(s)}{K_1 C_P(s)} = \frac{s+k_4}{s^2+s(k_2+k_3+k_4)+k_2k_4} = \frac{A}{s+\alpha_1} + \frac{B}{s+\alpha_2} \quad (\text{S12 Equation})$$

with

$$\begin{cases} \alpha_1 = \frac{k_2+k_3+k_4-\sqrt{(k_2+k_3+k_4)^2-4k_2k_4}}{2} \\ \alpha_2 = \frac{k_2+k_3+k_4+\sqrt{(k_2+k_3+k_4)^2-4k_2k_4}}{2} \end{cases} \quad (\text{S13 Equation})$$

and

$$\begin{cases} A = \frac{k_4-\alpha_1}{\alpha_2-\alpha_1} \\ B = \frac{\alpha_2-k_4}{\alpha_2-\alpha_1} \end{cases} \quad (\text{S14 Equation})$$

which leads to the following expression of  $R_{ND}(t)$  in time domain

$$IRF_{ND}(t) = R_{ND}(t) = Ae^{-\alpha_1 t} + Be^{-\alpha_2 t} \quad (\text{S15 Equation})$$

To evaluate the validity of such approximation for the two tracers at hand, we considered the  $K_1$  and  $k_2$  values we used for the simulation in 8 different cases (in each tracer, 2 regions, the one with the lowest and the highest tracer total distribution volume,  $V_T$ , respectively, with 2 different settings of  $V_{ND}$ ,  $V_{ND} = 3$  and  $V_{ND} = 5$ ), and evaluated how much a two-exponential  $R_{ND}(t)$  curve from **S15 Equation** deviated from the assumption of a mono-exponential  $R_{ND}(t)$  curve (which is exactly correct when  $k_3 = k_4 = 0$ ) as  $k_3$  and  $k_4$  vary in a range (0 to 3.5) that covers the kinetics of the two considered tracers. We evaluated the difference between the two curves at each combination of  $k_3$  and  $k_4$  values by calculating the average (across time points) square distance between the two curves. As **S8** and **S9 Figs** show in the case of [ $^{11}\text{C}$ ]DASB and [ $^{11}\text{C}$ ]CUMI-101, respectively, given a certain value of  $k_4$ , the approximation of a mono-exponential is less and less appropriate as the value of  $k_3$  increases, while given a certain value of  $k_3$ , the approximation is more and more appropriate as the value of  $k_4$  increases. Thus indicates that a mono-exponential approximation for  $R_{ND}(t)$  would be problematic only in the situation in which  $k_3 \gg k_4$ , which means that more tracer molecules transit in a given amount of time from the non-displaceable binding state into the specific binding state than vice versa.

We remind the reader: 1) that HYDECA uses data across many regions, for some of which the mono-exponential assumption may hold better than for others, and provides a brain-wide value of  $V_{ND}$  that satisfies certain constraints (via the HYDECA cost function) on average across such regions; and 2) that parts of the  $R_{ND}(t)$  curve that are potentially erroneously determined in a region due to the simplifying mono-exponential assumption for  $R_{ND}(t)$  are likely to be captured by the corresponding nonparametric  $R_S(t)$ , for which there is no assumption besides being positive and monotonic.

1. Lammertsma AA, Hume SP. Simplified reference tissue model for PET receptor studies. *NeuroImage*. 1996;4(3 Pt 1):153-8. Epub 1996/12/01. doi: 10.1006/nimg.1996.0066. PubMed PMID: 9345505.
