# Supplementary material for: A hybrid deconvolution approach for estimation of in vivo non-displaceable binding for brain PET targets without a reference region
Source: PLoS One. 2017 May 1;12(5):e0176636. doi: 10.1371/journal.pone.0176636 (PMC5411064; doi:10.1371/journal.pone.0176636)
Supplement: S1 Text — Supporting information and equations accompanying S1 and S2 Figs. (PDF) [file pone.0176636.s010.pdf]

### Alternative nonparametric binding potentials and their test-retest reproducibility

As the non-displaceable distribution volume ( $V_{ND}$ ) is ultimately estimated in order to calculate the tracer binding potentials to the target of interest, we considered two available test-retest datasets with [ $^{11}\text{C}$ ]DASB [1] (10 subjects, 20 scans) and [ $^{11}\text{C}$ ]CUMI-101 [2] (6 subjects, 12 scans) and checked the reproducibility characteristics of binding potentials derived using HYDECA versus using the purported reference region. While the results related to the binding potentials  $BP_{P-HYBRID}$  and  $BP_{ND-HYBRID}$  [3] are reported in the main manuscript, here we report results related to alternative binding potentials that can be derived when performing nonparametric quantification of the Positron Emission Tomography (PET) data [4, 5].

Specifically, in all scans and regions, we also calculated:

$$BP_{P-END} = V_{T-END} - V_{ND} \text{ (HYDECA)} \quad (\text{S1 Equation})$$

where  $V_{ND}$  (HYDECA) is the  $V_{ND}$  estimated using HYDECA, and  $V_{T-END}$  is the tracer total distribution volume ( $V_T$ ) obtained in each region using numerical deconvolution (singular value decomposition) and calculated as [4, 5]:

$$V_{T-END} = K_i \int_0^{T_{END}} R_i(\tau) d\tau \quad (\text{S2 Equation})$$

with  $T_{END}$  the scan end time; and

$$BP_{P-NP2} = V_{T-NP2} - V_{ND} \text{ (HYDECA)} \quad (\text{S3 Equation})$$

where  $V_{T-NP2}$  is the  $V_T$  obtained in each region using singular value decomposition and calculated as [4]:

$$V_{T-NP2} = \frac{K_i}{N} \sum_{n=N_1}^{n=N_Q} \frac{R_i^{-1}(n)}{\log(1/n)} \quad (\text{S4 Equation})$$

where  $R_i^{-1}(n)$  indicates the  $n^{\text{th}}$  quantile of the residence density, which is the time at which  $R_i(t)$  reaches a  $n^{\text{th}}$  of its initial value, with  $n = N_1, \dots, N_Q$ ;  $Q$  is the number of considered quantiles; and the factor  $\log(1/n)$  ensures that, if the residence density is exponential as in the case of a one-tissue compartment model,  $R_i^{-1}(n)/\log(1/n)$  is equal to the mean of the residence distribution.

For each of the test-retest pair and region, we calculated the percent difference  $PD_{BPP}$  as  $PD_{BPP} = 100 \frac{|BP_{P-T} - BP_{P-RT}|}{(BP_{P-T} + BP_{P-RT})/2}$ , where  $BP_{P-T}$  indicates the test estimate, and  $BP_{P-RT}$  the re-test estimate. We computed average and standard deviation (SD) (across subjects within the same tracer) of the  $PD_{BPP}$  values in each region, and compared them to those obtained for:  $BP_{P-RR,LEGA} = V_T \text{ (LEGA)} - V_{T-RR,LEGA}$ , which is based on the distribution volume in the purported reference region ( $V_{T-RR,LEGA}$ ), estimated using Likelihood Estimation in Graphical Analysis (LEGA) [6];  $BP_{P-RR,2TCM} = V_T \text{ (2TCM)} - V_{T-RR,2TCM}$ , with  $V_T \text{ (2TCM)}$  and  $V_{T-RR,2TCM}$  the  $V_T$  obtained in each target region and reference region, respectively, using the two-tissue compartment model (2TCM);  $BP_{P-\alpha} = V_T \text{ (LEGA)} - \alpha V_{T-RR,LEGA}$  and  $BP_{P-d} = V_T \text{ (LEGA)} - (V_{T-RR,LEGA} - d)$ , with  $\alpha$  and  $d$  derived from the blocking data as described in the manuscript.

Similarly, we also calculated alternative nonparametric binding potentials:

$$BP_{ND-END} = BP_{P-END}/V_{ND} \text{ (HYDECA)} \quad (\text{S5 Equation})$$

and

$$BP_{ND-NP2} = BP_{P-NP2}/V_{ND} \text{ (HYDECA)} \quad (\text{S6 Equation})$$

and compared their test-retest percent difference ( $PD_{BPND}$ ; average and SD values computed in each region as with  $BP_P$  above) to that of:  $BP_{ND-RR,LEGA} = BP_{P-RR,LEGA}/V_{T-RR,LEGA}$ ;  $BP_{ND-RR,2TCM} = BP_{P-RR,2TCM}/V_{T-RR,2TCM}$ ;  $BP_{ND-\alpha} = BP_{P-\alpha}/\alpha V_{T-RR,LEGA}$ ; and  $BP_{ND-d} = BP_{P-d}/(V_{T-RR,LEGA} - d)$ .

**S1 and S2 Figs** summarize the reproducibility of alternative nonparametric binding potentials that can be derived using HYDECA, with  $\beta$  and  $\gamma$  optimized using either strategies, and the reproducibility obtained for all the other binding potentials.  $PD_{BPP}$  values obtained using HYDECA with either sets of optimized tuning parameters are close to each other (**S1 Fig**). Overall, average  $PD_{BPP}$  values obtained for binding potentials based on HYDECA are better or comparable to values obtained using  $V_{T-RR,LEGA}$ . Average percent difference values for  $BP_{P-RR,2TCM}$  are consistently the worst in the case of [ $^{11}\text{C}$ ]DASB, and overall in the case of [ $^{11}\text{C}$ ]CUMI-101. Average percent difference values based on the scaled  $\alpha V_{T-RR,LEGA}$  or corrected  $V_{T-RR,LEGA} - d$  are better than corresponding values based on  $V_{T-RR,LEGA}$  alone, with both tracers, and are comparable or, in some regions, better than values obtained for estimates based on HYDECA. With [ $^{11}\text{C}$ ]DASB,  $PD_{BPP}$  values obtained for estimates based on HYDECA are the best in amygdala (AMY), temporal lobe (TEM) (HYDECA using  $\beta_{opt-S}$ ,  $\gamma_{opt-S}$ ) and ventral striatum (VST) considering  $BP_{P-END}$ . With [ $^{11}\text{C}$ ]CUMI-101,  $PD_{BPP}$  values obtained for estimates based on HYDECA are the best in hippocampus (HIP), TEM and cingulate (CIN) considering  $BP_{P-END}$ ; and HIP (for HYDECA using  $\beta_{opt-S}$ ,  $\gamma_{opt-S}$ ) considering  $BP_{P-NP2}$ .

For both tracers  $PD_{BPND}$  values for  $BP_{ND}$  estimates obtained using  $V_{T-RR,LEGA}$  are in general, on average, better than  $PD_{BPND}$  values obtained based on HYDECA, with the exception of  $BP_{ND-END}$  in AMY and TEM with [ $^{11}\text{C}$ ]DASB; and  $BP_{ND-END}$  in HIP (for HYDECA using  $\beta_{opt-B}$  and  $\gamma_{opt-B}$ ), and  $BP_{ND-NP2}$  in TEM and occipital lobe (OCC), with [ $^{11}\text{C}$ ]CUMI-101 (**S2 Fig**). Average percent difference values for  $BP_{ND-RR,2TCM}$  are the worst in the case of [ $^{11}\text{C}$ ]DASB, with few exceptions, but overall comparable to  $BP_{ND-RR,LEGA}$  in the case of [ $^{11}\text{C}$ ]CUMI-101. Average percent difference values based on the scaled  $\alpha V_{T-RR,LEGA}$  or corrected  $V_{T-RR,LEGA} - d$  are overall the best with both tracers. The SD values for the  $PD_{BPND}$  are comparable across methods, with exclusion of  $BP_{ND-RR,2TCM}$  in the case of [ $^{11}\text{C}$ ]DASB.

1. Ogden RT, Ojha A, Erlandsson K, Oquendo MA, Mann JJ, Parsey RV. In vivo quantification of serotonin transporters using [(11)C]DASB and positron emission tomography in humans: modeling considerations. *Journal of cerebral blood flow and metabolism : official journal of the International Society of Cerebral Blood Flow and Metabolism*. 2007;27(1):205-17. doi: 10.1038/sj.jcbfm.9600329. PubMed PMID: 16736050; PubMed Central PMCID: PMC3784003.
2. Milak MS, DeLorenzo C, Zanderigo F, Prabhakaran J, Kumar JS, Majo VJ, et al. In vivo quantification of human serotonin 1A receptor using 11C-CUMI-101, an agonist PET radiotracer. *Journal of nuclear medicine : official publication, Society of Nuclear Medicine*. 2010;51(12):1892-900. Epub 2010/11/26. doi: 10.2967/jnumed.110.076257. PubMed PMID: 21098796; PubMed Central PMCID: PMCPmc3856257.
3. Innis RB, Cunningham VJ, Delforge J, Fujita M, Gjedde A, Gunn RN, et al. Consensus nomenclature for in vivo imaging of reversibly binding radioligands. *Journal of cerebral blood flow and metabolism : official journal of the International Society of Cerebral Blood Flow and Metabolism*. 2007;27(9):1533-9. Epub 2007/05/24. doi: 10.1038/sj.jcbfm.9600493. PubMed PMID: 17519979.
4. Zanderigo F, Parsey RV, Todd Ogden R. Model-free quantification of dynamic PET data using nonparametric deconvolution. *Journal of cerebral blood flow and metabolism : official journal of the International Society of Cerebral Blood Flow and Metabolism*. 2015;35(8):1368-

79. doi: 10.1038/jcbfm.2015.65. PubMed PMID: 25873427; PubMed Central PMCID: PMC4528013.
5. Jiang CR, Aston JA, Wang JL. A Functional Approach to Deconvolve Dynamic Neuroimaging Data. *J Am Stat Assoc.* 2016;111(513):1-13. doi: 10.1080/01621459.2015.1060241. PubMed PMID: 27226673; PubMed Central PMCID: PMCPMC4867865.
6. Ogden RT. Estimation of kinetic parameters in graphical analysis of PET imaging data. *Statistics in medicine.* 2003;22(22):3557-68. Epub 2003/11/06. doi: 10.1002/sim.1562. PubMed PMID: 14601019.
